# Supplementary material
Source: Research Square preprint supplement (doi:10.21203/rs.3.rs-8757376/v1)
Supplement: Supplementary file 1 [file 147a9d746af1f4854e4d7db7.xlsx]

## Sheet: 03.pathway_diff
	name	min	max	diff
R-HSA-9636003	NEIL3-mediated resolution of ICLs	-0.9645	0.973306	1.93781
R-HSA-2142696	Synthesis of Hepoxilins (HX) and Trioxilins (TrX)	-0.9126	0.9817	1.8943
R-HSA-1299316	TWIK-releated acid-sensitive K+ channel (TASK)	-0.994106	0.8833	1.87741
R-HSA-8941413	Events associated with phagocytolytic activity of PMN cells	-0.9017	0.8794	1.7811
R-HSA-211994	Sterols are 12-hydroxylated by CYP8B1	-0.7989	0.903942	1.70284
R-HSA-9025106	Biosynthesis of DPAn-6 SPMs	-0.7812	0.7407	1.5219
R-HSA-5263617	Metabolism of ingested MeSeO2H into MeSeH	-0.8063	0.589	1.3953
R-HSA-2395516	Electron transport from NADPH to Ferredoxin	-0.6083	0.5647	1.173
R-HSA-432030	Transport of glycerol from adipocytes to the liver by Aquaporins	-0.366	0.7535	1.1195
R-HSA-428559	Proton-coupled neutral amino acid transporters	-0.4382	0.6675	1.1057
R-HSA-2142712	Synthesis of 12-eicosatetraenoic acid derivatives	-0.36523	0.72	1.08523
R-HSA-8849175	Threonine catabolism	-0.4798	0.5684	1.0482
R-HSA-5626978	TNFR1-mediated ceramide production	-0.542	0.4988	1.0408
R-HSA-165181	Inhibition of TSC complex formation by PKB	-0.6008	0.4275	1.0283
R-HSA-426117	Cation-coupled Chloride cotransporters	-0.5512	0.4752	1.0264
R-HSA-2142770	Synthesis of 15-eicosatetraenoic acid derivatives	-0.557	0.4643	1.0213
R-HSA-141333	Biogenic amines are oxidatively deaminated to aldehydes by MAOA and MAOB	-0.4937	0.4939	0.9876
R-HSA-8866906	TFAP2 (AP-2) family regulates transcription of other transcription factors	-0.429626	0.5518	0.981426
R-HSA-2161541	Abacavir metabolism	-0.461037	0.504	0.965037
R-HSA-5653890	Lactose synthesis	-0.768818	0.1721	0.940918
R-HSA-1296346	Tandem pore domain potassium channels	-0.455761	0.4776	0.933361
R-HSA-9026395	Biosynthesis of DHA-derived sulfido conjugates	-0.6899	0.2299	0.9198
R-HSA-9026762	Biosynthesis of maresin conjugates in tissue regeneration (MCTR)	-0.6899	0.2299	0.9198
R-HSA-433692	Proton-coupled monocarboxylate transport	-0.482041	0.427	0.909041
R-HSA-156582	Acetylation	-0.4717	0.4241	0.8958
R-HSA-419812	Calcitonin-like ligand receptors	-0.416	0.4798	0.8958
R-HSA-163210	Formation of ATP by chemiosmotic coupling	-0.430393	0.4361	0.866493
R-HSA-9864848	Complex IV assembly	-0.488495	0.3747	0.863195
R-HSA-389397	Orexin and neuropeptides FF and QRFP bind to their respective receptors	-0.0497241	0.8039	0.853624
R-HSA-114294	Activation, translocation and oligomerization of BAX	-0.418334	0.4317	0.850034
R-HSA-187706	Signalling to p38 via RIT and RIN	-0.566	0.2773	0.8433
R-HSA-427601	Multifunctional anion exchangers	-0.148888	0.691162	0.84005
R-HSA-430039	mRNA decay by 5' to 3' exoribonuclease	-0.5905	0.2481	0.8386
R-HSA-9839406	TGFBR3 regulates activin signaling	-0.318099	0.5194	0.837499
R-HSA-166020	Transfer of LPS from LBP carrier to CD14	-0.669783	0.1634	0.833183
R-HSA-8941237	Invadopodia formation	-0.508431	0.3179	0.826331
R-HSA-77305	Beta oxidation of palmitoyl-CoA to myristoyl-CoA	-0.585125	0.2243	0.809425
R-HSA-111452	Activation and oligomerization of BAK protein	-0.476155	0.326	0.802155
R-HSA-112303	Electric Transmission Across Gap Junctions	-0.4232	0.378408	0.801608
R-HSA-112307	Transmission across Electrical Synapses	-0.4232	0.378408	0.801608
R-HSA-1299308	Tandem of pore domain in a weak inwardly rectifying K+ channels (TWIK)	-0.4512	0.3294	0.7806
R-HSA-3000497	Scavenging by Class H Receptors	-0.618113	0.1619	0.780013
R-HSA-629597	Highly calcium permeable nicotinic acetylcholine receptors	-0.1844	0.5908	0.7752
R-HSA-9619483	Activation of AMPK downstream of NMDARs	-0.5456	0.2182	0.7638
R-HSA-209822	Glycoprotein hormones	-0.190252	0.5671	0.757352
R-HSA-1483101	Synthesis of PS	-0.163356	0.5889	0.752256
R-HSA-174362	Transport and synthesis of PAPS	-0.4762	0.268041	0.744241
R-HSA-71737	Pyrophosphate hydrolysis	-0.756724	-0.01432	0.742404
R-HSA-209905	Catecholamine biosynthesis	-0.319151	0.4231	0.742251
R-HSA-1236973	Cross-presentation of particulate exogenous antigens (phagosomes)	-0.485805	0.2558	0.741605
R-HSA-888593	Reuptake of GABA	-0.4316	0.3065	0.7381
R-HSA-72731	Recycling of eIF2:GDP	-0.56	0.1777	0.7377
R-HSA-163754	Insulin effects increased synthesis of Xylulose-5-Phosphate	-0.25087	0.4864	0.73727
R-HSA-6803544	Ion influx/efflux at host-pathogen interface	-0.503132	0.2293	0.732432
R-HSA-167826	The fatty acid cycling model	0.0291215	0.7485	0.719379
R-HSA-193993	Mineralocorticoid biosynthesis	-0.4043	0.3063	0.7106
R-HSA-8964046	VLDL clearance	-0.407389	0.3022	0.709589
R-HSA-75108	Activation, myristolyation of BID and translocation to mitochondria	-0.481833	0.2128	0.694633
R-HSA-140179	Amine Oxidase reactions	-0.1631	0.5234	0.6865
R-HSA-376172	DSCAM interactions	-0.1348	0.5504	0.6852
R-HSA-5652227	Fructose biosynthesis	-0.694	-0.009408	0.684592
R-HSA-2022377	Metabolism of Angiotensinogen to Angiotensins	-0.3807	0.2984	0.6791
R-HSA-77288	mitochondrial fatty acid beta-oxidation of unsaturated fatty acids	-0.4108	0.2607	0.6715
R-HSA-2855086	Ficolins bind to repetitive carbohydrate structures on the target cell surface	-0.768424	-0.0975	0.670924
R-HSA-9856872	Malate-aspartate shuttle	-0.2898	0.379	0.6688
R-HSA-500753	Pyrimidine biosynthesis	-0.260179	0.3974	0.657579
R-HSA-5661231	Metallothioneins bind metals	-0.5491	0.107	0.6561
R-HSA-5576890	Phase 3 - rapid repolarisation	-0.3761	0.279185	0.655285
R-HSA-72689	Formation of a pool of free 40S subunits	-0.4595	0.1957	0.6552
R-HSA-72706	GTP hydrolysis and joining of the 60S ribosomal subunit	-0.4655	0.1863	0.6518
R-HSA-9013425	RHOT1 GTPase cycle	-0.383576	0.2673	0.650876
R-HSA-629587	Highly sodium permeable postsynaptic acetylcholine nicotinic receptors	-0.3902	0.2601	0.6503
R-HSA-8939256	RUNX1 regulates transcription of genes involved in WNT signaling	-0.4715	0.1781	0.6496
R-HSA-390651	Dopamine receptors	-0.09873	0.549	0.64773
R-HSA-196836	Vitamin C (ascorbate) metabolism	-0.4716	0.1739	0.6455
R-HSA-111957	Cam-PDE 1 activation	-0.0662349	0.578947	0.645182
R-HSA-196783	Coenzyme A biosynthesis	-0.453899	0.1866	0.640499
R-HSA-844623	The IPAF inflammasome	-0.434539	0.2	0.634539
R-HSA-72613	Eukaryotic Translation Initiation	-0.458	0.1749	0.6329
R-HSA-72737	Cap-dependent Translation Initiation	-0.458	0.1749	0.6329
R-HSA-428359	Insulin-like Growth Factor-2 mRNA Binding Proteins (IGF2BPs/IMPs/VICKZs) bind RNA	-0.576709	0.05558	0.632289
R-HSA-5576894	Phase 1 - inactivation of fast Na+ channels	-0.2876	0.344127	0.631726
R-HSA-5627083	RHO GTPases regulate CFTR trafficking	-0.5337	0.09782	0.63152
R-HSA-8931987	RUNX1 regulates estrogen receptor mediated transcription	-0.4525	0.1778	0.6303
R-HSA-156827	L13a-mediated translational silencing of Ceruloplasmin expression	-0.4625	0.1668	0.6293
R-HSA-9013419	RHOT2 GTPase cycle	-0.323632	0.3046	0.628232
R-HSA-418359	Reduction of cytosolic Ca++ levels	-0.5458	0.07763	0.62343
R-HSA-9014843	Interleukin-33 signaling	-0.0817949	0.5413	0.623095
R-HSA-5221030	TET1,2,3 and TDG demethylate DNA	-0.467206	0.1556	0.622806
R-HSA-8964315	G beta:gamma signalling through BTK	-0.394138	0.2221	0.616238
R-HSA-389542	NADPH regeneration	-0.6738	-0.05904	0.61476
R-HSA-156902	Peptide chain elongation	-0.4621	0.1522	0.6143
R-HSA-2408557	Selenocysteine synthesis	-0.4562	0.1578	0.614
R-HSA-9033807	ABO blood group biosynthesis	-0.36211	0.247	0.60911
R-HSA-844455	The NLRP1 inflammasome	-0.58509	0.02239	0.607479
R-HSA-1799339	SRP-dependent cotranslational protein targeting to membrane	-0.4716	0.1355	0.6071
R-HSA-9715370	Miro GTPase Cycle	-0.315892	0.2901	0.605992
R-HSA-72764	Eukaryotic Translation Termination	-0.4588	0.1436	0.6024
R-HSA-156842	Eukaryotic Translation Elongation	-0.4625	0.1381	0.6006
R-HSA-74217	Purine salvage	-0.5628	0.03769	0.60049
R-HSA-211979	Eicosanoids	-0.397	0.198684	0.595684
R-HSA-629594	Highly calcium permeable postsynaptic nicotinic acetylcholine receptors	-0.3076	0.2865	0.5941
R-HSA-210991	Basigin interactions	-0.336905	0.2539	0.590805
R-HSA-9768777	Regulation of NPAS4 gene transcription	-0.5792	0.008674	0.587874
R-HSA-9749641	Aspirin ADME	-0.2693	0.3183	0.5876
R-HSA-204626	Hypusine synthesis from eIF5A-lysine	-0.506966	0.08002	0.586986
R-HSA-1566977	Fibronectin matrix formation	-0.442748	0.1438	0.586548
R-HSA-2408550	Metabolism of ingested H2SeO4 and H2SeO3 into H2Se	-0.5925	-0.006988	0.585512
R-HSA-9013957	TLR3-mediated TICAM1-dependent programmed cell death	-0.4013	0.1814	0.5827
R-HSA-170660	Adenylate cyclase activating pathway	-0.02804	0.5541	0.58214
R-HSA-2562578	TRIF-mediated programmed cell death	-0.3692	0.2128	0.582
R-HSA-72695	Formation of the ternary complex, and subsequently, the 43S complex	-0.4513	0.1294	0.5807
R-HSA-380095	Tachykinin receptors bind tachykinins	-0.468261	0.1062	0.574461
R-HSA-72702	Ribosomal scanning and start codon recognition	-0.4447	0.1245	0.5692
R-HSA-187042	TRKA activation by NGF	-0.481	0.0878	0.5688
R-HSA-170670	Adenylate cyclase inhibitory pathway	-0.09799	0.4697	0.56769
R-HSA-8948700	Competing endogenous RNAs (ceRNAs) regulate PTEN translation	-0.447	0.12	0.567
R-HSA-162699	Synthesis of dolichyl-phosphate mannose	-0.7963	-0.2297	0.5666
R-HSA-975956	Nonsense Mediated Decay (NMD) independent of the Exon Junction Complex (EJC)	-0.4614	0.1024	0.5638
R-HSA-422085	Synthesis, secretion, and deacylation of Ghrelin	-0.2835	0.2782	0.5617
R-HSA-5660526	Response to metal ions	-0.4619	0.09823	0.56013
R-HSA-77285	Beta oxidation of myristoyl-CoA to lauroyl-CoA	-0.366841	0.1921	0.558941
R-HSA-1306955	GRB7 events in ERBB2 signaling	-0.426008	0.1312	0.557208
R-HSA-9754706	Atorvastatin ADME	-0.4406	0.1165	0.5571
R-HSA-72649	Translation initiation complex formation	-0.4454	0.1111	0.5565
R-HSA-75892	Platelet Adhesion to exposed collagen	-0.4273	0.1265	0.5538
R-HSA-8964058	HDL remodeling	-0.289214	0.2643	0.553514
R-HSA-425381	Bicarbonate transporters	-0.0985088	0.452	0.550509
R-HSA-72662	Activation of the mRNA upon binding of the cap-binding complex and eIFs, and subsequent binding to 43S	-0.4437	0.1057	0.5494
R-HSA-8875513	MET interacts with TNS proteins	-0.3575	0.1918	0.5493
R-HSA-9854909	Regulation of MITF-M dependent genes involved in invasion	-0.191238	0.3573	0.548538
R-HSA-964975	Vitamin B6 activation to pyridoxal phosphate	-0.0183593	0.529	0.547359
R-HSA-9840373	Cellular response to mitochondrial stress	-0.4781	0.06764	0.54574
R-HSA-9759811	Regulation of CDH11 mRNA translation by microRNAs	-0.4307	0.1148	0.5455
R-HSA-428890	Role of ABL in ROBO-SLIT signaling	-0.252059	0.2913	0.543359
R-HSA-426496	Post-transcriptional silencing by small RNAs	-0.4337	0.108	0.5417
R-HSA-73614	Pyrimidine salvage	-0.363202	0.1766	0.539802
R-HSA-8949275	RUNX3 Regulates Immune Response and Cell Migration	-0.35721	0.1824	0.53961
R-HSA-1300645	Acrosome Reaction and Sperm:Oocyte Membrane Binding	-0.396072	0.1417	0.537772
R-HSA-5660489	MTF1 activates gene expression	-0.4669	0.06941	0.53631
R-HSA-111457	Release of apoptotic factors from the mitochondria	-0.3232	0.2102	0.5334
R-HSA-9768778	Regulation of NPAS4 mRNA translation	-0.416	0.1158	0.5318
R-HSA-193681	Ceramide signalling	-0.4137	0.1175	0.5312
R-HSA-71240	Tryptophan catabolism	-0.163812	0.366	0.529812
R-HSA-211958	Miscellaneous substrates	-0.2971	0.23098	0.52808
R-HSA-177128	Conjugation of salicylate with glycine	0.159804	0.687	0.527196
R-HSA-383280	Nuclear Receptor transcription pathway	-0.4146	0.112	0.5266
R-HSA-8964011	HDL clearance	-0.2165	0.3098	0.5263
R-HSA-8956321	Nucleotide salvage	-0.3841	0.1417	0.5258
R-HSA-8857538	PTK6 promotes HIF1A stabilization	-0.4168	0.1089	0.5257
R-HSA-622323	Presynaptic nicotinic acetylcholine receptors	-0.1636	0.3621	0.5257
R-HSA-9633012	Response of EIF2AK4 (GCN2) to amino acid deficiency	-0.3919	0.1328	0.5247
R-HSA-416700	Other semaphorin interactions	-0.2918	0.2308	0.5226
R-HSA-8963676	Intestinal absorption	-0.0422403	0.4802	0.52244
R-HSA-8981373	Intestinal hexose absorption	-0.0422403	0.4802	0.52244
R-HSA-1614603	Cysteine formation from homocysteine	-0.601651	-0.07984	0.521811
R-HSA-211935	Fatty acids	-0.3505	0.170426	0.520926
R-HSA-111453	BH3-only proteins associate with and inactivate anti-apoptotic BCL-2 members	-0.458451	0.06165	0.520101
R-HSA-9711097	Cellular response to starvation	-0.3665	0.15	0.5165
R-HSA-181431	Acetylcholine binding and downstream events	-0.2635	0.2524	0.5159
R-HSA-622327	Postsynaptic nicotinic acetylcholine receptors	-0.2635	0.2524	0.5159
R-HSA-8866910	TFAP2 (AP-2) family regulates transcription of growth factors and their receptors	-0.4249	0.08883	0.51373
R-HSA-418217	G beta:gamma signalling through PLC beta	-0.345761	0.1677	0.513461
R-HSA-500657	Presynaptic function of Kainate receptors	-0.345761	0.1677	0.513461
R-HSA-198765	Signalling to ERK5	-0.3597	0.1528	0.5125
R-HSA-140834	Extrinsic Pathway of Fibrin Clot Formation	-0.2066	0.3056	0.5122
R-HSA-9827857	Specification of primordial germ cells	-0.3508	0.1585	0.5093
R-HSA-8949215	Mitochondrial calcium ion transport	-0.426583	0.08216	0.508743
R-HSA-6806664	Metabolism of vitamin K	-0.380379	0.1271	0.507479
R-HSA-1663150	The activation of arylsulfatases	-0.3663	0.1403	0.5066
R-HSA-166662	Lectin pathway of complement activation	-0.533891	-0.03153	0.502361
R-HSA-2408522	Selenoamino acid metabolism	-0.4122	0.0896	0.5018
R-HSA-8852405	Signaling by MST1	0.03165	0.532779	0.501129
R-HSA-5662702	Melanin biosynthesis	0.0208068	0.5173	0.496493
R-HSA-964827	Progressive trimming of alpha-1,2-linked mannose residues from Man9/8/7GlcNAc2 to produce Man5GlcNAc2	-0.0752643	0.4156	0.490864
R-HSA-1222556	ROS and RNS production in phagocytes	-0.290636	0.1975	0.488136
R-HSA-400042	Adrenaline,noradrenaline inhibits insulin secretion	-0.372082	0.1139	0.485982
R-HSA-2160916	Hyaluronan uptake and degradation	-0.157684	0.328	0.485684
R-HSA-429914	Deadenylation-dependent mRNA decay	-0.4177	0.06777	0.48547
R-HSA-5660668	CLEC7A/inflammasome pathway	-0.392	0.09055	0.48255
R-HSA-8964539	Glutamate and glutamine metabolism	-0.2683	0.2136	0.4819
R-HSA-351200	Interconversion of polyamines	-0.3756	0.1063	0.4819
R-HSA-9730628	Sensory perception of salty taste	-0.220881	0.2608	0.481681
R-HSA-1296061	HCN channels	-0.302578	0.177	0.479579
R-HSA-9603505	NTRK3 as a dependence receptor	-0.4003	0.07846	0.47876
R-HSA-8963896	HDL assembly	-0.364941	0.1124	0.477341
R-HSA-977443	GABA receptor activation	-0.264774	0.2125	0.477274
R-HSA-8950505	Gene and protein expression by JAK-STAT signaling after Interleukin-12 stimulation	-0.4149	0.06215	0.47705
R-HSA-8964208	Phenylalanine metabolism	-0.5401	-0.06351	0.47659
R-HSA-196843	Vitamin B2 (riboflavin) metabolism	-0.0640301	0.4125	0.47653
R-HSA-8849473	PTK6 Expression	-0.3962	0.07943	0.47563
R-HSA-9757110	Prednisone ADME	-0.02324	0.4513	0.47454
R-HSA-9759218	Cobalamin (Cbl) metabolism	-0.4467	0.02658	0.47328
R-HSA-205017	NFG and proNGF binds to p75NTR	-0.4288	0.04341	0.47221
R-HSA-5621480	Dectin-2 family	-0.407655	0.06341	0.471065
R-HSA-1307965	betaKlotho-mediated ligand binding	0.140859	0.6117	0.470841
R-HSA-425561	Sodium/Calcium exchangers	-0.322	0.1471	0.4691
R-HSA-428543	Inactivation of CDC42 and RAC1	-0.3967	0.06992	0.46662
R-HSA-190377	FGFR2b ligand binding and activation	-0.4068	0.05967	0.46647
R-HSA-209563	Axonal growth stimulation	-0.4228	0.04333	0.46613
R-HSA-75109	Triglyceride biosynthesis	-0.2251	0.2364	0.4615
R-HSA-211163	AKT-mediated inactivation of FOXO1A	-0.387413	0.07003	0.457443
R-HSA-927802	Nonsense-Mediated Decay (NMD)	-0.4069	0.05052	0.45742
R-HSA-975957	Nonsense Mediated Decay (NMD) enhanced by the Exon Junction Complex (EJC)	-0.4069	0.05052	0.45742
R-HSA-216083	Integrin cell surface interactions	-0.3532	0.1038	0.457
R-HSA-8854521	Interaction between PHLDA1 and AURKA	-0.1769	0.2799	0.4568
R-HSA-9841251	Mitochondrial unfolded protein response (UPRmt)	-0.3503	0.1059	0.4562
R-HSA-8963693	Aspartate and asparagine metabolism	-0.2769	0.178629	0.455529
R-HSA-426048	Arachidonate production from DAG	-0.5516	-0.0969531	0.454647
R-HSA-9706374	FLT3 signaling through SRC family kinases	-0.4244	0.03024	0.45464
R-HSA-70263	Gluconeogenesis	-0.3741	0.07856	0.45266
R-HSA-381676	Glucagon-like Peptide-1 (GLP1) regulates insulin secretion	-0.330759	0.1217	0.452459
R-HSA-166665	Terminal pathway of complement	-0.1007	0.3515	0.4522
R-HSA-392170	ADP signalling through P2Y purinoceptor 12	-0.370181	0.08201	0.452191
R-HSA-8943723	Regulation of PTEN mRNA translation	-0.4183	0.03369	0.45199
R-HSA-196819	Vitamin B1 (thiamin) metabolism	-0.1612	0.2898	0.451
R-HSA-380612	Metabolism of serotonin	0.213807	0.664	0.450193
R-HSA-9017802	Noncanonical activation of NOTCH3	-0.5244	-0.07537	0.44903
R-HSA-8963901	Chylomicron remodeling	-0.267672	0.1808	0.448472
R-HSA-9768759	Regulation of NPAS4 gene expression	-0.4281	0.02026	0.44836
R-HSA-428930	Thromboxane signalling through TP receptor	-0.424	0.02375	0.44775
R-HSA-9860276	SLC15A4:TASL-dependent IRF5 activation	-0.3695	0.07769	0.44719
R-HSA-399955	SEMA3A-Plexin repulsion signaling by inhibiting Integrin adhesion	-0.3987	0.04665	0.44535
R-HSA-198693	AKT phosphorylates targets in the nucleus	-0.367553	0.07614	0.443693
R-HSA-166786	Creation of C4 and C2 activators	-0.464	-0.02215	0.44185
R-HSA-8949613	Cristae formation	-0.2669	0.1745	0.4414
R-HSA-77595	Processing of Intronless Pre-mRNAs	-0.4332	0.007216	0.440416
R-HSA-173623	Classical antibody-mediated complement activation	-0.4649	-0.02499	0.43991
R-HSA-1483148	Synthesis of PG	-0.204662	0.2352	0.439862
R-HSA-3134963	DEx/H-box helicases activate type I IFN and inflammatory cytokines production	-0.4258	0.01301	0.43881
R-HSA-198933	Immunoregulatory interactions between a Lymphoid and a non-Lymphoid cell	-0.3319	0.1055	0.4374
R-HSA-9820865	Z-decay: degradation of maternal mRNAs by zygotically expressed factors	-0.4462	-0.009199	0.437001
R-HSA-70268	Pyruvate metabolism	-0.336	0.1006	0.4366
R-HSA-8963898	Plasma lipoprotein assembly	-0.312081	0.1238	0.435881
R-HSA-9619229	Activation of RAC1 downstream of NMDARs	-0.391357	0.04435	0.435707
R-HSA-420499	Class C/3 (Metabotropic glutamate/pheromone receptors)	-0.0072589	0.4278	0.435059
R-HSA-174437	Removal of the Flap Intermediate from the C-strand	-0.317796	0.1171	0.434896
R-HSA-977444	GABA B receptor activation	-0.245234	0.1882	0.433434
R-HSA-991365	Activation of GABAB receptors	-0.245234	0.1882	0.433434
R-HSA-163359	Glucagon signaling in metabolic regulation	-0.325719	0.1076	0.433319
R-HSA-5635851	GLI proteins bind promoters of Hh responsive genes to promote transcription	0.05501	0.4878	0.43279
R-HSA-4090294	SUMOylation of intracellular receptors	-0.3698	0.06249	0.43229
R-HSA-140342	Apoptosis induced DNA fragmentation	-0.3699	0.05822	0.42812
R-HSA-9820841	M-decay: degradation of maternal mRNAs by maternally stored factors	-0.4143	0.01268	0.42698
R-HSA-429947	Deadenylation of mRNA	-0.4259	0.0006357	0.426536
R-HSA-416572	Sema4D induced cell migration and growth-cone collapse	-0.362241	0.06426	0.426501
R-HSA-2142845	Hyaluronan metabolism	-0.12638	0.2998	0.42618
R-HSA-3000471	Scavenging by Class B Receptors	-0.324834	0.1009	0.425734
R-HSA-9027277	Erythropoietin activates Phospholipase C gamma (PLCG)	-0.3603	0.06407	0.42437
R-HSA-1296041	Activation of G protein gated Potassium channels	-0.295725	0.1285	0.424225
R-HSA-1296059	G protein gated Potassium channels	-0.295725	0.1285	0.424225
R-HSA-997272	Inhibition of voltage gated Ca2+ channels via Gbeta/gamma subunits	-0.295725	0.1285	0.424225
R-HSA-2730905	Role of LAT2/NTAL/LAB on calcium mobilization	-0.3638	0.05962	0.42342
R-HSA-5625970	RHO GTPases activate KTN1	-0.394	0.02894	0.42294
R-HSA-9652282	Drug-mediated inhibition of ERBB2 signaling	-0.3766	0.04576	0.42236
R-HSA-8951911	RUNX3 regulates RUNX1-mediated transcription	-0.448324	-0.02599	0.422334
R-HSA-9020591	Interleukin-12 signaling	-0.3848	0.03716	0.42196
R-HSA-9639288	Amino acids regulate mTORC1	-0.2976	0.1243	0.4219
R-HSA-6799990	Metal sequestration by antimicrobial proteins	-0.257923	0.1638	0.421723
R-HSA-194306	Neurophilin interactions with VEGF and VEGFR	-0.373193	0.04711	0.420303
R-HSA-442729	CREB1 phosphorylation through the activation of CaMKII/CaMKK/CaMKIV cascasde	-0.306212	0.1138	0.420012
R-HSA-351143	Agmatine biosynthesis	0.1657	0.5853	0.4196
R-HSA-933543	NF-kB activation through FADD/RIP-1 pathway mediated by caspase-8 and -10	-0.3891	0.03006	0.41916
R-HSA-975574	Reactions specific to the hybrid N-glycan synthesis pathway	-0.02334	0.3939	0.41724
R-HSA-9840310	Glycosphingolipid catabolism	-0.284202	0.1315	0.415702
R-HSA-171306	Packaging Of Telomere Ends	-0.2957	0.1184	0.4141
R-HSA-9027283	Erythropoietin activates STAT5	-0.4141	-3.465e-05	0.414065
R-HSA-389357	CD28 dependent PI3K/Akt signaling	-0.3457	0.06824	0.41394
R-HSA-73843	5-Phosphoribose 1-diphosphate biosynthesis	-0.345968	0.0676	0.413568
R-HSA-9839383	TGFBR3 PTM regulation	-0.52562	-0.1122	0.41342
R-HSA-111932	CaMK IV-mediated phosphorylation of CREB	-0.345011	0.06775	0.412761
R-HSA-975578	Reactions specific to the complex N-glycan synthesis pathway	-0.265716	0.1463	0.412016
R-HSA-110330	Recognition and association of DNA glycosylase with site containing an affected purine	-0.3012	0.1105	0.4117
R-HSA-110331	Cleavage of the damaged purine	-0.3012	0.1105	0.4117
R-HSA-73927	Depurination	-0.3012	0.1105	0.4117
R-HSA-77310	Beta oxidation of lauroyl-CoA to decanoyl-CoA-CoA	-0.421408	-0.009914	0.411494
R-HSA-6790901	rRNA modification in the nucleus and cytosol	-0.3488	0.06228	0.41108
R-HSA-964739	N-glycan trimming and elongation in the cis-Golgi	-0.0325073	0.3771	0.409607
R-HSA-77348	Beta oxidation of octanoyl-CoA to hexanoyl-CoA	-0.519245	-0.1099	0.409345
R-HSA-8964616	G beta:gamma signalling through CDC42	-0.384961	0.02382	0.408781
R-HSA-389359	CD28 dependent Vav1 pathway	-0.391561	0.01586	0.407421
R-HSA-5686938	Regulation of TLR by endogenous ligand	-0.4312	-0.02547	0.40573
R-HSA-174414	Processive synthesis on the C-strand of the telomere	-0.2825	0.1231	0.4056
R-HSA-190241	FGFR2 ligand binding and activation	-0.3808	0.02436	0.40516
R-HSA-444473	Formyl peptide receptors bind formyl peptides and many other ligands	-0.3742	0.03073	0.40493
R-HSA-392451	G beta:gamma signalling through PI3Kgamma	-0.371233	0.03159	0.402823
R-HSA-2243919	Crosslinking of collagen fibrils	-0.349883	0.05245	0.402333
R-HSA-400685	Sema4D in semaphorin signaling	-0.352903	0.04913	0.402033
R-HSA-1462054	Alpha-defensins	-0.3093	0.0923	0.4016
R-HSA-947581	Molybdenum cofactor biosynthesis	-0.06422	0.3371	0.40132
R-HSA-433137	Sodium-coupled sulphate, di- and tri-carboxylate transporters	-0.2115	0.1898	0.4013
R-HSA-77346	Beta oxidation of decanoyl-CoA to octanoyl-CoA-CoA	-0.509379	-0.1088	0.400579
R-HSA-448706	Interleukin-1 processing	-0.3652	0.03493	0.40013
R-HSA-9861718	Regulation of pyruvate metabolism	-0.3076	0.09196	0.39956
R-HSA-194313	VEGF ligand-receptor interactions	-0.3264	0.07189	0.39829
R-HSA-195399	VEGF binds to VEGFR leading to receptor dimerization	-0.3264	0.07189	0.39829
R-HSA-109703	PKB-mediated events	-0.2645	0.133686	0.398186
R-HSA-165160	PDE3B signalling	-0.2645	0.133686	0.398186
R-HSA-197264	Nicotinamide salvaging	-0.176815	0.2213	0.398115
R-HSA-110328	Recognition and association of DNA glycosylase with site containing an affected pyrimidine	-0.2848	0.1128	0.3976
R-HSA-110329	Cleavage of the damaged pyrimidine	-0.2848	0.1128	0.3976
R-HSA-73928	Depyrimidination	-0.2848	0.1128	0.3976
R-HSA-9818025	NFE2L2 regulating TCA cycle genes	-0.456371	-0.05919	0.397181
R-HSA-174430	Telomere C-strand synthesis initiation	-0.330957	0.06587	0.396827
R-HSA-9857377	Regulation of MITF-M-dependent genes involved in lysosome biogenesis and autophagy	-0.283394	0.1134	0.396794
R-HSA-8874081	MET activates PTK2 signaling	-0.3535	0.04326	0.39676
R-HSA-418592	ADP signalling through P2Y purinoceptor 1	-0.3111	0.08482	0.39592
R-HSA-428643	Organic anion transporters	-0.0516775	0.3442	0.395877
R-HSA-1296065	Inwardly rectifying K+ channels	-0.253545	0.1422	0.395745
R-HSA-198323	AKT phosphorylates targets in the cytosol	-0.2996	0.09573	0.39533
R-HSA-164378	PKA activation in glucagon signalling	-0.321852	0.07323	0.395082
R-HSA-70688	Proline catabolism	-0.1015	0.2915	0.393
R-HSA-75158	TRAIL signaling	-0.3168	0.07504	0.39184
R-HSA-380108	Chemokine receptors bind chemokines	-0.2703	0.1214	0.3917
R-HSA-211957	Aromatic amines can be N-hydroxylated or N-dealkylated by CYP1A2	-0.0671	0.3226	0.3897
R-HSA-2168880	Scavenging of heme from plasma	-0.2362	0.1532	0.3894
R-HSA-73929	Base-Excision Repair, AP Site Formation	-0.2884	0.1006	0.389
R-HSA-8866423	VLDL assembly	-0.264846	0.1233	0.388146
R-HSA-8964038	LDL clearance	-0.3286	0.05936	0.38796
R-HSA-163358	PKA-mediated phosphorylation of key metabolic factors	-0.360792	0.02707	0.387862
R-HSA-74713	IRS activation	-0.2532	0.1345	0.3877
R-HSA-1251932	PLCG1 events in ERBB2 signaling	-0.382369	0.004446	0.386815
R-HSA-2024101	CS/DS degradation	-0.366187	0.0204	0.386587
R-HSA-434316	Fatty Acids bound to GPR40 (FFAR1) regulate insulin secretion	-0.3972	-0.0119782	0.385222
R-HSA-397795	G-protein beta:gamma signalling	-0.373289	0.01187	0.385159
R-HSA-111931	PKA-mediated phosphorylation of CREB	-0.337552	0.04731	0.384862
R-HSA-162710	Synthesis of glycosylphosphatidylinositol (GPI)	-0.2099	0.1746	0.3845
R-HSA-8847993	ERBB2 Activates PTK6 Signaling	-0.392543	-0.008143	0.3844
R-HSA-9854311	Maturation of TCA enzymes and regulation of TCA cycle	-0.4286	-0.0443	0.3843
R-HSA-1963642	PI3K events in ERBB2 signaling	-0.373257	0.01092	0.384177
R-HSA-112311	Neurotransmitter clearance	-0.122304	0.2616	0.383904
R-HSA-611105	Respiratory electron transport	-0.2894	0.0942	0.3836
R-HSA-877300	Interferon gamma signaling	-0.3591	0.02359	0.38269
R-HSA-9708296	tRNA-derived small RNA (tsRNA or tRNA-related fragment, tRF) biogenesis	-0.3719	0.01053	0.38243
R-HSA-5627117	RHO GTPases Activate ROCKs	-0.331252	0.05103	0.382282
R-HSA-432040	Vasopressin regulates renal water homeostasis via Aquaporins	-0.292414	0.08953	0.381944
R-HSA-1358803	Downregulation of ERBB2:ERBB3 signaling	-0.3364	0.04552	0.38192
R-HSA-8866376	Reelin signalling pathway	-0.223469	0.1583	0.381769
R-HSA-3000480	Scavenging by Class A Receptors	-0.262223	0.1189	0.381123
R-HSA-209931	Serotonin and melatonin biosynthesis	-0.1039	0.2771	0.381
R-HSA-389977	Post-chaperonin tubulin folding pathway	-0.342084	0.03868	0.380764
R-HSA-417973	Adenosine P1 receptors	-0.2821	0.09829	0.38039
R-HSA-844615	The AIM2 inflammasome	-0.2544	0.1254	0.3798
R-HSA-163615	PKA activation	-0.333288	0.04639	0.379678
R-HSA-1251985	Nuclear signaling by ERBB4	-0.3328	0.04678	0.37958
R-HSA-212718	EGFR interacts with phospholipase C-gamma	-0.365952	0.01329	0.379242
R-HSA-420092	Glucagon-type ligand receptors	-0.286572	0.09264	0.379212
R-HSA-1810476	RIP-mediated NFkB activation via ZBP1	-0.3864	-0.007221	0.379179
R-HSA-447115	Interleukin-12 family signaling	-0.3735	0.00485	0.37835
R-HSA-9734091	Drug-mediated inhibition of MET activation	-0.2474	0.13	0.3774
R-HSA-193697	p75NTR regulates axonogenesis	-0.3014	0.07574	0.37714
R-HSA-392518	Signal amplification	-0.3506	0.02648	0.37708
R-HSA-73621	Pyrimidine catabolism	-0.0475093	0.3293	0.376809
R-HSA-190371	FGFR3b ligand binding and activation	-0.2388	0.1377	0.3765
R-HSA-198203	PI3K/AKT activation	-0.273332	0.1031	0.376432
R-HSA-389599	Alpha-oxidation of phytanate	-0.28	0.09614	0.37614
R-HSA-879518	Transport of organic anions	-0.174897	0.1996	0.374497
R-HSA-9758920	Formation of lateral plate mesoderm	0.0750869	0.4495	0.374413
R-HSA-1483213	Synthesis of PE	-0.271593	0.1028	0.374393
R-HSA-77350	Beta oxidation of hexanoyl-CoA to butanoyl-CoA	-0.515266	-0.1415	0.373766
R-HSA-5666185	RHO GTPases Activate Rhotekin and Rhophilins	-0.298499	0.07514	0.373639
R-HSA-9925561	Developmental Lineage of Pancreatic Acinar Cells	-0.1894	0.1841	0.3735
R-HSA-9634597	GPER1 signaling	-0.3325	0.04096	0.37346
R-HSA-6798163	Choline catabolism	0.09294	0.4663	0.37336
R-HSA-179812	GRB2 events in EGFR signaling	-0.386513	-0.01347	0.373043
R-HSA-6791226	Major pathway of rRNA processing in the nucleolus and cytosol	-0.3068	0.06568	0.37248
R-HSA-3928662	EPHB-mediated forward signaling	-0.28835	0.08384	0.37219
R-HSA-110357	Displacement of DNA glycosylase by APEX1	-0.350409	0.02111	0.371519
R-HSA-202430	Translocation of ZAP-70 to Immunological synapse	-0.4412	-0.06993	0.37127
R-HSA-1963640	GRB2 events in ERBB2 signaling	-0.388348	-0.01734	0.371007
R-HSA-6785631	ERBB2 Regulates Cell Motility	-0.378113	-0.007175	0.370938
R-HSA-9013507	NOTCH3 Activation and Transmission of Signal to the Nucleus	-0.3769	-0.006091	0.370809
R-HSA-380972	Energy dependent regulation of mTOR by LKB1-AMPK	-0.2814	0.08935	0.37075
R-HSA-1461973	Defensins	-0.2267	0.1439	0.3706
R-HSA-6814848	Glycerophospholipid catabolism	-0.253524	0.1168	0.370324
R-HSA-442720	CREB1 phosphorylation through the activation of Adenylate Cyclase	-0.36192	0.007548	0.369468
R-HSA-4641263	Regulation of FZD by ubiquitination	-0.2758	0.09238	0.36818
R-HSA-392851	Prostacyclin signalling through prostacyclin receptor	-0.184202	0.1825	0.366702
R-HSA-9629569	Protein hydroxylation	-0.4031	-0.03672	0.36638
R-HSA-9830674	Formation of the ureteric bud	-0.2941	0.07193	0.36603
R-HSA-380615	Serotonin clearance from the synaptic cleft	0.205912	0.5713	0.365388
R-HSA-193692	Regulated proteolysis of p75NTR	-0.4067	-0.04141	0.36529
R-HSA-8963691	Phenylalanine and tyrosine metabolism	-0.3399	0.02525	0.36515
R-HSA-8941284	RUNX2 regulates chondrocyte maturation	-0.3169	0.04772	0.36462
R-HSA-445144	Signal transduction by L1	-0.356807	0.007694	0.364501
R-HSA-167060	NGF processing	-0.333792	0.03003	0.363822
R-HSA-9036866	Expression and Processing of Neurotrophins	-0.333792	0.03003	0.363822
R-HSA-9865881	Complex III assembly	-0.3543	0.009291	0.363591
R-HSA-1296072	Voltage gated Potassium channels	-0.0716331	0.291878	0.363511
R-HSA-2022857	Keratan sulfate degradation	-0.173922	0.1889	0.362822
R-HSA-3322077	Glycogen synthesis	-0.3013	0.06124	0.36254
R-HSA-173599	Formation of the active cofactor, UDP-glucuronate	-0.531295	-0.1697	0.361595
R-HSA-418597	G alpha (z) signalling events	-0.299	0.06164	0.36064
R-HSA-9013408	RHOG GTPase cycle	-0.32849	0.0312	0.35969
R-HSA-9664873	Pexophagy	-0.2947	0.06403	0.35873
R-HSA-917977	Transferrin endocytosis and recycling	-0.2169	0.1417	0.3586
R-HSA-9836573	Mitochondrial RNA degradation	-0.37897	-0.02046	0.35851
R-HSA-8952158	RUNX3 regulates BCL2L11 (BIM) transcription	-0.373228	-0.01518	0.358048
R-HSA-139910	Activation of BMF and translocation to mitochondria	-0.177379	0.1804	0.357779
R-HSA-8868773	rRNA processing in the nucleus and cytosol	-0.3017	0.05596	0.35766
R-HSA-114604	GPVI-mediated activation cascade	-0.330132	0.02621	0.356342
R-HSA-180336	SHC1 events in EGFR signaling	-0.373603	-0.01747	0.356133
R-HSA-1296067	Potassium transport channels	0.2742	0.6302	0.356
R-HSA-5663213	RHO GTPases Activate WASPs and WAVEs	-0.313601	0.04195	0.355551
R-HSA-9821993	Replacement of protamines by nucleosomes in the male pronucleus	-0.2645	0.09088	0.35538
R-HSA-1483196	PI and PC transport between ER and Golgi membranes	-0.4143	-0.05963	0.35467
R-HSA-8982491	Glycogen metabolism	-0.2732	0.08114	0.35434
R-HSA-9837999	Mitochondrial protein degradation	-0.2942	0.06014	0.35434
R-HSA-9707564	Cytoprotection by HMOX1	-0.337265	0.01644	0.353705
R-HSA-3000157	Laminin interactions	-0.195222	0.1583	0.353522
R-HSA-187024	NGF-independant TRKA activation	-0.4112	-0.0577872	0.353413
R-HSA-112412	SOS-mediated signalling	-0.416	-0.06331	0.35269
R-HSA-389887	Beta-oxidation of pristanoyl-CoA	-0.0003921	0.3517	0.352092
R-HSA-1296052	Ca2+ activated K+ channels	0.192	0.543856	0.351856
R-HSA-418885	DCC mediated attractive signaling	-0.328	0.02381	0.35181
R-HSA-3928665	EPH-ephrin mediated repulsion of cells	-0.287617	0.06385	0.351467
R-HSA-193634	Axonal growth inhibition (RHOA activation)	-0.293	0.05841	0.35141
R-HSA-2179392	EGFR Transactivation by Gastrin	-0.372307	-0.0213	0.351007
R-HSA-6803157	Antimicrobial peptides	-0.2159	0.1342	0.3501
R-HSA-173736	Alternative complement activation	-0.09619	0.2536	0.34979
R-HSA-8866907	Activation of the TFAP2 (AP-2) family of transcription factors	-0.30185	0.04789	0.34974
R-HSA-171319	Telomere Extension By Telomerase	-0.272	0.07736	0.34936
R-HSA-111463	SMAC (DIABLO) binds to IAPs	-0.2959	0.05324	0.34914
R-HSA-111464	SMAC(DIABLO)-mediated dissociation of IAP:caspase complexes	-0.2959	0.05324	0.34914
R-HSA-6806942	MET Receptor Activation	-0.06457	0.283916	0.348486
R-HSA-111469	SMAC, XIAP-regulated apoptotic response	-0.2947	0.05357	0.34827
R-HSA-9753281	Paracetamol ADME	-0.04051	0.305624	0.346134
R-HSA-174411	Polymerase switching on the C-strand of the telomere	-0.285315	0.06049	0.345805
R-HSA-1606322	ZBP1(DAI) mediated induction of type I IFNs	-0.3732	-0.02756	0.34564
R-HSA-8963888	Chylomicron assembly	-0.21994	0.1255	0.34544
R-HSA-163841	Gamma carboxylation, hypusinylation, hydroxylation, and arylsulfatase activation	-0.3468	-0.001532	0.345268
R-HSA-9023661	Biosynthesis of E-series 18(R)-resolvins	-0.141094	0.2032	0.344294
R-HSA-163282	Mitochondrial transcription initiation	-0.36	-0.01572	0.34428
R-HSA-6787639	GDP-fucose biosynthesis	0.0137701	0.3574	0.34363
R-HSA-9027276	Erythropoietin activates Phosphoinositide-3-kinase (PI3K)	-0.270893	0.07238	0.343273
R-HSA-9706369	Negative regulation of FLT3	-0.2576	0.08547	0.34307
R-HSA-75157	FasL/ CD95L signaling	-0.3625	-0.01991	0.34259
R-HSA-8875878	MET promotes cell motility	-0.2853	0.05727	0.34257
R-HSA-1482883	Acyl chain remodeling of DAG and TAG	-0.3288	0.01032	0.33912
R-HSA-112122	ALKBH2 mediated reversal of alkylation damage	-0.4499	-0.1108	0.3391
R-HSA-9035034	RHOF GTPase cycle	-0.269437	0.06877	0.338207
R-HSA-1268020	Mitochondrial protein import	-0.251434	0.08675	0.338184
R-HSA-9670095	Inhibition of DNA recombination at telomere	-0.2949	0.04321	0.33811
R-HSA-1362409	Mitochondrial iron-sulfur cluster biogenesis	-0.5199	-0.1819	0.338
R-HSA-199920	CREB phosphorylation	-0.4196	-0.0823988	0.337201
R-HSA-5627123	RHO GTPases activate PAKs	-0.295485	0.04071	0.336195
R-HSA-392023	Adrenaline signalling through Alpha-2 adrenergic receptor	0.3745	0.7105	0.336
R-HSA-390648	Muscarinic acetylcholine receptors	-0.2252	0.1104	0.3356
R-HSA-375281	Hormone ligand-binding receptors	-0.03579	0.2991	0.33489
R-HSA-210747	Regulation of gene expression in early pancreatic precursor cells	-0.02822	0.306654	0.334874
R-HSA-2214320	Anchoring fibril formation	-0.3946	-0.05998	0.33462
R-HSA-1483191	Synthesis of PC	-0.3953	-0.06101	0.33429
R-HSA-1660514	Synthesis of PIPs at the Golgi membrane	-0.360598	-0.02661	0.333988
R-HSA-1614517	Sulfide oxidation to sulfate	-0.3375	-0.0036474	0.333853
R-HSA-164952	The role of Nef in HIV-1 replication and disease pathogenesis	-0.331225	0.002434	0.333659
R-HSA-8849469	PTK6 Regulates RTKs and Their Effectors AKT1 and DOK1	-0.2916	0.0418	0.3334
R-HSA-425986	Sodium/Proton exchangers	0.115973	0.4493	0.333327
R-HSA-2142850	Hyaluronan biosynthesis and export	-0.03683	0.2962	0.33303
R-HSA-9729555	Sensory perception of sour taste	0.0965042	0.4294	0.332896
R-HSA-9032759	NTRK2 activates RAC1	-0.346376	-0.01411	0.332266
R-HSA-1461957	Beta defensins	0.09046	0.4227	0.33224
R-HSA-909733	Interferon alpha/beta signaling	-0.334	-0.002109	0.331891
R-HSA-419037	NCAM1 interactions	-0.1187	0.2127	0.3314
R-HSA-9018683	Biosynthesis of DPA-derived SPMs	-0.134021	0.1967	0.330721
R-HSA-9025094	Biosynthesis of DPAn-3 SPMs	-0.134021	0.1967	0.330721
R-HSA-390666	Serotonin receptors	-0.573	-0.2423	0.3307
R-HSA-3299685	Detoxification of Reactive Oxygen Species	-0.318498	0.01174	0.330238
R-HSA-9027307	Biosynthesis of maresin-like SPMs	0.2292	0.5593	0.3301
R-HSA-75064	mRNA Editing: A to I Conversion	-0.6124	-0.2825	0.3299
R-HSA-75102	C6 deamination of adenosine	-0.6124	-0.2825	0.3299
R-HSA-77042	Formation of editosomes by ADAR proteins	-0.6124	-0.2825	0.3299
R-HSA-1592389	Activation of Matrix Metalloproteinases	-0.2201	0.1097	0.3298
R-HSA-5674499	Negative feedback regulation of MAPK pathway	-0.435391	-0.1056	0.329791
R-HSA-163316	Mitochondrial transcription termination	-0.04466	0.2847	0.32936
R-HSA-140837	Intrinsic Pathway of Fibrin Clot Formation	-0.158	0.171	0.329
R-HSA-427589	Type II Na+/Pi cotransporters	-0.4524	-0.1235	0.3289
R-HSA-8951936	RUNX3 regulates p14-ARF	-0.291786	0.03706	0.328846
R-HSA-8964026	Chylomicron clearance	-0.235616	0.09302	0.328636
R-HSA-8964043	Plasma lipoprotein clearance	-0.2683	0.06022	0.32852
R-HSA-8941332	RUNX2 regulates genes involved in cell migration	-0.3736	-0.04568	0.32792
R-HSA-77286	mitochondrial fatty acid beta-oxidation of saturated fatty acids	-0.399704	-0.07194	0.327764
R-HSA-111446	Activation of BIM and translocation to mitochondria	-0.1172	0.2104	0.3276
R-HSA-192456	Digestion of dietary lipid	-0.03116	0.2963	0.32746
R-HSA-205043	NRIF signals cell death from the nucleus	-0.3142	0.01305	0.32725
R-HSA-1234158	Regulation of gene expression by Hypoxia-inducible Factor	-0.339121	-0.01206	0.327061
R-HSA-8963899	Plasma lipoprotein remodeling	-0.208757	0.1181	0.326857
R-HSA-5621575	CD209 (DC-SIGN) signaling	-0.3764	-0.04976	0.32664
R-HSA-5658623	FGFRL1 modulation of FGFR1 signaling	-0.254725	0.07159	0.326315
R-HSA-8935690	Digestion	-0.1119	0.2144	0.3263
R-HSA-1660662	Glycosphingolipid metabolism	-0.21559	0.11	0.32559
R-HSA-2029481	FCGR activation	-0.3145	0.01084	0.32534
R-HSA-9018896	Biosynthesis of E-series 18(S)-resolvins	-0.136616	0.1885	0.325116
R-HSA-901032	ER Quality Control Compartment (ERQC)	-0.3181	0.006929	0.325029
R-HSA-198745	Signalling to STAT3	-0.3474	-0.02239	0.32501
R-HSA-187015	Activation of TRKA receptors	-0.4056	-0.0808542	0.324746
R-HSA-2161517	Abacavir transmembrane transport	0.1491	0.473663	0.324563
R-HSA-9032845	Activated NTRK2 signals through CDK5	-0.297487	0.02683	0.324317
R-HSA-1250196	SHC1 events in ERBB2 signaling	-0.356272	-0.03377	0.322502
R-HSA-8876725	Protein methylation	-0.2842	0.03827	0.32247
R-HSA-5625900	RHO GTPases activate CIT	-0.263727	0.05854	0.322267
R-HSA-174824	Plasma lipoprotein assembly, remodeling, and clearance	-0.276	0.0462	0.3222
R-HSA-1482922	Acyl chain remodelling of PI	-0.0684067	0.2537	0.322107
R-HSA-69478	G2/M DNA replication checkpoint	-0.273208	0.04884	0.322048
R-HSA-163765	ChREBP activates metabolic gene expression	-0.143447	0.1786	0.322047
R-HSA-9839397	TGFBR3 regulates FGF2 signaling	-0.2733	0.0479	0.3212
R-HSA-6804115	TP53 regulates transcription of additional cell cycle genes whose exact role in the p53 pathway remain uncertain	-0.3351	-0.01408	0.32102
R-HSA-8955332	Carboxyterminal post-translational modifications of tubulin	-0.233	0.08777	0.32077
R-HSA-190239	FGFR3 ligand binding and activation	-0.2622	0.05849	0.32069
R-HSA-190372	FGFR3c ligand binding and activation	-0.2622	0.05849	0.32069
R-HSA-2022923	Dermatan sulfate biosynthesis	-0.307067	0.01356	0.320627
R-HSA-379398	Enzymatic degradation of Dopamine by monoamine oxidase	-0.136394	0.184	0.320394
R-HSA-168638	NOD1/2 Signaling Pathway	-0.3098	0.01033	0.32013
R-HSA-3000178	ECM proteoglycans	-0.3119	0.008018	0.319918
R-HSA-9690406	Transcriptional regulation of testis differentiation	-0.286137	0.03349	0.319627
R-HSA-202040	G-protein activation	-0.2825	0.03695	0.31945
R-HSA-5334118	DNA methylation	-0.2207	0.09863	0.31933
R-HSA-418890	Role of second messengers in netrin-1 signaling	-0.159875	0.1585	0.318375
R-HSA-112313	Neurotransmitter uptake and metabolism In glial cells	-0.118341	0.2	0.318341
R-HSA-210455	Astrocytic Glutamate-Glutamine Uptake And Metabolism	-0.118341	0.2	0.318341
R-HSA-446205	Synthesis of GDP-mannose	-0.346015	-0.02776	0.318255
R-HSA-9018679	Biosynthesis of EPA-derived SPMs	-0.132521	0.1856	0.318121
R-HSA-1250342	PI3K events in ERBB4 signaling	-0.169313	0.1481	0.317413
R-HSA-209560	NF-kB is activated and signals survival	-0.3335	-0.01667	0.31683
R-HSA-8939243	RUNX1 interacts with co-factors whose precise effect on RUNX1 targets is not known	-0.3648	-0.04821	0.31659
R-HSA-190375	FGFR2c ligand binding and activation	-0.2683	0.04798	0.31628
R-HSA-2122948	Activated NOTCH1 Transmits Signal to the Nucleus	-0.2715	0.04458	0.31608
R-HSA-9012852	Signaling by NOTCH3	-0.350591	-0.03479	0.315801
R-HSA-879415	Advanced glycosylation endproduct receptor signaling	-0.3129	0.002871	0.315771
R-HSA-437239	Recycling pathway of L1	-0.316785	-0.001063	0.315722
R-HSA-193368	Synthesis of bile acids and bile salts via 7alpha-hydroxycholesterol	-0.308	0.007667	0.315667
R-HSA-379397	Enzymatic degradation of dopamine by COMT	-0.135009	0.1804	0.315409
R-HSA-3928663	EPHA-mediated growth cone collapse	-0.248	0.06603	0.31403
R-HSA-1296071	Potassium Channels	-0.116167	0.1975	0.313667
R-HSA-9026766	Biosynthesis of protectin and resolvin conjugates in tissue regeneration (PCTR and RCTR)	-0.6429	-0.3295	0.3134
R-HSA-75944	Transcription from mitochondrial promoters	-0.3122	0.0007207	0.312921
R-HSA-2534343	Interaction With Cumulus Cells And The Zona Pellucida	-0.0622174	0.2506	0.312817
R-HSA-6804760	Regulation of TP53 Activity through Methylation	-0.2779	0.03476	0.31266
R-HSA-1253288	Downregulation of ERBB4 signaling	-0.3004	0.01123	0.31163
R-HSA-2187335	The retinoid cycle in cones (daylight vision)	-0.2384	0.07313	0.31153
R-HSA-209543	p75NTR recruits signalling complexes	-0.3058	0.005667	0.311467
R-HSA-2428933	SHC-related events triggered by IGF1R	-0.392324	-0.08145	0.310874
R-HSA-5576886	Phase 4 - resting membrane potential	-0.144942	0.1658	0.310742
R-HSA-193639	p75NTR signals via NF-kB	-0.3217	-0.01103	0.31067
R-HSA-9818030	NFE2L2 regulating tumorigenic genes	-0.363741	-0.05311	0.310631
R-HSA-1660516	Synthesis of PIPs at the early endosome membrane	-0.2825	0.02728	0.30978
R-HSA-192105	Synthesis of bile acids and bile salts	-0.252325	0.05725	0.309575
R-HSA-8866654	E3 ubiquitin ligases ubiquitinate target proteins	-0.2668	0.04249	0.30929
R-HSA-112126	ALKBH3 mediated reversal of alkylation damage	-0.3577	-0.04869	0.30901
R-HSA-416550	Sema4D mediated inhibition of cell attachment and migration	-0.33896	-0.03027	0.30869
R-HSA-445717	Aquaporin-mediated transport	-0.246726	0.06175	0.308476
R-HSA-499943	Interconversion of nucleotide di- and triphosphates	-0.388855	-0.08043	0.308425
R-HSA-622312	Inflammasomes	-0.3061	0.00226	0.30836
R-HSA-1482798	Acyl chain remodeling of CL	-0.0857525	0.2224	0.308152
R-HSA-180292	GAB1 signalosome	-0.324715	-0.01692	0.307795
R-HSA-881907	Gastrin-CREB signalling pathway via PKC and MAPK	-0.344293	-0.03696	0.307333
R-HSA-73884	Base Excision Repair	-0.2224	0.08448	0.30688
R-HSA-9634638	Estrogen-dependent nuclear events downstream of ESR-membrane signaling	-0.333131	-0.0267	0.306431
R-HSA-5620971	Pyroptosis	-0.3277	-0.02135	0.30635
R-HSA-5676934	Protein repair	-0.41265	-0.107	0.30565
R-HSA-9013407	RHOH GTPase cycle	-0.328926	-0.0233	0.305626
R-HSA-73943	Reversal of alkylation damage by DNA dioxygenases	-0.3734	-0.06787	0.30553
R-HSA-112411	MAPK1 (ERK2) activation	-0.3541	-0.04876	0.30534
R-HSA-68689	CDC6 association with the ORC:origin complex	0.07046	0.3753	0.30484
R-HSA-174403	Glutathione synthesis and recycling	0.01076	0.3153	0.30454
R-HSA-5358606	Mismatch repair (MMR) directed by MSH2:MSH3 (MutSbeta)	-0.1272	0.1772	0.3044
R-HSA-114608	Platelet degranulation	-0.303792	0.000536	0.304328
R-HSA-1679131	Trafficking and processing of endosomal TLR	-0.284272	0.01987	0.304142
R-HSA-167021	PLC-gamma1 signalling	-0.2034	0.1007	0.3041
R-HSA-2672351	Stimuli-sensing channels	-0.2787	0.02532	0.30402
R-HSA-936837	Ion transport by P-type ATPases	-0.207487	0.09642	0.303907
R-HSA-917937	Iron uptake and transport	-0.2305	0.07333	0.30383
R-HSA-8849474	PTK6 Activates STAT3	-0.324059	-0.02045	0.303609
R-HSA-5358565	Mismatch repair (MMR) directed by MSH2:MSH6 (MutSalpha)	-0.147	0.1566	0.3036
R-HSA-2142688	Synthesis of 5-eicosatetraenoic acids	-0.188465	0.1151	0.303565
R-HSA-399710	Activation of AMPA receptors	-0.5241	-0.2208	0.3033
R-HSA-9818028	NFE2L2 regulates pentose phosphate pathway genes	-0.322988	-0.0202	0.302788
R-HSA-2132295	MHC class II antigen presentation	-0.308	-0.005278	0.302722
R-HSA-399954	Sema3A PAK dependent Axon repulsion	-0.2788	0.02371	0.30251
R-HSA-379401	Dopamine clearance from the synaptic cleft	-0.130847	0.1715	0.302347
R-HSA-2514853	Condensation of Prometaphase Chromosomes	-0.338305	-0.0362	0.302105
R-HSA-9668328	Sealing of the nuclear envelope (NE) by ESCRT-III	-0.290109	0.01155	0.301659
R-HSA-9648002	RAS processing	-0.2878	0.01349	0.30129
R-HSA-844456	The NLRP3 inflammasome	-0.302	-0.0007611	0.301239
R-HSA-9725554	Differentiation of Keratinocytes in Interfollicular Epidermis in Mammalian Skin	-0.237318	0.06371	0.301028
R-HSA-444411	Rhesus glycoproteins mediate ammonium transport	-0.202173	0.0985511	0.300724
R-HSA-3238698	WNT ligand biogenesis and trafficking	-0.1304	0.1702	0.3006
R-HSA-159418	Recycling of bile acids and salts	-0.3544	-0.0542	0.3002
R-HSA-166663	Initial triggering of complement	-0.2919	0.008205	0.300105
R-HSA-389957	Prefoldin mediated transfer of substrate to CCT/TriC	-0.338316	-0.03868	0.299636
R-HSA-426486	Small interfering RNA (siRNA) biogenesis	-0.2459	0.05373	0.29963
R-HSA-217271	FMO oxidises nucleophiles	-0.138666	0.1607	0.299366
R-HSA-77289	Mitochondrial Fatty Acid Beta-Oxidation	-0.2521	0.04723	0.29933
R-HSA-5358508	Mismatch Repair	-0.1371	0.1621	0.2992
R-HSA-2162123	Synthesis of Prostaglandins (PG) and Thromboxanes (TX)	-0.2296	0.06871	0.29831
R-HSA-8863795	Downregulation of ERBB2 signaling	-0.3088	-0.01164	0.29716
R-HSA-9662361	Sensory processing of sound by outer hair cells of the cochlea	-0.239672	0.05705	0.296722
R-HSA-9818035	NFE2L2 regulating ER-stress associated genes	-0.282472	0.01414	0.296612
R-HSA-388844	Receptor-type tyrosine-protein phosphatases	-0.31323	-0.01664	0.29659
R-HSA-9026290	Biosynthesis of DPAn-3-derived maresins	-0.122822	0.1737	0.296522
R-HSA-1442490	Collagen degradation	-0.272697	0.0235	0.296197
R-HSA-9007892	Interleukin-38 signaling	-0.09403	0.2018	0.29583
R-HSA-2142700	Biosynthesis of Lipoxins (LX)	-0.178337	0.1173	0.295637
R-HSA-389356	Co-stimulation by CD28	-0.2756	0.01947	0.29507
R-HSA-444257	RSK activation	-0.3498	-0.05479	0.29501
R-HSA-111471	Apoptotic factor-mediated response	-0.2461	0.04884	0.29494
R-HSA-9013422	RHOBTB1 GTPase cycle	-0.354012	-0.05947	0.294542
R-HSA-5368286	Mitochondrial translation initiation	-0.438	-0.1444	0.2936
R-HSA-5656169	Termination of translesion DNA synthesis	-0.2508	0.04265	0.29345
R-HSA-804914	Transport of fatty acids	-0.243187	0.05015	0.293337
R-HSA-110320	Translesion Synthesis by POLH	-0.2346	0.05866	0.29326
R-HSA-8851805	MET activates RAS signaling	-0.289477	0.003554	0.293031
R-HSA-5652084	Fructose metabolism	-0.1707	0.1222	0.2929
R-HSA-5626467	RHO GTPases activate IQGAPs	-0.267884	0.02493	0.292814
R-HSA-8963889	Assembly of active LPL and LIPC lipase complexes	-0.25186	0.04033	0.29219
R-HSA-354194	GRB2:SOS provides linkage to MAPK signaling for Integrins	-0.3807	-0.08925	0.29145
R-HSA-2408508	Metabolism of ingested SeMet, Sec, MeSec into H2Se	-0.329628	-0.0382	0.291428
R-HSA-2173789	TGF-beta receptor signaling activates SMADs	-0.2861	0.005099	0.291199
R-HSA-389958	Cooperation of Prefoldin and TriC/CCT in actin and tubulin folding	-0.333687	-0.04259	0.291097
R-HSA-2022090	Assembly of collagen fibrils and other multimeric structures	-0.234144	0.05693	0.291074
R-HSA-73942	DNA Damage Reversal	-0.4065	-0.1155	0.291
R-HSA-72187	mRNA 3'-end processing	-0.4076	-0.1167	0.2909
R-HSA-5690714	CD22 mediated BCR regulation	-0.3539	-0.06319	0.29071
R-HSA-420597	Nectin/Necl trans heterodimerization	-0.12827	0.1624	0.29067
R-HSA-166208	mTORC1-mediated signalling	-0.2454	0.04517	0.29057
R-HSA-444821	Relaxin receptors	0.2453	0.5358	0.2905
R-HSA-70895	Branched-chain amino acid catabolism	-0.3201	-0.03009	0.29001
R-HSA-1237112	Methionine salvage pathway	-0.3088	-0.01947	0.28933
R-HSA-8963684	Tyrosine catabolism	-0.0808	0.2077	0.2885
R-HSA-190840	Microtubule-dependent trafficking of connexons from Golgi to the plasma membrane	-0.2601	0.02738	0.28748
R-HSA-8875791	MET activates STAT3	-0.3041	-0.01681	0.28729
R-HSA-2173782	Binding and Uptake of Ligands by Scavenger Receptors	-0.2229	0.06436	0.28726
R-HSA-450321	JNK (c-Jun kinases) phosphorylation and activation mediated by activated human TAK1	-0.3079	-0.02078	0.28712
R-HSA-9013148	CDC42 GTPase cycle	-0.277195	0.009631	0.286826
R-HSA-9026357	NTF4 activates NTRK2 (TRKB) signaling	-0.4426	-0.1558	0.2868
R-HSA-1475029	Reversible hydration of carbon dioxide	0.05124	0.338	0.28676
R-HSA-211736	Stimulation of the cell death response by PAK-2p34	-0.333116	-0.04646	0.286656
R-HSA-416482	G alpha (12/13) signalling events	-0.296177	-0.01	0.286177
R-HSA-9734767	Developmental Cell Lineages	-0.182778	0.103	0.285778
R-HSA-9755088	Ribavirin ADME	-0.279076	0.006659	0.285735
R-HSA-450520	HuR (ELAVL1) binds and stabilizes mRNA	-0.3323	-0.04664	0.28566
R-HSA-1474228	Degradation of the extracellular matrix	-0.2233	0.06231	0.28561
R-HSA-8869496	TFAP2A acts as a transcriptional repressor during retinoic acid induced cell differentiation	-0.2224	0.06149	0.28389
R-HSA-5218920	VEGFR2 mediated vascular permeability	-0.2828	0.0002276	0.283028
R-HSA-9707587	Regulation of HMOX1 expression and activity	-0.306783	-0.02425	0.282533
R-HSA-9818027	NFE2L2 regulating anti-oxidant/detoxification enzymes	-0.257021	0.02543	0.282451
R-HSA-446343	Localization of the PINCH-ILK-PARVIN complex to focal adhesions	-0.407486	-0.1251	0.282386
R-HSA-9821002	Chromatin modifications during the maternal to zygotic transition (MZT)	-0.2207	0.06152	0.28222
R-HSA-983712	Ion channel transport	-0.2411	0.04109	0.28219
R-HSA-9014826	Interleukin-36 pathway	-0.06762	0.214262	0.281882
R-HSA-70370	Galactose catabolism	-0.45805	-0.1766	0.28145
R-HSA-69166	Removal of the Flap Intermediate	-0.08678	0.1945	0.28128
R-HSA-9645135	STAT5 Activation	-0.1663	0.1147	0.281
R-HSA-5250924	B-WICH complex positively regulates rRNA expression	-0.2703	0.01048	0.28078
R-HSA-451326	Activation of kainate receptors upon glutamate binding	-0.1443	0.1363	0.2806
R-HSA-189085	Digestion of dietary carbohydrate	-0.3969	-0.1166	0.2803
R-HSA-110381	Resolution of AP sites via the single-nucleotide replacement pathway	-0.1434	0.1368	0.2802
R-HSA-8985586	SLIT2:ROBO1 increases RHOA activity	-0.366832	-0.08665	0.280182
R-HSA-196108	Pregnenolone biosynthesis	-0.350878	-0.0707	0.280178
R-HSA-9617629	Regulation of FOXO transcriptional activity by acetylation	-0.245921	0.03332	0.279241
R-HSA-373755	Semaphorin interactions	-0.249705	0.02936	0.279065
R-HSA-912631	Regulation of signaling by CBL	-0.2466	0.03246	0.27906
R-HSA-5607761	Dectin-1 mediated noncanonical NF-kB signaling	-0.2513	0.0275	0.2788
R-HSA-202427	Phosphorylation of CD3 and TCR zeta chains	-0.335	-0.05633	0.27867
R-HSA-211728	Regulation of PAK-2p34 activity by PS-GAP/RHG10	-0.315913	-0.03748	0.278433
R-HSA-9027284	Erythropoietin activates RAS	-0.3261	-0.04769	0.27841
R-HSA-166187	Mitochondrial Uncoupling	0.0123696	0.2903	0.27793
R-HSA-9013404	RAC2 GTPase cycle	-0.275399	0.002335	0.277734
R-HSA-391906	Leukotriene receptors	0.3411	0.6188	0.2777
R-HSA-388841	Regulation of T cell activation by CD28 family	-0.2556	0.02161	0.27721
R-HSA-5607763	CLEC7A (Dectin-1) induces NFAT activation	-0.3441	-0.0672155	0.276884
R-HSA-113418	Formation of the Early Elongation Complex	-0.3616	-0.08522	0.27638
R-HSA-399956	CRMPs in Sema3A signaling	-0.2506	0.02572	0.27632
R-HSA-2559585	Oncogene Induced Senescence	-0.3163	-0.04038	0.27592
R-HSA-211999	CYP2E1 reactions	0.2096	0.4853	0.2757
R-HSA-71384	Ethanol oxidation	0.1049	0.379308	0.274408
R-HSA-5140745	WNT5A-dependent internalization of FZD2, FZD5 and ROR2	-0.2789	-0.004862	0.274038
R-HSA-983695	Antigen activates B Cell Receptor (BCR) leading to generation of second messengers	-0.2233	0.05067	0.27397
R-HSA-110313	Translesion synthesis by Y family DNA polymerases bypasses lesions on DNA template	-0.2648	0.009109	0.273909
R-HSA-2408552	Methylation of MeSeH for excretion	-0.0221	0.2518	0.2739
R-HSA-446353	Cell-extracellular matrix interactions	-0.282024	-0.008523	0.273501
R-HSA-9013418	RHOBTB2 GTPase cycle	-0.3082	-0.0351	0.2731
R-HSA-450302	activated TAK1 mediates p38 MAPK activation	-0.3077	-0.03462	0.27308
R-HSA-194068	Bile acid and bile salt metabolism	-0.2754	-0.002366	0.273034
R-HSA-111933	Calmodulin induced events	-0.285331	-0.0123	0.273031
R-HSA-111997	CaM pathway	-0.285331	-0.0123	0.273031
R-HSA-5620924	Intraflagellar transport	-0.2801	-0.007072	0.273028
R-HSA-8866427	VLDLR internalisation and degradation	-0.2877	-0.01497	0.27273
R-HSA-6803529	FGFR2 alternative splicing	-0.3661	-0.09351	0.27259
R-HSA-190373	FGFR1c ligand binding and activation	-0.3694	-0.09688	0.27252
R-HSA-190828	Gap junction trafficking	-0.268037	0.004066	0.272103
R-HSA-2151201	Transcriptional activation of mitochondrial biogenesis	-0.257786	0.01408	0.271866
R-HSA-9014325	TICAM1,TRAF6-dependent induction of TAK1 complex	-0.2842	-0.01237	0.27183
R-HSA-193807	Synthesis of bile acids and bile salts via 27-hydroxycholesterol	-0.3258	-0.0544	0.2714
R-HSA-73817	Purine ribonucleoside monophosphate biosynthesis	-0.2086	0.06218	0.27078
R-HSA-937039	IRAK1 recruits IKK complex	-0.3112	-0.04042	0.27078
R-HSA-975144	IRAK1 recruits IKK complex upon TLR7/8 or 9 stimulation	-0.3112	-0.04042	0.27078
R-HSA-5423646	Aflatoxin activation and detoxification	-0.009174	0.2615	0.270674
R-HSA-5658442	Regulation of RAS by GAPs	-0.2624	0.008093	0.270493
R-HSA-69183	Processive synthesis on the lagging strand	-0.07746	0.193	0.27046
R-HSA-5696397	Gap-filling DNA repair synthesis and ligation in GG-NER	-0.2048	0.06517	0.26997
R-HSA-1433559	Regulation of KIT signaling	-0.304778	-0.03523	0.269548
R-HSA-5689901	Metalloprotease DUBs	-0.2793	-0.009957	0.269343
R-HSA-110314	Recognition of DNA damage by PCNA-containing replication complex	-0.2162	0.05303	0.26923
R-HSA-73893	DNA Damage Bypass	-0.2577	0.01153	0.26923
R-HSA-5368287	Mitochondrial translation	-0.4031	-0.1339	0.2692
R-HSA-937072	TRAF6-mediated induction of TAK1 complex within TLR4 complex	-0.2864	-0.01733	0.26907
R-HSA-975163	IRAK2 mediated activation of TAK1 complex upon TLR7/8 or 9 stimulation	-0.2864	-0.01733	0.26907
R-HSA-1592230	Mitochondrial biogenesis	-0.244856	0.02369	0.268546
R-HSA-9013423	RAC3 GTPase cycle	-0.261964	0.006572	0.268536
R-HSA-9793528	Ciprofloxacin ADME	0.05123	0.319522	0.268292
R-HSA-9860927	Turbulent (oscillatory, disturbed) flow shear stress activates signaling by PIEZO1 and integrins in endothelial cells	-0.3166	-0.04832	0.26828
R-HSA-9645460	Alpha-protein kinase 1 signaling pathway	-0.2847	-0.01655	0.26815
R-HSA-5676590	NIK-->noncanonical NF-kB signaling	-0.2355	0.03261	0.26811
R-HSA-72086	mRNA Capping	-0.3816	-0.1135	0.2681
R-HSA-77387	Insulin receptor recycling	-0.256818	0.0112	0.268018
R-HSA-77111	Synthesis of Ketone Bodies	-0.4711	-0.2031	0.268
R-HSA-157858	Gap junction trafficking and regulation	-0.278449	-0.01045	0.267999
R-HSA-937042	IRAK2 mediated activation of TAK1 complex	-0.2924	-0.0249	0.2675
R-HSA-9816359	Maternal to zygotic transition (MZT)	-0.276	-0.008554	0.267446
R-HSA-8948216	Collagen chain trimerization	-0.205154	0.06215	0.267304
R-HSA-6799198	Complex I biogenesis	-0.2338	0.03331	0.26711
R-HSA-9748787	Azathioprine ADME	-0.326	-0.05898	0.26702
R-HSA-9012546	Interleukin-18 signaling	-0.0544	0.2124	0.2668
R-HSA-196025	Formation of annular gap junctions	-0.26301	0.003043	0.266053
R-HSA-69091	Polymerase switching	-0.1444	0.1215	0.2659
R-HSA-69109	Leading Strand Synthesis	-0.1444	0.1215	0.2659
R-HSA-2022870	Chondroitin sulfate biosynthesis	-0.286748	-0.02123	0.265518
R-HSA-193648	NRAGE signals death through JNK	-0.2671	-0.00159	0.26551
R-HSA-6785470	tRNA processing in the mitochondrion	-0.460904	-0.1957	0.265204
R-HSA-8979227	Triglyceride metabolism	-0.2909	-0.0258	0.2651
R-HSA-391908	Prostanoid ligand receptors	0.007277	0.2714	0.264123
R-HSA-111367	SLBP independent Processing of Histone Pre-mRNAs	-0.436821	-0.1727	0.264121
R-HSA-9909505	Modulation of host responses by IFN-stimulated genes	-0.2948	-0.03079	0.26401
R-HSA-9856530	High laminar flow shear stress activates signaling by PIEZO1 and PECAM1:CDH5:KDR in endothelial cells	-0.268132	-0.004192	0.26394
R-HSA-373753	Nephrin family interactions	-0.169169	0.09475	0.263919
R-HSA-111459	Activation of caspases through apoptosome-mediated cleavage	-0.2937	-0.02986	0.26384
R-HSA-9020265	Biosynthesis of aspirin-triggered D-series resolvins	-0.0903031	0.1734	0.263703
R-HSA-8875555	MET activates RAP1 and RAC1	-0.237541	0.02433	0.261871
R-HSA-9018678	Biosynthesis of specialized proresolving mediators (SPMs)	-0.279718	-0.01786	0.261858
R-HSA-2025928	Calcineurin activates NFAT	-0.3561	-0.09515	0.26095
R-HSA-15869	Metabolism of nucleotides	-0.314479	-0.05355	0.260929
R-HSA-8939245	RUNX1 regulates transcription of genes involved in BCR signaling	-0.2262	0.03451	0.26071
R-HSA-9607240	FLT3 Signaling	-0.2351	0.02519	0.26029
R-HSA-1489509	DAG and IP3 signaling	-0.258687	0.001491	0.260178
R-HSA-9032500	Activated NTRK2 signals through FYN	-0.3257	-0.06553	0.26017
R-HSA-9706019	RHOBTB3 ATPase cycle	-0.253664	0.006442	0.260106
R-HSA-8849471	PTK6 Regulates RHO GTPases, RAS GTPase and MAP kinases	-0.294043	-0.03432	0.259723
R-HSA-8849932	Synaptic adhesion-like molecules	-0.1665	0.09313	0.25963
R-HSA-418457	cGMP effects	0.118	0.3774	0.2594
R-HSA-182971	EGFR downregulation	-0.2524	0.006818	0.259218
R-HSA-71336	Pentose phosphate pathway	-0.167717	0.09135	0.259068
R-HSA-9029569	NR1H3 & NR1H2 regulate gene expression linked to cholesterol transport and efflux	-0.282884	-0.02385	0.259034
R-HSA-5362517	Signaling by Retinoic Acid	-0.326329	-0.06771	0.25862
R-HSA-9839373	Signaling by TGFBR3	-0.295925	-0.03768	0.258245
R-HSA-9748784	Drug ADME	-0.224444	0.0338	0.258244
R-HSA-111996	Ca-dependent events	-0.306574	-0.04845	0.258124
R-HSA-9705462	Inactivation of CSF3 (G-CSF) signaling	-0.308	-0.04997	0.25803
R-HSA-1638074	Keratan sulfate/keratin metabolism	-0.153599	0.1044	0.257999
R-HSA-5205647	Mitophagy	-0.2753	-0.01749	0.25781
R-HSA-71032	Propionyl-CoA catabolism	-0.35957	-0.1018	0.25777
R-HSA-68881	Mitotic Metaphase/Anaphase Transition	-0.1298	0.1279	0.2577
R-HSA-5205685	PINK1-PRKN Mediated Mitophagy	-0.2641	-0.006438	0.257662
R-HSA-9861559	PDH complex synthesizes acetyl-CoA from PYR	-0.152	0.105601	0.257601
R-HSA-5365859	RA biosynthesis pathway	-0.1887	0.06767	0.25637
R-HSA-5684264	MAP3K8 (TPL2)-dependent MAPK1/3 activation	-0.261	-0.004764	0.256236
R-HSA-6804754	Regulation of TP53 Expression	-0.3547	-0.09887	0.25583
R-HSA-9013149	RAC1 GTPase cycle	-0.244681	0.0106	0.255281
R-HSA-2473224	Antagonism of Activin by Follistatin	0.201552	0.456758	0.255205
R-HSA-9609523	Insertion of tail-anchored proteins into the endoplasmic reticulum membrane	-0.306822	-0.05188	0.254942
R-HSA-9819196	Zygotic genome activation (ZGA)	-0.267775	-0.0129	0.254875
R-HSA-9706574	RHOBTB GTPase Cycle	-0.3013	-0.04657	0.25473
R-HSA-5389840	Mitochondrial translation elongation	-0.4206	-0.166	0.2546
R-HSA-977068	Termination of O-glycan biosynthesis	-0.2874	-0.03329	0.25411
R-HSA-5357956	TNFR1-induced NF-kappa-B signaling pathway	-0.1861	0.06786	0.25396
R-HSA-9018676	Biosynthesis of D-series resolvins	-0.0897491	0.1642	0.253949
R-HSA-352230	Amino acid transport across the plasma membrane	-0.1717	0.08224	0.25394
R-HSA-4085001	Sialic acid metabolism	-0.226428	0.02741	0.253838
R-HSA-163560	Triglyceride catabolism	-0.2984	-0.04549	0.25291
R-HSA-9013409	RHOJ GTPase cycle	-0.289052	-0.03646	0.252592
R-HSA-456926	Thrombin signalling through proteinase activated receptors (PARs)	-0.302094	-0.04953	0.252564
R-HSA-2586552	Signaling by Leptin	-0.235	0.01731	0.25231
R-HSA-157579	Telomere Maintenance	-0.2314	0.02077	0.25217
R-HSA-1236977	Endosomal/Vacuolar pathway	-0.165328	0.08675	0.252078
R-HSA-8948747	Regulation of PTEN localization	-0.2525	-0.0004383	0.252062
R-HSA-372708	p130Cas linkage to MAPK signaling for integrins	-0.3054	-0.05343	0.25197
R-HSA-450341	Activation of the AP-1 family of transcription factors	-0.3052	-0.05346	0.25174
R-HSA-9025046	NTF3 activates NTRK2 (TRKB) signaling	0.1041	0.3554	0.2513
R-HSA-9927353	Co-inhibition by BTLA	-0.162842	0.08845	0.251292
R-HSA-6803204	TP53 Regulates Transcription of Genes Involved in Cytochrome C Release	-0.273901	-0.02282	0.251081
R-HSA-2173791	TGF-beta receptor signaling in EMT (epithelial to mesenchymal transition)	-0.2268	0.02427	0.25107
R-HSA-532668	N-glycan trimming in the ER and Calnexin/Calreticulin cycle	-0.3321	-0.0813	0.2508
R-HSA-447041	CHL1 interactions	-0.1628	0.08754	0.25034
R-HSA-3000170	Syndecan interactions	-0.2614	-0.01108	0.25032
R-HSA-1474151	Tetrahydrobiopterin (BH4) synthesis, recycling, salvage and regulation	-0.2799	-0.02962	0.25028
R-HSA-112409	RAF-independent MAPK1/3 activation	-0.276697	-0.02648	0.250217
R-HSA-434313	Intracellular metabolism of fatty acids regulates insulin secretion	-0.468131	-0.2181	0.250031
R-HSA-174417	Telomere C-strand (Lagging Strand) Synthesis	-0.2077	0.04178	0.24948
R-HSA-139853	Elevation of cytosolic Ca2+ levels	-0.01674	0.2327	0.24944
R-HSA-75067	Processing of Capped Intronless Pre-mRNA	-0.4089	-0.1598	0.2491
R-HSA-2161522	Abacavir ADME	0.0268966	0.2758	0.248903
R-HSA-8941858	Regulation of RUNX3 expression and activity	-0.2498	-0.0009069	0.248893
R-HSA-140875	Common Pathway of Fibrin Clot Formation	-0.309402	-0.06056	0.248842
R-HSA-9008059	Interleukin-37 signaling	-0.3019	-0.05344	0.24846
R-HSA-933542	TRAF6 mediated NF-kB activation	-0.3046	-0.05617	0.24843
R-HSA-8852135	Protein ubiquitination	-0.2433	0.005122	0.248422
R-HSA-9843970	Regulation of endogenous retroelements by the Human Silencing Hub (HUSH) complex	-0.218	0.03041	0.24841
R-HSA-982772	Growth hormone receptor signaling	-0.328128	-0.07991	0.248218
R-HSA-5362798	Release of Hh-Np from the secreting cell	-0.05307	0.1949	0.24797
R-HSA-193048	Androgen biosynthesis	-0.04904	0.1988	0.24784
R-HSA-110312	Translesion synthesis by REV1	-0.2209	0.02688	0.24778
R-HSA-5655862	Translesion synthesis by POLK	-0.2207	0.02701	0.24771
R-HSA-9824585	Regulation of MITF-M-dependent genes involved in pigmentation	-0.277115	-0.02945	0.247665
R-HSA-180786	Extension of Telomeres	-0.2122	0.03517	0.24737
R-HSA-9758890	Transport of RCbl within the body	-0.2215	0.02578	0.24728
R-HSA-5656121	Translesion synthesis by POLI	-0.2199	0.02726	0.24716
R-HSA-9018681	Biosynthesis of protectins	-0.5398	-0.2928	0.247
R-HSA-1483226	Synthesis of PI	-0.129744	0.1172	0.246944
R-HSA-901042	Calnexin/calreticulin cycle	-0.3216	-0.07479	0.24681
R-HSA-2468052	Establishment of Sister Chromatid Cohesion	-0.176	0.07073	0.24673
R-HSA-77588	SLBP Dependent Processing of Replication-Dependent Histone Pre-mRNAs	-0.43244	-0.1862	0.24624
R-HSA-6803211	TP53 Regulates Transcription of Death Receptors and Ligands	-0.3095	-0.06336	0.24614
R-HSA-112040	G-protein mediated events	-0.293364	-0.04746	0.245904
R-HSA-3214858	RMTs methylate histone arginines	-0.2522	-0.006332	0.245868
R-HSA-5624138	Trafficking of myristoylated proteins to the cilium	-0.312374	-0.06675	0.245624
R-HSA-73856	RNA Polymerase II Transcription Termination	-0.4	-0.1545	0.2455
R-HSA-9839394	TGFBR3 expression	-0.3059	-0.06059	0.24531
R-HSA-190873	Gap junction degradation	-0.252861	-0.007584	0.245277
R-HSA-3928664	Ephrin signaling	-0.221012	0.02402	0.245032
R-HSA-204174	Regulation of pyruvate dehydrogenase (PDH) complex	-0.2718	-0.02715	0.24465
R-HSA-3000484	Scavenging by Class F Receptors	-0.244	0.0003522	0.244352
R-HSA-2173788	Downregulation of TGF-beta receptor signaling	-0.281	-0.03682	0.24418
R-HSA-112043	PLC beta mediated events	-0.295061	-0.05138	0.243681
R-HSA-9913351	Formation of the dystrophin-glycoprotein complex (DGC)	-0.214454	0.0289	0.243354
R-HSA-70350	Fructose catabolism	-0.1114	0.1319	0.2433
R-HSA-73728	RNA Polymerase I Promoter Opening	-0.1864	0.05676	0.24316
R-HSA-1483206	Glycerophospholipid biosynthesis	-0.236131	0.006847	0.242978
R-HSA-2172127	DAP12 interactions	-0.24361	-0.001223	0.242387
R-HSA-9031528	NR1H2 & NR1H3 regulate gene expression linked to triglyceride lipolysis in adipose	-0.417711	-0.1756	0.242111
R-HSA-9926550	Regulation of MITF-M-dependent genes involved in extracellular matrix, focal adhesion and epithelial-to-mesenchymal transition	-0.35309	-0.1117	0.24139
R-HSA-1300642	Sperm Motility And Taxes	0.3501	0.5913	0.2412
R-HSA-3301854	Nuclear Pore Complex (NPC) Disassembly	-0.2306	0.0106	0.2412
R-HSA-9818032	NFE2L2 regulating MDR associated enzymes	-0.317059	-0.0763	0.240759
R-HSA-189483	Heme degradation	-0.357947	-0.1172	0.240747
R-HSA-140877	Formation of Fibrin Clot (Clotting Cascade)	-0.2164	0.0241	0.2405
R-HSA-74259	Purine catabolism	-0.254879	-0.01449	0.240389
R-HSA-9018677	Biosynthesis of DHA-derived SPMs	-0.279851	-0.03954	0.240311
R-HSA-9033241	Peroxisomal protein import	-0.267	-0.02694	0.24006
R-HSA-9837092	FASTK family proteins regulate processing and stability of mitochondrial RNAs	-0.203724	0.03629	0.240013
R-HSA-975577	N-Glycan antennae elongation	-0.2816	-0.04184	0.23976
R-HSA-9634635	Estrogen-stimulated signaling through PRKCZ	-0.3749	-0.1352	0.2397
R-HSA-6806667	Metabolism of fat-soluble vitamins	-0.1717	0.06772	0.23942
R-HSA-9603381	Activated NTRK3 signals through PI3K	-0.2626	-0.02327	0.23933
R-HSA-9013405	RHOD GTPase cycle	-0.2487	-0.009752	0.238948
R-HSA-3000171	Non-integrin membrane-ECM interactions	-0.232831	0.00557	0.238401
R-HSA-5576893	Phase 2 - plateau phase	-0.2017	0.0365622	0.238262
R-HSA-191859	snRNP Assembly	-0.3254	-0.08723	0.23817
R-HSA-194441	Metabolism of non-coding RNA	-0.3254	-0.08723	0.23817
R-HSA-5578749	Transcriptional regulation by small RNAs	-0.2339	0.003729	0.237629
R-HSA-445095	Interaction between L1 and Ankyrins	-0.122718	0.1149	0.237618
R-HSA-2470946	Cohesin Loading onto Chromatin	-0.1887	0.04826	0.23696
R-HSA-8939236	RUNX1 regulates transcription of genes involved in differentiation of HSCs	-0.2215	0.01541	0.23691
R-HSA-6805567	Keratinization	-0.231487	0.005384	0.236871
R-HSA-1296053	Classical Kir channels	0.187475	0.424	0.236525
R-HSA-9028335	Activated NTRK2 signals through PI3K	-0.177375	0.05907	0.236445
R-HSA-189200	Cellular hexose transport	0.0114651	0.2471	0.235635
R-HSA-937041	IKK complex recruitment mediated by RIP1	-0.2724	-0.03677	0.23563
R-HSA-9010642	ROBO receptors bind AKAP5	-0.325153	-0.08956	0.235593
R-HSA-8873719	RAB geranylgeranylation	-0.229742	0.005663	0.235405
R-HSA-9020956	Interleukin-27 signaling	-0.3414	-0.1062	0.2352
R-HSA-71387	Metabolism of carbohydrates	-0.2218	0.01331	0.23511
R-HSA-1369062	ABC transporters in lipid homeostasis	-0.091242	0.1438	0.235042
R-HSA-975576	N-glycan antennae elongation in the medial/trans-Golgi	-0.212583	0.02215	0.234733
R-HSA-190322	FGFR4 ligand binding and activation	-0.001754	0.2329	0.234654
R-HSA-6806834	Signaling by MET	-0.2021	0.03253	0.23463
R-HSA-8851907	MET activates PI3K/AKT signaling	-0.17923	0.0554	0.23463
R-HSA-5419276	Mitochondrial translation termination	-0.4377	-0.2032	0.2345
R-HSA-3134975	Regulation of innate immune responses to cytosolic DNA	-0.294	-0.0603	0.2337
R-HSA-6804759	Regulation of TP53 Activity through Association with Co-factors	-0.317787	-0.08484	0.232947
R-HSA-3232118	SUMOylation of transcription factors	-0.2358	-0.003074	0.232726
R-HSA-2029482	Regulation of actin dynamics for phagocytic cup formation	-0.2155	0.01709	0.23259
R-HSA-210990	PECAM1 interactions	-0.219887	0.01255	0.232437
R-HSA-418990	Adherens junctions interactions	-0.1913	0.04107	0.23237
R-HSA-165159	MTOR signalling	-0.2406	-0.00852	0.23208
R-HSA-9648895	Response of EIF2AK1 (HRI) to heme deficiency	-0.1848	0.04728	0.23208
R-HSA-264870	Caspase-mediated cleavage of cytoskeletal proteins	-0.2242	0.007729	0.231929
R-HSA-400451	Free fatty acids regulate insulin secretion	-0.4059	-0.1741	0.2318
R-HSA-72165	mRNA Splicing - Minor Pathway	-0.4076	-0.1759	0.2317
R-HSA-9680350	Signaling by CSF1 (M-CSF) in myeloid cells	-0.2186	0.01296	0.23156
R-HSA-8978934	Metabolism of cofactors	-0.2905	-0.059	0.2315
R-HSA-450408	AUF1 (hnRNP D0) binds and destabilizes mRNA	-0.2521	-0.02088	0.23122
R-HSA-6791312	TP53 Regulates Transcription of Cell Cycle Genes	-0.2537	-0.0225	0.2312
R-HSA-606279	Deposition of new CENPA-containing nucleosomes at the centromere	-0.1932	0.03786	0.23106
R-HSA-774815	Nucleosome assembly	-0.1932	0.03786	0.23106
R-HSA-190861	Gap junction assembly	-0.239	-0.008064	0.230936
R-HSA-2559584	Formation of Senescence-Associated Heterochromatin Foci (SAHF)	-0.2883	-0.05747	0.23083
R-HSA-4086398	Ca2+ pathway	-0.2714	-0.04077	0.23063
R-HSA-190242	FGFR1 ligand binding and activation	-0.4126	-0.182	0.2306
R-HSA-168927	TICAM1, RIP1-mediated IKK complex recruitment	-0.2712	-0.04102	0.23018
R-HSA-391160	Signal regulatory protein family interactions	-0.2323	-0.002458	0.229842
R-HSA-9732724	IFNG signaling activates MAPKs	-0.43086	-0.2012	0.22966
R-HSA-445355	Smooth Muscle Contraction	-0.27	-0.04045	0.22955
R-HSA-5099900	WNT5A-dependent internalization of FZD4	-0.2856	-0.05605	0.22955
R-HSA-975110	TRAF6 mediated IRF7 activation in TLR7/8 or 9 signaling	-0.2728	-0.04344	0.22936
R-HSA-1660661	Sphingolipid de novo biosynthesis	-0.07813	0.1512	0.22933
R-HSA-8951671	RUNX3 regulates YAP1-mediated transcription	-0.119218	0.1099	0.229118
R-HSA-5218921	VEGFR2 mediated cell proliferation	-0.2688	-0.0398	0.229
R-HSA-9674555	Signaling by CSF3 (G-CSF)	-0.2511	-0.02234	0.22876
R-HSA-111995	phospho-PLA2 pathway	-0.444588	-0.2161	0.228488
R-HSA-5250913	Positive epigenetic regulation of rRNA expression	-0.2478	-0.01939	0.22841
R-HSA-2424491	DAP12 signaling	-0.225321	0.00291	0.228231
R-HSA-9696264	RND3 GTPase cycle	-0.183822	0.04412	0.227942
R-HSA-975634	Retinoid metabolism and transport	-0.1776	0.05027	0.22787
R-HSA-8984722	Interleukin-35 Signalling	-0.3349	-0.1081	0.2268
R-HSA-9614657	FOXO-mediated transcription of cell death genes	-0.255726	-0.02915	0.226576
R-HSA-76009	Platelet Aggregation (Plug Formation)	-0.2982	-0.07185	0.22635
R-HSA-196807	Nicotinate metabolism	-0.142	0.08397	0.22597
R-HSA-167044	Signalling to RAS	-0.2905	-0.06461	0.22589
R-HSA-8943724	Regulation of PTEN gene transcription	-0.2784	-0.05253	0.22587
R-HSA-391903	Eicosanoid ligand-binding receptors	0.01937	0.2449	0.22553
R-HSA-199992	trans-Golgi Network Vesicle Budding	-0.241968	-0.01675	0.225218
R-HSA-432720	Lysosome Vesicle Biogenesis	-0.248477	-0.02346	0.225017
R-HSA-8874177	ATF6B (ATF6-beta) activates chaperones	-0.233	-0.008027	0.224973
R-HSA-2197563	NOTCH2 intracellular domain regulates transcription	-0.24576	-0.02116	0.2246
R-HSA-1169408	ISG15 antiviral mechanism	-0.261	-0.0365	0.2245
R-HSA-9696273	RND1 GTPase cycle	-0.138834	0.08546	0.224294
R-HSA-9818026	NFE2L2 regulating inflammation associated genes	-0.308245	-0.084	0.224245
R-HSA-9696270	RND2 GTPase cycle	-0.126923	0.09701	0.223933
R-HSA-177929	Signaling by EGFR	-0.2315	-0.007693	0.223807
R-HSA-1368071	NR1D1 (REV-ERBA) represses gene expression	-0.425438	-0.2018	0.223638
R-HSA-390466	Chaperonin-mediated protein folding	-0.289892	-0.06706	0.222832
R-HSA-68616	Assembly of the ORC complex at the origin of replication	-0.1851	0.0377	0.2228
R-HSA-6814122	Cooperation of PDCL (PhLP1) and TRiC/CCT in G-protein beta folding	-0.3566	-0.1339	0.2227
R-HSA-156587	Amino Acid conjugation	0.464454	0.6871	0.222646
R-HSA-159424	Conjugation of carboxylic acids	0.464454	0.6871	0.222646
R-HSA-177135	Conjugation of benzoate with glycine	0.464454	0.6871	0.222646
R-HSA-1059683	Interleukin-6 signaling	-0.2677	-0.04509	0.22261
R-HSA-70221	Glycogen breakdown (glycogenolysis)	-0.0078524	0.2144	0.222252
R-HSA-156588	Glucuronidation	-0.233497	-0.01135	0.222147
R-HSA-9856532	Mechanical load activates signaling by PIEZO1 and integrins in osteocytes	-0.27198	-0.04991	0.22207
R-HSA-9818749	Regulation of NFE2L2 gene expression	-0.3637	-0.1422	0.2215
R-HSA-9758881	Uptake of dietary cobalamins into enterocytes	0.3585	0.5799	0.2214
R-HSA-727802	Transport of nucleotide sugars	-0.262389	-0.04101	0.221379
R-HSA-442660	Na+/Cl- dependent neurotransmitter transporters	-0.02779	0.1932	0.22099
R-HSA-4641258	Degradation of DVL	-0.2367	-0.01592	0.22078
R-HSA-983170	Antigen Presentation: Folding, assembly and peptide loading of class I MHC	-0.3031	-0.08232	0.22078
R-HSA-69541	Stabilization of p53	-0.2519	-0.03145	0.22045
R-HSA-391251	Protein folding	-0.289	-0.06881	0.22019
R-HSA-390522	Striated Muscle Contraction	-0.218735	0.001309	0.220044
R-HSA-8848584	Wax and plasmalogen biosynthesis	-0.07023	0.1493	0.21953
R-HSA-9013424	RHOV GTPase cycle	-0.169149	0.04981	0.218959
R-HSA-2393930	Phosphate bond hydrolysis by NUDT proteins	-0.340515	-0.1216	0.218915
R-HSA-428157	Sphingolipid metabolism	-0.1498	0.06905	0.21885
R-HSA-6783589	Interleukin-6 family signaling	-0.2614	-0.04256	0.21884
R-HSA-5576892	Phase 0 - rapid depolarisation	-0.138133	0.08065	0.218783
R-HSA-4655427	SUMOylation of DNA methylation proteins	-0.198881	0.01962	0.218501
R-HSA-6788467	IL-6-type cytokine receptor ligand interactions	-0.256381	-0.03808	0.218301
R-HSA-390696	Adrenoceptors	-0.3598	-0.14244	0.21736
R-HSA-139915	Activation of PUMA and translocation to mitochondria	-0.3047	-0.08736	0.21734
R-HSA-9840309	Glycosphingolipid biosynthesis	-0.089789	0.1272	0.216989
R-HSA-6811440	Retrograde transport at the Trans-Golgi-Network	-0.324274	-0.1076	0.216674
R-HSA-2559582	Senescence-Associated Secretory Phenotype (SASP)	-0.2423	-0.02563	0.21667
R-HSA-6804114	TP53 Regulates Transcription of Genes Involved in G2 Cell Cycle Arrest	-0.2445	-0.028	0.2165
R-HSA-5654228	Phospholipase C-mediated cascade; FGFR4	-0.159859	0.05664	0.216499
R-HSA-8964041	LDL remodeling	-0.129655	0.08678	0.216435
R-HSA-71403	Citric acid cycle (TCA cycle)	-0.290361	-0.074	0.216361
R-HSA-5696400	Dual Incision in GG-NER	-0.2502	-0.03431	0.21589
R-HSA-390450	Folding of actin by CCT/TriC	-0.268034	-0.05222	0.215814
R-HSA-1566948	Elastic fibre formation	-0.1457	0.07003	0.21573
R-HSA-202433	Generation of second messenger molecules	-0.2283	-0.01258	0.21572
R-HSA-8983711	OAS antiviral response	-0.36	-0.1443	0.2157
R-HSA-9632974	NR1H2 & NR1H3 regulate gene expression linked to gluconeogenesis	-0.250208	-0.0346	0.215608
R-HSA-68952	DNA replication initiation	-0.1345	0.08109	0.21559
R-HSA-174577	Activation of C3 and C5	0.01168	0.22709	0.21541
R-HSA-425393	Transport of inorganic cations/anions and amino acids/oligopeptides	-0.1051	0.1103	0.2154
R-HSA-156590	Glutathione conjugation	-0.0578548	0.157227	0.215082
R-HSA-1482839	Acyl chain remodelling of PE	-0.1089	0.1061	0.215
R-HSA-4615885	SUMOylation of DNA replication proteins	-0.2029	0.01199	0.21489
R-HSA-432047	Passive transport by Aquaporins	-0.08947	0.1252	0.21467
R-HSA-9026527	Activated NTRK2 signals through PLCG1	-0.138577	0.07554	0.214117
R-HSA-9707616	Heme signaling	-0.264858	-0.05097	0.213888
R-HSA-6809371	Formation of the cornified envelope	-0.239292	-0.02542	0.213872
R-HSA-422356	Regulation of insulin secretion	-0.275806	-0.06201	0.213796
R-HSA-165158	Activation of AKT2	-0.1451	0.06862	0.21372
R-HSA-1236978	Cross-presentation of soluble exogenous antigens (endosomes)	-0.2185	-0.005084	0.213416
R-HSA-69601	Ubiquitin Mediated Degradation of Phosphorylated Cdc25A	-0.2165	-0.003086	0.213414
R-HSA-69610	p53-Independent DNA Damage Response	-0.2165	-0.003086	0.213414
R-HSA-69613	p53-Independent G1/S DNA damage checkpoint	-0.2165	-0.003086	0.213414
R-HSA-381340	Transcriptional regulation of white adipocyte differentiation	-0.251572	-0.03825	0.213322
R-HSA-159782	Removal of aminoterminal propeptides from gamma-carboxylated proteins	-0.0071847	0.206	0.213185
R-HSA-70326	Glucose metabolism	-0.2477	-0.03455	0.21315
R-HSA-190370	FGFR1b ligand binding and activation	-0.3868	-0.1737	0.2131
R-HSA-9634815	Transcriptional Regulation by NPAS4	-0.2086	0.004054	0.212654
R-HSA-212300	PRC2 methylates histones and DNA	-0.1675	0.04506	0.21256
R-HSA-194002	Glucocorticoid biosynthesis	0.01296	0.2254	0.21244
R-HSA-2129379	Molecules associated with elastic fibres	-0.1328	0.07933	0.21213
R-HSA-174048	APC/C:Cdc20 mediated degradation of Cyclin B	-0.2338	-0.02177	0.21203
R-HSA-8874211	CREB3 factors activate genes	-0.2472	-0.0352	0.212
R-HSA-6781827	Transcription-Coupled Nucleotide Excision Repair (TC-NER)	-0.2835	-0.07169	0.21181
R-HSA-69560	Transcriptional activation of p53 responsive genes	-0.282894	-0.07134	0.211554
R-HSA-69895	Transcriptional activation of cell cycle inhibitor p21	-0.282894	-0.07134	0.211554
R-HSA-9034015	Signaling by NTRK3 (TRKC)	-0.252676	-0.04122	0.211456
R-HSA-1855191	Synthesis of IPs in the nucleus	-0.06574	0.1456	0.21134
R-HSA-75205	Dissolution of Fibrin Clot	-0.103864	0.1073	0.211165
R-HSA-9830369	Kidney development	-0.2176	-0.006523	0.211077
R-HSA-6803205	TP53 regulates transcription of several additional cell death genes whose specific roles in p53-dependent apoptosis remain uncertain	-0.283978	-0.07338	0.210598
R-HSA-69615	G1/S DNA Damage Checkpoints	-0.2233	-0.01273	0.21057
R-HSA-166658	Complement cascade	-0.1711	0.03908	0.21018
R-HSA-375276	Peptide ligand-binding receptors	-0.2118	-0.001738	0.210062
R-HSA-196757	Metabolism of folate and pterines	-0.2659	-0.05587	0.21003
R-HSA-5689877	Josephin domain DUBs	-0.2504	-0.04039	0.21001
R-HSA-6782210	Gap-filling DNA repair synthesis and ligation in TC-NER	-0.2659	-0.05592	0.20998
R-HSA-427359	SIRT1 negatively regulates rRNA expression	-0.1657	0.04367	0.20937
R-HSA-375165	NCAM signaling for neurite out-growth	-0.294176	-0.08503	0.209146
R-HSA-189451	Heme biosynthesis	-0.0494234	0.1597	0.209123
R-HSA-9860931	Response of endothelial cells to shear stress	-0.263797	-0.05474	0.209057
R-HSA-8849468	PTK6 Regulates Proteins Involved in RNA Processing	-0.2866	-0.07755	0.20905
R-HSA-159854	Gamma-carboxylation, transport, and amino-terminal cleavage of proteins	-0.0071101	0.2019	0.20901
R-HSA-211733	Regulation of activated PAK-2p34 by proteasome mediated degradation	-0.225	-0.016	0.209
R-HSA-1221632	Meiotic synapsis	-0.2015	0.007495	0.208995
R-HSA-8849472	PTK6 Down-Regulation	-0.3126	-0.1039	0.2087
R-HSA-70171	Glycolysis	-0.239934	-0.03134	0.208594
R-HSA-2142753	Arachidonate metabolism	-0.214408	-0.006256	0.208152
R-HSA-381042	PERK regulates gene expression	-0.2558	-0.04825	0.20755
R-HSA-3295583	TRP channels	-0.1096	0.09794	0.20754
R-HSA-452723	Transcriptional regulation of pluripotent stem cells	-0.277	-0.06951	0.20749
R-HSA-9845323	Regulation of endogenous retroelements by Piwi-interacting RNAs (piRNAs)	-0.2006	0.006434	0.207034
R-HSA-203927	MicroRNA (miRNA) biogenesis	-0.3164	-0.1095	0.2069
R-HSA-9033658	Blood group systems biosynthesis	-0.0524728	0.1544	0.206873
R-HSA-1237044	Erythrocytes take up carbon dioxide and release oxygen	-0.05127	0.155348	0.206618
R-HSA-1480926	O2/CO2 exchange in erythrocytes	-0.05127	0.155348	0.206618
R-HSA-6782135	Dual incision in TC-NER	-0.2695	-0.06294	0.20656
R-HSA-69563	p53-Dependent G1 DNA Damage Response	-0.2287	-0.02239	0.20631
R-HSA-69580	p53-Dependent G1/S DNA damage checkpoint	-0.2287	-0.02239	0.20631
R-HSA-6781823	Formation of TC-NER Pre-Incision Complex	-0.3041	-0.0978	0.2063
R-HSA-2514859	Inactivation, recovery and regulation of the phototransduction cascade	-0.2923	-0.08611	0.20619
R-HSA-5358493	Synthesis of diphthamide-EEF2	0.03065	0.2368	0.20615
R-HSA-1187000	Fertilization	-0.0178986	0.1881	0.205999
R-HSA-9855142	Cellular responses to mechanical stimuli	-0.25626	-0.05034	0.20592
R-HSA-5625886	Activated PKN1 stimulates transcription of AR (androgen receptor) regulated genes KLK2 and KLK3	-0.1836	0.02219	0.20579
R-HSA-9024446	NR1H2 and NR1H3-mediated signaling	-0.251012	-0.04529	0.205722
R-HSA-2024096	HS-GAG degradation	-0.228749	-0.02307	0.205679
R-HSA-3065676	SUMO is conjugated to E1 (UBA2:SAE1)	-0.189191	0.01631	0.205501
R-HSA-2029485	Role of phospholipids in phagocytosis	-0.155334	0.05016	0.205494
R-HSA-2871796	FCERI mediated MAPK activation	-0.2629	-0.05751	0.20539
R-HSA-8934903	Receptor Mediated Mitophagy	-0.3235	-0.1182	0.2053
R-HSA-1234176	Oxygen-dependent proline hydroxylation of Hypoxia-inducible Factor Alpha	-0.2441	-0.03917	0.20493
R-HSA-525793	Myogenesis	-0.242206	-0.03749	0.204716
R-HSA-8865999	MET activates PTPN11	-0.110809	0.09366	0.204469
R-HSA-4419969	Depolymerization of the Nuclear Lamina	-0.247657	-0.04332	0.204337
R-HSA-8877330	RUNX1 and FOXP3 control the development of regulatory T lymphocytes (Tregs)	-0.31139	-0.1072	0.20419
R-HSA-446107	Type I hemidesmosome assembly	-0.203	0.001128	0.204128
R-HSA-918233	TRAF3-dependent IRF activation pathway	-0.288547	-0.0845	0.204047
R-HSA-1368082	RORA activates gene expression	-0.330249	-0.1263	0.203949
R-HSA-389948	Co-inhibition by PD-1	-0.2249	-0.02101	0.20389
R-HSA-9762293	Regulation of CDH11 gene transcription	-0.255375	-0.0517	0.203676
R-HSA-912526	Interleukin receptor SHC signaling	-0.1973	0.006372	0.203672
R-HSA-111448	Activation of NOXA and translocation to mitochondria	-0.3125	-0.109	0.2035
R-HSA-2046105	Linoleic acid (LA) metabolism	-0.215144	-0.01168	0.203464
R-HSA-2514856	The phototransduction cascade	-0.2882	-0.08477	0.20343
R-HSA-77075	RNA Pol II CTD phosphorylation and interaction with CE	-0.3682	-0.1648	0.2034
R-HSA-71262	Carnitine synthesis	-0.1699	0.03347	0.20337
R-HSA-9013106	RHOC GTPase cycle	-0.198765	0.004507	0.203272
R-HSA-111461	Cytochrome c-mediated apoptotic response	-0.225	-0.02178	0.20322
R-HSA-8949664	Processing of SMDT1	-0.2633	-0.06016	0.20314
R-HSA-5696394	DNA Damage Recognition in GG-NER	-0.243292	-0.04055	0.202742
R-HSA-8866652	Synthesis of active ubiquitin: roles of E1 and E2 enzymes	-0.2404	-0.03771	0.20269
R-HSA-6804757	Regulation of TP53 Degradation	-0.2162	-0.01376	0.20244
R-HSA-72202	Transport of Mature Transcript to Cytoplasm	-0.3152	-0.1129	0.2023
R-HSA-189445	Metabolism of porphyrins	-0.226292	-0.02448	0.201812
R-HSA-421270	Cell-cell junction organization	-0.1907	0.01105	0.20175
R-HSA-159236	Transport of Mature mRNA derived from an Intron-Containing Transcript	-0.3128	-0.1114	0.2014
R-HSA-6806003	Regulation of TP53 Expression and Degradation	-0.2182	-0.01683	0.20137
R-HSA-2559586	DNA Damage/Telomere Stress Induced Senescence	-0.2207	-0.01935	0.20135
R-HSA-428540	Activation of RAC1	-0.151659	0.04918	0.200839
R-HSA-169911	Regulation of Apoptosis	-0.2215	-0.02097	0.20053
R-HSA-9615933	Postmitotic nuclear pore complex (NPC) reformation	-0.2298	-0.02927	0.20053
R-HSA-354192	Integrin signaling	-0.2961	-0.09627	0.19983
R-HSA-8934593	Regulation of RUNX1 Expression and Activity	-0.2947	-0.09505	0.19965
R-HSA-5358346	Hedgehog ligand biogenesis	-0.2197	-0.02035	0.19935
R-HSA-5683826	Surfactant metabolism	-0.02106	0.178145	0.199205
R-HSA-1483248	Synthesis of PIPs at the ER membrane	-0.1542	0.04498	0.19918
R-HSA-179409	APC-Cdc20 mediated degradation of Nek2A	-0.2559	-0.05695	0.19895
R-HSA-9013508	NOTCH3 Intracellular Domain Regulates Transcription	-0.284967	-0.08618	0.198787
R-HSA-203615	eNOS activation	-0.2288	-0.03013	0.19867
R-HSA-1502540	Signaling by Activin	-0.209934	-0.01145	0.198484
R-HSA-190872	Transport of connexons to the plasma membrane	-0.165294	0.03298	0.198273
R-HSA-9037629	Lewis blood group biosynthesis	0.1091	0.3072	0.1981
R-HSA-3065679	SUMO is proteolytically processed	-0.184881	0.01314	0.198021
R-HSA-171007	p38MAPK events	-0.3276	-0.1298	0.1978
R-HSA-349425	Autodegradation of the E3 ubiquitin ligase COP1	-0.2493	-0.05157	0.19773
R-HSA-420029	Tight junction interactions	-0.200601	-0.002973	0.197628
R-HSA-8941855	RUNX3 regulates CDKN1A transcription	-0.277565	-0.08001	0.197555
R-HSA-9659379	Sensory processing of sound	-0.214962	-0.01751	0.197452
R-HSA-1169091	Activation of NF-kappaB in B cells	-0.2287	-0.03127	0.19743
R-HSA-9662360	Sensory processing of sound by inner hair cells of the cochlea	-0.227963	-0.03062	0.197343
R-HSA-70635	Urea cycle	0.0595372	0.2568	0.197263
R-HSA-3371571	HSF1-dependent transactivation	-0.155394	0.04182	0.197214
R-HSA-8853659	RET signaling	-0.203	-0.005891	0.197109
R-HSA-1168372	Downstream signaling events of B Cell Receptor (BCR)	-0.232	-0.0349	0.1971
R-HSA-77352	Beta oxidation of butanoyl-CoA to acetyl-CoA	-0.5303	-0.3332	0.1971
R-HSA-8956320	Nucleotide biosynthesis	-0.217418	-0.02038	0.197038
R-HSA-1971475	A tetrasaccharide linker sequence is required for GAG synthesis	-0.2288	-0.0318	0.197
R-HSA-75153	Apoptotic execution phase	-0.2332	-0.03623	0.19697
R-HSA-1250347	SHC1 events in ERBB4 signaling	-0.292734	-0.09663	0.196104
R-HSA-9759476	Regulation of Homotypic Cell-Cell Adhesion	-0.216178	-0.02008	0.196099
R-HSA-9764260	Regulation of Expression and Function of Type II Classical Cadherins	-0.216178	-0.02008	0.196099
R-HSA-8853884	Transcriptional Regulation by VENTX	-0.2761	-0.08002	0.19608
R-HSA-9759475	Regulation of CDH11 Expression and Function	-0.2247	-0.02918	0.19552
R-HSA-210746	Regulation of gene expression in endocrine-committed (NEUROG3+) progenitor cells	0.0569591	0.2524	0.195441
R-HSA-4755510	SUMOylation of immune response proteins	-0.2906	-0.09534	0.19526
R-HSA-9830364	Formation of the nephric duct	-0.2124	-0.01774	0.19466
R-HSA-1369007	Mitochondrial ABC transporters	0.01933	0.2139	0.19457
R-HSA-936440	Negative regulators of DDX58/IFIH1 signaling	-0.2314	-0.03692	0.19448
R-HSA-209952	Peptide hormone biosynthesis	0.0007672	0.1952	0.194433
R-HSA-2187338	Visual phototransduction	-0.2014	-0.007275	0.194125
R-HSA-2029480	Fcgamma receptor (FCGR) dependent phagocytosis	-0.186504	0.007309	0.193813
R-HSA-1433557	Signaling by SCF-KIT	-0.2193	-0.0256	0.1937
R-HSA-77108	Utilization of Ketone Bodies	-0.0606583	0.1327	0.193358
R-HSA-444209	Free fatty acid receptors	-0.312093	-0.1194	0.192693
R-HSA-110056	MAPK3 (ERK1) activation	-0.2088	-0.01613	0.19267
R-HSA-9020558	Interleukin-2 signaling	-0.3655	-0.1729	0.1926
R-HSA-1234174	Cellular response to hypoxia	-0.2355	-0.04299	0.19251
R-HSA-162791	Attachment of GPI anchor to uPAR	0.06538	0.2575	0.19212
R-HSA-419771	Opsins	-0.0563896	0.1351	0.19149
R-HSA-3134973	LRR FLII-interacting protein 1 (LRRFIP1) activates type I IFN production	-0.18703	0.004301	0.191331
R-HSA-9617828	FOXO-mediated transcription of cell cycle genes	-0.227399	-0.03626	0.191139
R-HSA-2173796	SMAD2/SMAD3:SMAD4 heterotrimer regulates transcription	-0.3004	-0.1095	0.1909
R-HSA-1912408	Pre-NOTCH Transcription and Translation	-0.2225	-0.03175	0.19075
R-HSA-190236	Signaling by FGFR	-0.2545	-0.06399	0.19051
R-HSA-1474290	Collagen formation	-0.179589	0.01067	0.190259
R-HSA-170822	Regulation of Glucokinase by Glucokinase Regulatory Protein	-0.2163	-0.02607	0.19023
R-HSA-397014	Muscle contraction	-0.173067	0.01713	0.190197
R-HSA-74749	Signal attenuation	-0.273614	-0.08349	0.190124
R-HSA-5654720	PI-3K cascade:FGFR4	-0.0912889	0.09879	0.190079
R-HSA-5654227	Phospholipase C-mediated cascade; FGFR3	-0.139695	0.04987	0.189565
R-HSA-5654689	PI-3K cascade:FGFR1	-0.146298	0.04325	0.189548
R-HSA-8980692	RHOA GTPase cycle	-0.211376	-0.02253	0.188846
R-HSA-6811436	COPI-independent Golgi-to-ER retrograde traffic	-0.2992	-0.1104	0.1888
R-HSA-8866904	Negative regulation of activity of TFAP2 (AP-2) family transcription factors	-0.151637	0.03704	0.188676
R-HSA-450294	MAP kinase activation	-0.2667	-0.07804	0.18866
R-HSA-196780	Biotin transport and metabolism	-0.07973	0.1086	0.18833
R-HSA-177504	Retrograde neurotrophin signalling	-0.271	-0.08269	0.18831
R-HSA-163767	PP2A-mediated dephosphorylation of key metabolic factors	-0.2638	-0.0756948	0.188105
R-HSA-156581	Methylation	-0.165295	0.0227	0.187995
R-HSA-1912399	Pre-NOTCH Processing in the Endoplasmic Reticulum	-0.426002	-0.2384	0.187602
R-HSA-8939247	RUNX1 regulates transcription of genes involved in interleukin signaling	-0.473656	-0.2861	0.187556
R-HSA-1266695	Interleukin-7 signaling	-0.2778	-0.09039	0.18741
R-HSA-1834949	Cytosolic sensors of pathogen-associated DNA	-0.277	-0.08975	0.18725
R-HSA-5578775	Ion homeostasis	-0.20238	-0.01533	0.18705
R-HSA-350562	Regulation of ornithine decarboxylase (ODC)	-0.2169	-0.02998	0.18692
R-HSA-193144	Estrogen biosynthesis	-0.3656	-0.1789	0.1867
R-HSA-9026286	Biosynthesis of DPAn-3-derived protectins and resolvins	-0.0391865	0.1474	0.186586
R-HSA-418555	G alpha (s) signalling events	-0.180002	0.005987	0.185989
R-HSA-4641257	Degradation of AXIN	-0.2052	-0.0195	0.1857
R-HSA-9833576	CDH11 homotypic and heterotypic interactions	-0.155	0.03029	0.18529
R-HSA-75815	Ubiquitin-dependent degradation of Cyclin D	-0.2019	-0.01668	0.18522
R-HSA-917729	Endosomal Sorting Complex Required For Transport (ESCRT)	-0.199	-0.01383	0.18517
R-HSA-351202	Metabolism of polyamines	-0.2197	-0.03456	0.18514
R-HSA-5654695	PI-3K cascade:FGFR2	-0.128662	0.05627	0.184932
R-HSA-9761174	Formation of intermediate mesoderm	-0.2709	-0.08605	0.18485
R-HSA-977606	Regulation of Complement cascade	-0.1371	0.04748	0.18458
R-HSA-9024909	BDNF activates NTRK2 (TRKB) signaling	-0.004161	0.1804	0.184561
R-HSA-1169092	Activation of RAS in B cells	-0.398695	-0.2142	0.184495
R-HSA-3065678	SUMO is transferred from E1 to E2 (UBE2I, UBC9)	-0.154791	0.02961	0.184401
R-HSA-9034793	Activated NTRK3 signals through PLCG1	-0.152339	0.03188	0.184219
R-HSA-6807004	Negative regulation of MET activity	-0.1846	-0.0004013	0.184199
R-HSA-1247673	Erythrocytes take up oxygen and release carbon dioxide	-0.0121672	0.171794	0.183961
R-HSA-6782861	Synthesis of wybutosine at G37 of tRNA(Phe)	0.02997	0.2139	0.18393
R-HSA-9762292	Regulation of CDH11 function	-0.1674	0.01651	0.18391
R-HSA-446199	Synthesis of Dolichyl-phosphate	0.2215	0.405369	0.183869
R-HSA-73930	Abasic sugar-phosphate removal via the single-nucleotide replacement pathway	-0.0552863	0.1285	0.183786
R-HSA-8985947	Interleukin-9 signaling	-0.3335	-0.1506	0.1829
R-HSA-75896	Plasmalogen biosynthesis	0.05093	0.2338	0.18287
R-HSA-5654710	PI-3K cascade:FGFR3	-0.101613	0.08093	0.182543
R-HSA-5213460	RIPK1-mediated regulated necrosis	-0.2147	-0.03242	0.18228
R-HSA-5633008	TP53 Regulates Transcription of Cell Death Genes	-0.220608	-0.03864	0.181968
R-HSA-9907900	Proteasome assembly	-0.2077	-0.02582	0.18188
R-HSA-211976	Endogenous sterols	-0.234969	-0.0530925	0.181877
R-HSA-1483257	Phospholipid metabolism	-0.202119	-0.02029	0.181829
R-HSA-432722	Golgi Associated Vesicle Biogenesis	-0.206568	-0.02475	0.181818
R-HSA-159763	Transport of gamma-carboxylated protein precursors from the endoplasmic reticulum to the Golgi apparatus	-0.0191617	0.1626	0.181762
R-HSA-9623433	NR1H2 & NR1H3 regulate gene expression to control bile acid homeostasis	-0.353793	-0.1723	0.181493
R-HSA-446728	Cell junction organization	-0.2104	-0.02931	0.18109
R-HSA-5675482	Regulation of necroptotic cell death	-0.2107	-0.02969	0.18101
R-HSA-9824594	Regulation of MITF-M-dependent genes involved in apoptosis	-0.2912	-0.1102	0.181
R-HSA-202131	Metabolism of nitric oxide: NOS3 activation and regulation	-0.216518	-0.03552	0.180998
R-HSA-203641	NOSTRIN mediated eNOS trafficking	-0.198462	-0.01778	0.180682
R-HSA-9006335	Signaling by Erythropoietin	-0.210218	-0.02981	0.180408
R-HSA-9667769	Acetylcholine inhibits contraction of outer hair cells	0.07947	0.2595	0.18003
R-HSA-1483152	Hydrolysis of LPE	-0.689	-0.509	0.18
R-HSA-9758274	Regulation of NF-kappa B signaling	-0.2575	-0.07766	0.17984
R-HSA-5674135	MAP2K and MAPK activation	-0.251926	-0.07213	0.179796
R-HSA-3371497	HSP90 chaperone cycle for steroid hormone receptors (SHR) in the presence of ligand	-0.1823	-0.002516	0.179784
R-HSA-9026403	Biosynthesis of DPAn-3-derived 13-series resolvins	-0.0265068	0.1532	0.179707
R-HSA-9027604	Biosynthesis of electrophilic 蠅-3 PUFA oxo-derivatives	-0.0273301	0.152	0.17933
R-HSA-5649702	APEX1-Independent Resolution of AP Sites via the Single Nucleotide Replacement Pathway	-0.1246	0.0546534	0.179253
R-HSA-5576891	Cardiac conduction	-0.15529	0.02396	0.179251
R-HSA-8854214	TBC/RABGAPs	-0.2468	-0.06758	0.17922
R-HSA-512988	Interleukin-3, Interleukin-5 and GM-CSF signaling	-0.181	-0.001817	0.179183
R-HSA-110362	POLB-Dependent Long Patch Base Excision Repair	-0.09814	0.08069	0.17883
R-HSA-159740	Gamma-carboxylation of protein precursors	-0.0171693	0.1616	0.178769
R-HSA-877312	Regulation of IFNG signaling	-0.2758	-0.09723	0.17857
R-HSA-113507	E2F-enabled inhibition of pre-replication complex formation	-0.05014	0.1282	0.17834
R-HSA-9859138	BCKDH synthesizes BCAA-CoA from KIC, KMVA, KIV	-0.1299	0.04843	0.17833
R-HSA-400253	Circadian Clock	-0.2373	-0.05913	0.17817
R-HSA-983189	Kinesins	-0.112821	0.06493	0.177751
R-HSA-174154	APC/C:Cdc20 mediated degradation of Securin	-0.2165	-0.03907	0.17743
R-HSA-373752	Netrin-1 signaling	-0.1708	0.006591	0.177391
R-HSA-1855167	Synthesis of pyrophosphates in the cytosol	-0.124	0.05299	0.17699
R-HSA-5654738	Signaling by FGFR2	-0.2582	-0.08131	0.17689
R-HSA-196741	Cobalamin (Cbl, vitamin B12) transport and metabolism	-0.1452	0.03157	0.17677
R-HSA-448424	Interleukin-17 signaling	-0.2614	-0.08492	0.17648
R-HSA-425397	Transport of vitamins, nucleosides, and related molecules	-0.154192	0.02226	0.176452
R-HSA-9927354	Co-stimulation by ICOS	-0.153674	0.02259	0.176264
R-HSA-2453902	The canonical retinoid cycle in rods (twilight vision)	-0.152145	0.0237	0.175845
R-HSA-190704	Oligomerization of connexins into connexons	-0.1577	0.01787	0.17557
R-HSA-190827	Transport of connexins along the secretory pathway	-0.1577	0.01787	0.17557
R-HSA-3215018	Processing and activation of SUMO	-0.139248	0.03629	0.175538
R-HSA-114508	Effects of PIP2 hydrolysis	-0.2423	-0.06682	0.17548
R-HSA-211000	Gene Silencing by RNA	-0.2085	-0.03304	0.17546
R-HSA-5696395	Formation of Incision Complex in GG-NER	-0.2356	-0.06019	0.17541
R-HSA-9842663	Signaling by LTK	-0.168423	0.006226	0.174649
R-HSA-193775	Synthesis of bile acids and bile salts via 24-hydroxycholesterol	-0.1952	-0.0206402	0.17456
R-HSA-5696399	Global Genome Nucleotide Excision Repair (GG-NER)	-0.219669	-0.04524	0.174429
R-HSA-196854	Metabolism of vitamins and cofactors	-0.1851	-0.01072	0.17438
R-HSA-163680	AMPK inhibits chREBP transcriptional activation activity	-0.144222	0.0296	0.173822
R-HSA-447043	Neurofascin interactions	-0.1713	0.002268	0.173568
R-HSA-9845576	Glycosphingolipid transport	-0.496001	-0.3225	0.173502
R-HSA-1980145	Signaling by NOTCH2	-0.149587	0.02357	0.173157
R-HSA-5668599	RHO GTPases Activate NADPH Oxidases	-0.215988	-0.04287	0.173118
R-HSA-450282	MAPK targets/ Nuclear events mediated by MAP kinases	-0.2866	-0.1139	0.1727
R-HSA-2564830	Cytosolic iron-sulfur cluster assembly	-0.0112329	0.1613	0.172533
R-HSA-1482925	Acyl chain remodelling of PG	0.182946	0.3554	0.172454
R-HSA-140180	COX reactions	-0.1508	0.02149	0.17229
R-HSA-1855231	Synthesis of IPs in the ER lumen	-0.1783	-0.006241	0.172059
R-HSA-9824878	Regulation of TBK1, IKK蔚 (IKBKE)-mediated activation of IRF3, IRF7	-0.2106	-0.03858	0.17202
R-HSA-190374	FGFR1c and Klotho ligand binding and activation	-0.2907	-0.1189	0.1718
R-HSA-1296025	ATP sensitive Potassium channels	0.4444	0.6161	0.1717
R-HSA-916853	Degradation of GABA	0.4466	0.6183	0.1717
R-HSA-8964540	Alanine metabolism	0.5186	0.6902	0.1716
R-HSA-1299361	TWIK-related alkaline pH activated K+ channel (TALK)	0.4561	0.6277	0.1716
R-HSA-1362277	Transcription of E2F targets under negative control by DREAM complex	-0.2764	-0.1048	0.1716
R-HSA-141334	PAOs oxidise polyamines to amines	0.3395	0.5111	0.1716
R-HSA-177162	Conjugation of phenylacetate with glutamine	0.5945	0.7661	0.1716
R-HSA-373756	SDK interactions	0.3725	0.5439	0.1714
R-HSA-211916	Vitamins	0.2597	0.4311	0.1714
R-HSA-8853383	Lysosomal oligosaccharide catabolism	-0.05566	0.1157	0.17136
R-HSA-9640463	Wax biosynthesis	-0.2476	-0.07631	0.17129
R-HSA-6803207	TP53 Regulates Transcription of Caspase Activators and Caspases	-0.2327	-0.06156	0.17114
R-HSA-5651801	PCNA-Dependent Long Patch Base Excision Repair	-0.09597	0.07501	0.17098
R-HSA-1483076	Synthesis of CL	-0.7393	-0.5684	0.1709
R-HSA-163685	Integration of energy metabolism	-0.237577	-0.06705	0.170527
R-HSA-5654219	Phospholipase C-mediated cascade: FGFR1	-0.187642	-0.01827	0.169372
R-HSA-912446	Meiotic recombination	-0.07986	0.08951	0.16937
R-HSA-5610780	Degradation of GLI1 by the proteasome	-0.1869	-0.01814	0.16876
R-HSA-9764302	Regulation of CDH19 Expression and Function	-0.1526	0.01609	0.16869
R-HSA-8956319	Nucleotide catabolism	-0.185037	-0.01647	0.168567
R-HSA-9754119	Drug-mediated inhibition of CDK4/CDK6 activity	-0.205	-0.03675	0.16825
R-HSA-74752	Signaling by Insulin receptor	-0.1656	0.002559	0.168159
R-HSA-390471	Association of TriC/CCT with target proteins during biosynthesis	-0.275	-0.107	0.168
R-HSA-111458	Formation of apoptosome	-0.199084	-0.03128	0.167804
R-HSA-9627069	Regulation of the apoptosome activity	-0.199084	-0.03128	0.167804
R-HSA-5657655	MGMT-mediated DNA damage reversal	-0.8528	-0.685	0.1678
R-HSA-9616222	Transcriptional regulation of granulopoiesis	-0.2255	-0.05776	0.16774
R-HSA-9717207	Sensory perception of sweet, bitter, and umami (glutamate) taste	-0.02472	0.1429	0.16762
R-HSA-435368	Zinc efflux and compartmentalization by the SLC30 family	-0.2384	-0.07088	0.16752
R-HSA-9020933	Interleukin-23 signaling	-0.1717	-0.004374	0.167326
R-HSA-429593	Inositol transporters	-0.210489	-0.04319	0.167299
R-HSA-9828211	Regulation of TBK1, IKK蔚-mediated activation of IRF3, IRF7 upon TLR3 ligation	-0.2098	-0.0426	0.1672
R-HSA-389513	Co-inhibition by CTLA4	-0.2543	-0.08745	0.16685
R-HSA-9762114	GSK3B and BTRC:CUL1-mediated-degradation of NFE2L2	-0.2029	-0.03615	0.16675
R-HSA-392154	Nitric oxide stimulates guanylate cyclase	0.003653	0.1704	0.166747
R-HSA-112382	Formation of RNA Pol II elongation complex	-0.2651	-0.09842	0.16668
R-HSA-75955	RNA Polymerase II Transcription Elongation	-0.2651	-0.09842	0.16668
R-HSA-9772755	Formation of WDR5-containing histone-modifying complexes	-0.1729	-0.006304	0.166596
R-HSA-174084	Autodegradation of Cdh1 by Cdh1:APC/C	-0.205	-0.03846	0.16654
R-HSA-9824272	Somitogenesis	-0.2095	-0.04304	0.16646
R-HSA-1638091	Heparan sulfate/heparin (HS-GAG) metabolism	-0.17516	-0.008832	0.166328
R-HSA-5578768	Physiological factors	-0.227786	-0.0617538	0.166033
R-HSA-1474165	Reproduction	-0.1349	0.03113	0.16603
R-HSA-427652	Sodium-coupled phosphate cotransporters	-0.381617	-0.2162	0.165417
R-HSA-73933	Resolution of Abasic Sites (AP sites)	-0.138199	0.02716	0.165359
R-HSA-5654221	Phospholipase C-mediated cascade; FGFR2	-0.175801	-0.01051	0.165291
R-HSA-1660517	Synthesis of PIPs at the late endosome membrane	-0.216422	-0.05119	0.165232
R-HSA-9022707	MECP2 regulates transcription factors	-0.3713	-0.2068	0.1645
R-HSA-1989781	PPARA activates gene expression	-0.219832	-0.0555	0.164332
R-HSA-2173795	Downregulation of SMAD2/3:SMAD4 transcriptional activity	-0.2564	-0.09212	0.16428
R-HSA-8854691	Interleukin-20 family signaling	-0.2306	-0.06655	0.16405
R-HSA-447038	NrCAM interactions	0.1184	0.282014	0.163614
R-HSA-9701898	STAT3 nuclear events downstream of ALK signaling	-0.2667	-0.1031	0.1636
R-HSA-68867	Assembly of the pre-replicative complex	-0.1887	-0.02513	0.16357
R-HSA-427413	NoRC negatively regulates rRNA expression	-0.235	-0.0715	0.1635
R-HSA-9793380	Formation of paraxial mesoderm	-0.222	-0.05874	0.16326
R-HSA-201556	Signaling by ALK	-0.269314	-0.1064	0.162914
R-HSA-1181150	Signaling by NODAL	-0.195856	-0.03296	0.162896
R-HSA-8941856	RUNX3 regulates NOTCH signaling	-0.281037	-0.1182	0.162836
R-HSA-8983432	Interleukin-15 signaling	-0.227	-0.0642	0.1628
R-HSA-9634600	Regulation of glycolysis by fructose 2,6-bisphosphate metabolism	-0.271	-0.1084	0.1626
R-HSA-68911	G2 Phase	-0.03761	0.1249	0.16251
R-HSA-418360	Platelet calcium homeostasis	-0.1297	0.0328	0.1625
R-HSA-9020958	Interleukin-21 signaling	-0.346	-0.1835	0.1625
R-HSA-159231	Transport of Mature mRNA Derived from an Intronless Transcript	-0.2262	-0.06372	0.16248
R-HSA-4608870	Asymmetric localization of PCP proteins	-0.1904	-0.02924	0.16116
R-HSA-1433617	Regulation of signaling by NODAL	0.08186	0.243001	0.161141
R-HSA-2995383	Initiation of Nuclear Envelope (NE) Reformation	-0.216404	-0.05538	0.161024
R-HSA-5601884	PIWI-interacting RNA (piRNA) biogenesis	-0.2641	-0.1031	0.161
R-HSA-76061	RNA Polymerase III Transcription Initiation From Type 1 Promoter	-0.2957	-0.1352	0.1605
R-HSA-888568	GABA synthesis	-0.243	-0.08286	0.16014
R-HSA-111885	Opioid Signalling	-0.2619	-0.1022	0.1597
R-HSA-8854050	FBXL7 down-regulates AURKA during mitotic entry and in early mitosis	-0.1771	-0.0174	0.1597
R-HSA-9913635	Strand-asynchronous mitochondrial DNA replication	0.009157	0.1687	0.159543
R-HSA-1482788	Acyl chain remodelling of PC	-0.193017	-0.03351	0.159507
R-HSA-5610785	GLI3 is processed to GLI3R by the proteasome	-0.1742	-0.01479	0.15941
R-HSA-2995410	Nuclear Envelope (NE) Reassembly	-0.2217	-0.0623	0.1594
R-HSA-3296197	Hydroxycarboxylic acid-binding receptors	-0.2911	-0.1317	0.1594
R-HSA-352238	Breakdown of the nuclear lamina	-0.1267	0.03255	0.15925
R-HSA-9013973	TICAM1-dependent activation of IRF3/IRF7	-0.2064	-0.04734	0.15906
R-HSA-419408	Lysosphingolipid and LPA receptors	-0.1616	-0.0027058	0.158894
R-HSA-9845614	Sphingolipid catabolism	-0.2788	-0.12	0.1588
R-HSA-196791	Vitamin D (calciferol) metabolism	-0.07585	0.08284	0.15869
R-HSA-3232142	SUMOylation of ubiquitinylation proteins	-0.1615	-0.002874	0.158626
R-HSA-8981607	Intracellular oxygen transport	0.35	0.5086	0.1586
R-HSA-5610783	Degradation of GLI2 by the proteasome	-0.1746	-0.01618	0.15842
R-HSA-204998	Cell death signalling via NRAGE, NRIF and NADE	-0.184	-0.02564	0.15836
R-HSA-427389	ERCC6 (CSB) and EHMT2 (G9a) positively regulate rRNA expression	-0.1771	-0.01878	0.15832
R-HSA-9796292	Formation of axial mesoderm	-0.167921	-0.009699	0.158222
R-HSA-159227	Transport of the SLBP independent Mature mRNA	-0.2184	-0.06026	0.15814
R-HSA-113510	E2F mediated regulation of DNA replication	-0.2004	-0.0422867	0.158113
R-HSA-176409	APC/C:Cdc20 mediated degradation of mitotic proteins	-0.1985	-0.04088	0.15762
R-HSA-3371568	Attenuation phase	-0.125243	0.03226	0.157503
R-HSA-399719	Trafficking of AMPA receptors	-0.1823	-0.02525	0.15705
R-HSA-399721	Glutamate binding, activation of AMPA receptors and synaptic plasticity	-0.1823	-0.02525	0.15705
R-HSA-2428928	IRS-related events triggered by IGF1R	-0.1405	0.01635	0.15685
R-HSA-381038	XBP1(S) activates chaperone genes	-0.2133	-0.05654	0.15676
R-HSA-71288	Creatine metabolism	-0.05046	0.1062	0.15666
R-HSA-8851680	Butyrophilin (BTN) family interactions	0.0078828	0.1644	0.156517
R-HSA-880009	Interconversion of 2-oxoglutarate and 2-hydroxyglutarate	0.5082	0.6646	0.1564
R-HSA-2404192	Signaling by Type 1 Insulin-like Growth Factor 1 Receptor (IGF1R)	-0.1448	0.01151	0.15631
R-HSA-2428924	IGF1R signaling cascade	-0.1448	0.01151	0.15631
R-HSA-389960	Formation of tubulin folding intermediates by CCT/TriC	-0.283341	-0.1275	0.155841
R-HSA-373080	Class B/2 (Secretin family receptors)	-0.115738	0.0401	0.155838
R-HSA-9839389	TGFBR3 regulates TGF-beta signaling	-0.188627	-0.03308	0.155547
R-HSA-6784531	tRNA processing in the nucleus	-0.2896	-0.1342	0.1554
R-HSA-400206	Regulation of lipid metabolism by PPARalpha	-0.219842	-0.06456	0.155282
R-HSA-174184	Cdc20:Phospho-APC/C mediated degradation of Cyclin A	-0.1971	-0.04192	0.15518
R-HSA-5632684	Hedgehog 'on' state	-0.1594	-0.004399	0.155001
R-HSA-9768919	NPAS4 regulates expression of target genes	-0.1599	-0.005781	0.154119
R-HSA-179419	APC:Cdc20 mediated degradation of cell cycle proteins prior to satisfation of the cell cycle checkpoint	-0.1981	-0.04402	0.15408
R-HSA-5693571	Nonhomologous End-Joining (NHEJ)	-0.1967	-0.04291	0.15379
R-HSA-4570464	SUMOylation of RNA binding proteins	-0.243964	-0.09116	0.152804
R-HSA-381070	IRE1alpha activates chaperones	-0.207	-0.05425	0.15275
R-HSA-2979096	NOTCH2 Activation and Transmission of Signal to the Nucleus	-0.122429	0.03014	0.152569
R-HSA-446193	Biosynthesis of the N-glycan precursor (dolichol lipid-linked oligosaccharide, LLO) and transfer to a nascent protein	-0.173113	-0.02069	0.152423
R-HSA-174113	SCF-beta-TrCP mediated degradation of Emi1	-0.1928	-0.04085	0.15195
R-HSA-430116	GP1b-IX-V activation signalling	-0.177791	-0.02594	0.151851
R-HSA-9708530	Regulation of BACH1 activity	-0.1328	0.01896	0.15176
R-HSA-9609736	Assembly and cell surface presentation of NMDA receptors	-0.1087	0.04302	0.15172
R-HSA-1538133	G0 and Early G1	-0.2457	-0.09401	0.15169
R-HSA-2046104	alpha-linolenic (omega3) and linoleic (omega6) acid metabolism	-0.213558	-0.0619	0.151658
R-HSA-2046106	alpha-linolenic acid (ALA) metabolism	-0.213558	-0.0619	0.151658
R-HSA-74158	RNA Polymerase III Transcription	-0.2734	-0.1218	0.1516
R-HSA-749476	RNA Polymerase III Abortive And Retractive Initiation	-0.2734	-0.1218	0.1516
R-HSA-6811442	Intra-Golgi and retrograde Golgi-to-ER traffic	-0.24399	-0.09243	0.15156
R-HSA-2299718	Condensation of Prophase Chromosomes	-0.161422	-0.01013	0.151292
R-HSA-201451	Signaling by BMP	-0.23162	-0.08058	0.15104
R-HSA-5676594	TNF receptor superfamily (TNFSF) members mediating non-canonical NF-kB pathway	-0.1152	0.03581	0.15101
R-HSA-110373	Resolution of AP sites via the multiple-nucleotide patch replacement pathway	-0.08281	0.06799	0.1508
R-HSA-1614558	Degradation of cysteine and homocysteine	-0.2233	-0.0727364	0.150564
R-HSA-2871809	FCERI mediated Ca+2 mobilization	-0.1958	-0.04582	0.14998
R-HSA-9823730	Formation of definitive endoderm	-0.244013	-0.09438	0.149633
R-HSA-9022927	MECP2 regulates transcription of genes involved in GABA signaling	-0.258992	-0.1096	0.149392
R-HSA-381183	ATF6 (ATF6-alpha) activates chaperone genes	-0.2096	-0.06028	0.14932
R-HSA-210745	Regulation of gene expression in beta cells	-0.20454	-0.05543	0.14911
R-HSA-9006115	Signaling by NTRK2 (TRKB)	-0.164429	-0.01543	0.148999
R-HSA-159234	Transport of Mature mRNAs Derived from Intronless Transcripts	-0.226	-0.07708	0.14892
R-HSA-6804758	Regulation of TP53 Activity through Acetylation	-0.223681	-0.07537	0.148311
R-HSA-6783783	Interleukin-10 signaling	-0.184043	-0.03576	0.148283
R-HSA-9013026	RHOB GTPase cycle	-0.175804	-0.02763	0.148174
R-HSA-912694	Regulation of IFNA/IFNB signaling	-0.1867	-0.03857	0.14813
R-HSA-73772	RNA Polymerase I Promoter Escape	-0.1976	-0.04953	0.14807
R-HSA-211981	Xenobiotics	-0.342	-0.193999	0.148001
R-HSA-76066	RNA Polymerase III Transcription Initiation From Type 2 Promoter	-0.292	-0.1442	0.1478
R-HSA-381033	ATF6 (ATF6-alpha) activates chaperones	-0.2076	-0.05982	0.14778
R-HSA-936964	Activation of IRF3, IRF7 mediated by TBK1, IKK蔚 (IKBKE)	-0.1843	-0.03657	0.14773
R-HSA-9018682	Biosynthesis of maresins	0.0846399	0.2323	0.14766
R-HSA-9013420	RHOU GTPase cycle	-0.166462	-0.0192	0.147262
R-HSA-427975	Proton/oligopeptide cotransporters	-0.1478	-0.0006284	0.147172
R-HSA-2151209	Activation of PPARGC1A (PGC-1alpha) by phosphorylation	-0.1234	0.02357	0.14697
R-HSA-1500620	Meiosis	-0.1381	0.008802	0.146902
R-HSA-111465	Apoptotic cleavage of cellular proteins	-0.2005	-0.0537	0.1468
R-HSA-429958	mRNA decay by 3' to 5' exoribonuclease	-0.211016	-0.06422	0.146796
R-HSA-2022854	Keratan sulfate biosynthesis	-0.231348	-0.08479	0.146558
R-HSA-451927	Interleukin-2 family signaling	-0.1884	-0.04204	0.14636
R-HSA-446219	Synthesis of substrates in N-glycan biosythesis	-0.176576	-0.03088	0.145696
R-HSA-113501	Inhibition of replication initiation of damaged DNA by RB1/E2F1	-0.2757	-0.130304	0.145396
R-HSA-9013695	NOTCH4 Intracellular Domain Regulates Transcription	-0.249306	-0.1043	0.145006
R-HSA-159230	Transport of the SLBP Dependant Mature mRNA	-0.2188	-0.07414	0.14466
R-HSA-1170546	Prolactin receptor signaling	-0.1363	0.007711	0.144011
R-HSA-210744	Regulation of gene expression in late stage (branching morphogenesis) pancreatic bud precursor cells	-0.221324	-0.07744	0.143884
R-HSA-9613354	Lipophagy	-0.166557	-0.0236	0.142957
R-HSA-388479	Vasopressin-like receptors	0.314252	0.457	0.142748
R-HSA-9758919	Epithelial-Mesenchymal Transition (EMT) during gastrulation	-0.1675	-0.0247737	0.142726
R-HSA-2122947	NOTCH1 Intracellular Domain Regulates Transcription	-0.2516	-0.1089	0.1427
R-HSA-8877627	Vitamin E transport	-0.159679	-0.01745	0.142229
R-HSA-69017	CDK-mediated phosphorylation and removal of Cdc6	-0.1712	-0.029	0.1422
R-HSA-69186	Lagging Strand Synthesis	-0.04507	0.09712	0.14219
R-HSA-203754	NOSIP mediated eNOS trafficking	-0.1043	0.03768	0.14198
R-HSA-380994	ATF4 activates genes in response to endoplasmic reticulum stress	-0.2185	-0.07724	0.14126
R-HSA-674695	RNA Polymerase II Pre-transcription Events	-0.2479	-0.107	0.1409
R-HSA-5654736	Signaling by FGFR1	-0.1721	-0.03185	0.14025
R-HSA-417957	P2Y receptors	-0.251657	-0.112	0.139657
R-HSA-5250941	Negative epigenetic regulation of rRNA expression	-0.1917	-0.05265	0.13905
R-HSA-176974	Unwinding of DNA	-0.0513	0.08774	0.13904
R-HSA-6811434	COPI-dependent Golgi-to-ER retrograde traffic	-0.215067	-0.07613	0.138937
R-HSA-3214841	PKMTs methylate histone lysines	-0.186	-0.0471	0.1389
R-HSA-2022928	HS-GAG biosynthesis	-0.137795	0.0002942	0.138089
R-HSA-5223345	Miscellaneous transport and binding events	-0.177177	-0.03919	0.137987
R-HSA-1482801	Acyl chain remodelling of PS	0.180581	0.3185	0.137919
R-HSA-428542	Regulation of commissural axon pathfinding by SLIT and ROBO	-0.1541	-0.0169724	0.137128
R-HSA-1912420	Pre-NOTCH Processing in Golgi	-0.4033	-0.2666	0.1367
R-HSA-5654719	SHC-mediated cascade:FGFR4	-0.304952	-0.1683	0.136652
R-HSA-205025	NADE modulates death signalling	-0.04799	0.08864	0.13663
R-HSA-5620922	BBSome-mediated cargo-targeting to cilium	-0.2487	-0.1123	0.1364
R-HSA-8978868	Fatty acid metabolism	-0.160858	-0.02476	0.136098
R-HSA-9834899	Specification of the neural plate border	-0.174407	-0.03838	0.136027
R-HSA-5693607	Processing of DNA double-strand break ends	-0.1433	-0.007363	0.135937
R-HSA-9843743	Transcriptional regulation of brown and beige adipocyte differentiation	-0.254322	-0.1185	0.135822
R-HSA-9844594	Transcriptional regulation of brown and beige adipocyte differentiation by EBF2	-0.254322	-0.1185	0.135822
R-HSA-9029558	NR1H2 & NR1H3 regulate gene expression linked to lipogenesis	-0.235907	-0.1001	0.135807
R-HSA-1655829	Regulation of cholesterol biosynthesis by SREBP (SREBF)	-0.242291	-0.1066	0.135691
R-HSA-5654716	Downstream signaling of activated FGFR4	-0.0830436	0.05251	0.135554
R-HSA-1295596	Spry regulation of FGF signaling	-0.198	-0.0625	0.1355
R-HSA-1368108	BMAL1:CLOCK,NPAS2 activates circadian gene expression	-0.241544	-0.1062	0.135344
R-HSA-191650	Regulation of gap junction activity	-0.2002	-0.0651667	0.135033
R-HSA-6804116	TP53 Regulates Transcription of Genes Involved in G1 Cell Cycle Arrest	-0.224596	-0.08976	0.134836
R-HSA-8856688	Golgi-to-ER retrograde transport	-0.233975	-0.09915	0.134825
R-HSA-6796648	TP53 Regulates Transcription of DNA Repair Genes	-0.2135	-0.07871	0.13479
R-HSA-1483115	Hydrolysis of LPC	-0.263146	-0.1286	0.134546
R-HSA-6807505	RNA polymerase II transcribes snRNA genes	-0.274	-0.1399	0.1341
R-HSA-1483166	Synthesis of PA	0.06032	0.1942	0.13388
R-HSA-8849470	PTK6 Regulates Cell Cycle	-0.0704681	0.06341	0.133878
R-HSA-9793242	SUMOylation of nuclear envelope proteins	-0.1816	-0.04788	0.13372
R-HSA-70921	Histidine catabolism	0.1485	0.282064	0.133564
R-HSA-442380	Zinc influx into cells by the SLC39 gene family	-0.03158	0.10187	0.13345
R-HSA-76046	RNA Polymerase III Transcription Initiation	-0.2733	-0.14	0.1333
R-HSA-8936459	RUNX1 regulates genes involved in megakaryocyte differentiation and platelet function	-0.1935	-0.06028	0.13322
R-HSA-9033500	TYSND1 cleaves peroxisomal proteins	-0.2018	-0.06902	0.13278
R-HSA-2032785	YAP1- and WWTR1 (TAZ)-stimulated gene expression	-0.106547	0.02619	0.132737
R-HSA-200425	Carnitine shuttle	-0.127651	0.004877	0.132528
R-HSA-211897	Cytochrome P450 - arranged by substrate type	-0.2599	-0.127441	0.132459
R-HSA-186797	Signaling by PDGF	-0.113629	0.01869	0.132319
R-HSA-1483255	PI Metabolism	-0.168164	-0.03623	0.131934
R-HSA-446388	Regulation of cytoskeletal remodeling and cell spreading by IPP complex components	-0.208106	-0.07635	0.131756
R-HSA-3899300	SUMOylation of transcription cofactors	-0.120726	0.01063	0.131356
R-HSA-6811555	PI5P Regulates TP53 Acetylation	-0.2254	-0.09461	0.13079
R-HSA-114452	Activation of BH3-only proteins	-0.200917	-0.07019	0.130727
R-HSA-9825895	Regulation of MITF-M-dependent genes involved in DNA replication, damage repair and senescence	0.0387537	0.1689	0.130146
R-HSA-5663220	RHO GTPases Activate Formins	-0.186308	-0.05619	0.130118
R-HSA-186712	Regulation of beta-cell development	-0.202516	-0.07294	0.129576
R-HSA-5654733	Negative regulation of FGFR4 signaling	-0.1949	-0.06539	0.12951
R-HSA-8866911	TFAP2 (AP-2) family regulates transcription of cell cycle factors	-0.298386	-0.1691	0.129286
R-HSA-211945	Phase I - Functionalization of compounds	-0.1181	0.0110362	0.129136
R-HSA-392517	Rap1 signalling	-0.1725	-0.0434	0.1291
R-HSA-5654708	Downstream signaling of activated FGFR3	-0.0772329	0.05174	0.128973
R-HSA-379716	Cytosolic tRNA aminoacylation	-0.256643	-0.12773	0.128913
R-HSA-174178	APC/C:Cdh1 mediated degradation of Cdc20 and other APC/C:Cdh1 targeted proteins in late mitosis/early G1	-0.1809	-0.05241	0.12849
R-HSA-2980736	Peptide hormone metabolism	-0.189576	-0.06123	0.128346
R-HSA-201688	WNT mediated activation of DVL	-0.2751	-0.1471	0.128
R-HSA-109704	PI3K Cascade	-0.06711	0.06085	0.12796
R-HSA-5654696	Downstream signaling of activated FGFR2	-0.0968306	0.03088	0.127711
R-HSA-3249367	STAT6-mediated induction of chemokines	-0.3944	-0.2671	0.1273
R-HSA-6807878	COPI-mediated anterograde transport	-0.222962	-0.09572	0.127242
R-HSA-187577	SCF(Skp2)-mediated degradation of p27/p21	-0.1486	-0.02163	0.12697
R-HSA-375280	Amine ligand-binding receptors	-0.179	-0.0520926	0.126907
R-HSA-176814	Activation of APC/C and APC/C:Cdc20 mediated degradation of mitotic proteins	-0.1749	-0.04801	0.12689
R-HSA-5654687	Downstream signaling of activated FGFR1	-0.0882264	0.03858	0.126806
R-HSA-6807047	Cholesterol biosynthesis via desmosterol	-0.2988	-0.1721	0.1267
R-HSA-6807062	Cholesterol biosynthesis via lathosterol	-0.2988	-0.1721	0.1267
R-HSA-8935964	RUNX1 regulates expression of components of tight junctions	-0.234246	-0.1079	0.126346
R-HSA-977347	Serine biosynthesis	0.07775	0.204	0.12625
R-HSA-425407	SLC-mediated transmembrane transport	-0.108692	0.01743	0.126122
R-HSA-9031628	NGF-stimulated transcription	-0.1676	-0.04171	0.12589
R-HSA-5654693	FRS-mediated FGFR1 signaling	-0.09271	0.03308	0.12579
R-HSA-73980	RNA Polymerase III Transcription Termination	-0.2689	-0.1432	0.1257
R-HSA-5654700	FRS-mediated FGFR2 signaling	-0.09217	0.03339	0.12556
R-HSA-1855204	Synthesis of IP3 and IP4 in the cytosol	-0.07716	0.04797	0.12513
R-HSA-68884	Mitotic Telophase/Cytokinesis	-0.05418	0.07081	0.12499
R-HSA-3772470	Negative regulation of TCF-dependent signaling by WNT ligand antagonists	-0.0926196	0.03207	0.12469
R-HSA-9026519	Activated NTRK2 signals through RAS	-0.369667	-0.2455	0.124167
R-HSA-8850843	Phosphate bond hydrolysis by NTPDase proteins	0.0695909	0.1936	0.124009
R-HSA-418346	Platelet homeostasis	-0.102501	0.02134	0.123841
R-HSA-196849	Metabolism of water-soluble vitamins and cofactors	-0.1127	0.01114	0.12384
R-HSA-2485179	Activation of the phototransduction cascade	-0.0630042	0.06081	0.123814
R-HSA-9013700	NOTCH4 Activation and Transmission of Signal to the Nucleus	-0.1518	-0.02856	0.12324
R-HSA-549127	Organic cation transport	-0.121	0.001931	0.122931
R-HSA-549132	Organic cation/anion/zwitterion transport	-0.121	0.001931	0.122931
R-HSA-176417	Phosphorylation of Emi1	-0.09634	0.02648	0.12282
R-HSA-1630316	Glycosaminoglycan metabolism	-0.1461	-0.02338	0.12272
R-HSA-8940973	RUNX2 regulates osteoblast differentiation	-0.2448	-0.1222	0.1226
R-HSA-5654732	Negative regulation of FGFR3 signaling	-0.1927	-0.07036	0.12234
R-HSA-9754189	Germ layer formation at gastrulation	-0.222642	-0.1012	0.121442
R-HSA-418886	Netrin mediated repulsion signals	-0.1883	-0.0668579	0.121442
R-HSA-8939242	RUNX1 regulates transcription of genes involved in differentiation of keratinocytes	-0.198779	-0.0774	0.121379
R-HSA-5685942	HDR through Homologous Recombination (HRR)	-0.1295	-0.008295	0.121205
R-HSA-1650814	Collagen biosynthesis and modifying enzymes	-0.13654	-0.01549	0.12105
R-HSA-9851151	MDK and PTN in ALK signaling	-0.2136	-0.0926912	0.120909
R-HSA-9818564	Epigenetic regulation of gene expression by MLL3 and MLL4 complexes	-0.1677	-0.04696	0.12074
R-HSA-9841922	MLL4 and MLL3 complexes regulate expression of PPARG target genes in adipogenesis and hepatic steatosis	-0.1677	-0.04696	0.12074
R-HSA-9851695	Epigenetic regulation of adipogenesis genes by MLL3 and MLL4 complexes	-0.1677	-0.04696	0.12074
R-HSA-8957322	Metabolism of steroids	-0.201242	-0.08101	0.120232
R-HSA-5654727	Negative regulation of FGFR2 signaling	-0.1984	-0.07843	0.11997
R-HSA-9028731	Activated NTRK2 signals through FRS2 and FRS3	-0.0623	0.05755	0.11985
R-HSA-2980766	Nuclear Envelope Breakdown	-0.1944	-0.07467	0.11973
R-HSA-5654726	Negative regulation of FGFR1 signaling	-0.1986	-0.07895	0.11965
R-HSA-6783310	Fanconi Anemia Pathway	-0.08045	0.03883	0.11928
R-HSA-9034864	Activated NTRK3 signals through RAS	-0.317121	-0.198	0.119121
R-HSA-176412	Phosphorylation of the APC/C	-0.1503	-0.03159	0.11871
R-HSA-5654712	FRS-mediated FGFR4 signaling	-0.0385733	0.07956	0.118133
R-HSA-2426168	Activation of gene expression by SREBF (SREBP)	-0.217579	-0.09948	0.118098
R-HSA-351906	Apoptotic cleavage of cell adhesion proteins	-0.144707	-0.02692	0.117787
R-HSA-381771	Synthesis, secretion, and inactivation of Glucagon-like Peptide-1 (GLP-1)	-0.173276	-0.05573	0.117546
R-HSA-5654706	FRS-mediated FGFR3 signaling	-0.04917	0.06831	0.11748
R-HSA-112399	IRS-mediated signalling	-0.1093	0.007841	0.117141
R-HSA-5661270	Formation of xylulose-5-phosphate	-0.252776	-0.1359	0.116876
R-HSA-5173214	O-glycosylation of TSR domain-containing proteins	0.0259325	0.1424	0.116468
R-HSA-9031525	NR1H2 & NR1H3 regulate gene expression to limit cholesterol uptake	-0.249482	-0.1331	0.116382
R-HSA-418889	Caspase activation via Dependence Receptors in the absence of ligand	-0.2211	-0.104966	0.116134
R-HSA-9717189	Sensory perception of taste	-0.0112318	0.1049	0.116132
R-HSA-5682910	LGI-ADAM interactions	-0.152	-0.03642	0.11558
R-HSA-201722	Formation of the beta-catenin:TCF transactivating complex	-0.2096	-0.09414	0.11546
R-HSA-9831926	Nephron development	-0.1432	-0.0278973	0.115303
R-HSA-1606341	IRF3 mediated activation of type 1 IFN	-0.219206	-0.1049	0.114306
R-HSA-5654743	Signaling by FGFR4	-0.1619	-0.04784	0.11406
R-HSA-2980767	Activation of NIMA Kinases NEK9, NEK6, NEK7	-0.159233	-0.04536	0.113873
R-HSA-198753	ERK/MAPK targets	-0.2713	-0.1578	0.1135
R-HSA-350054	Notch-HLH transcription pathway	-0.260668	-0.1474	0.113268
R-HSA-4411364	Binding of TCF/LEF:CTNNB1 to target gene promoters	-0.2978	-0.1852	0.1126
R-HSA-176407	Conversion from APC/C:Cdc20 to APC/C:Cdh1 in late anaphase	-0.227828	-0.1153	0.112529
R-HSA-442982	Ras activation upon Ca2+ influx through NMDA receptor	-0.0877	0.02468	0.11238
R-HSA-442742	CREB1 phosphorylation through NMDA receptor-mediated activation of RAS signaling	-0.1756	-0.06354	0.11206
R-HSA-5635838	Activation of SMO	-0.0379886	0.0740509	0.11204
R-HSA-3214815	HDACs deacetylate histones	-0.214	-0.102	0.112
R-HSA-9603798	Class I peroxisomal membrane protein import	-0.1088	0.00287	0.11167
R-HSA-3769402	Deactivation of the beta-catenin transactivating complex	-0.2028	-0.09114	0.11166
R-HSA-69231	Cyclin D associated events in G1	-0.1484	-0.03676	0.11164
R-HSA-69236	G1 Phase	-0.1484	-0.03676	0.11164
R-HSA-390650	Histamine receptors	0.531	0.6426	0.1116
R-HSA-2892245	POU5F1 (OCT4), SOX2, NANOG repress genes related to differentiation	-0.3984	-0.288	0.1104
R-HSA-8876198	RAB GEFs exchange GTP for GDP on RABs	-0.1582	-0.04789	0.11031
R-HSA-438066	Unblocking of NMDA receptors, glutamate binding and activation	-0.08549	0.02404	0.10953
R-HSA-73780	RNA Polymerase III Chain Elongation	-0.270504	-0.161	0.109504
R-HSA-3214842	HDMs demethylate histones	-0.247558	-0.1381	0.109458
R-HSA-5685939	HDR through MMEJ (alt-NHEJ)	-0.1442	-0.0348912	0.109309
R-HSA-68949	Orc1 removal from chromatin	-0.126	-0.01673	0.10927
R-HSA-170145	Phosphorylation of proteins involved in the G2/M transition by Cyclin A:Cdc2 complexes	-0.0732208	0.03588	0.109101
R-HSA-73776	RNA Polymerase II Promoter Escape	-0.2774	-0.1683	0.1091
R-HSA-73779	RNA Polymerase II Transcription Pre-Initiation And Promoter Opening	-0.2774	-0.1683	0.1091
R-HSA-75953	RNA Polymerase II Transcription Initiation	-0.2774	-0.1683	0.1091
R-HSA-76042	RNA Polymerase II Transcription Initiation And Promoter Clearance	-0.2774	-0.1683	0.1091
R-HSA-72306	tRNA processing	-0.241816	-0.1332	0.108616
R-HSA-5654741	Signaling by FGFR3	-0.1598	-0.05139	0.10841
R-HSA-6794361	Neurexins and neuroligins	-0.1113	-0.002943	0.108357
R-HSA-193670	p75NTR negatively regulates cell cycle via SC1	-0.280018	-0.1721	0.107918
R-HSA-432142	Platelet sensitization by LDL	-0.150575	-0.04303	0.107545
R-HSA-5624958	ARL13B-mediated ciliary trafficking of INPP5E	-0.2346	-0.1271	0.1075
R-HSA-1793185	Chondroitin sulfate/dermatan sulfate metabolism	-0.1975	-0.09066	0.10684
R-HSA-8951430	RUNX3 regulates WNT signaling	-0.2963	-0.1895	0.1068
R-HSA-6811438	Intra-Golgi traffic	-0.209986	-0.1039	0.106086
R-HSA-111447	Activation of BAD and translocation to mitochondria	-0.1536	-0.04763	0.10597
R-HSA-2028269	Signaling by Hippo	-0.0815	0.02436	0.10586
R-HSA-3371378	Regulation by c-FLIP	-0.117	-0.01127	0.10573
R-HSA-5218900	CASP8 activity is inhibited	-0.117	-0.01127	0.10573
R-HSA-69416	Dimerization of procaspase-8	-0.117	-0.01127	0.10573
R-HSA-390918	Peroxisomal lipid metabolism	-0.09936	0.005966	0.105326
R-HSA-418038	Nucleotide-like (purinergic) receptors	-0.229841	-0.1246	0.105241
R-HSA-8939246	RUNX1 regulates transcription of genes involved in differentiation of myeloid cells	-0.020596	0.08434	0.104936
R-HSA-210993	Tie2 Signaling	-0.134756	-0.03147	0.103286
R-HSA-2142789	Ubiquinol biosynthesis	-0.2894	-0.1862	0.1032
R-HSA-400508	Incretin synthesis, secretion, and inactivation	-0.1574	-0.05482	0.10258
R-HSA-9823739	Formation of the anterior neural plate	-0.2907	-0.1885	0.1022
R-HSA-6783984	Glycine degradation	-0.1264	-0.02459	0.10181
R-HSA-1660499	Synthesis of PIPs at the plasma membrane	-0.140984	-0.0393	0.101684
R-HSA-163125	Post-translational modification: synthesis of GPI-anchored proteins	0.06196	0.1635	0.10154
R-HSA-8854518	AURKA Activation by TPX2	-0.1633	-0.06217	0.10113
R-HSA-8941333	RUNX2 regulates genes involved in differentiation of myeloid cells	-0.02065	0.08037	0.10102
R-HSA-390247	Beta-oxidation of very long chain fatty acids	-0.1105	-0.01001	0.10049
R-HSA-209968	Thyroxine biosynthesis	0.0966943	0.1968	0.100106
R-HSA-8941326	RUNX2 regulates bone development	-0.229762	-0.1297	0.100062
R-HSA-176408	Regulation of APC/C activators between G1/S and early anaphase	-0.1502	-0.05049	0.09971
R-HSA-6787450	tRNA modification in the mitochondrion	-0.177	-0.07743	0.09957
R-HSA-380259	Loss of Nlp from mitotic centrosomes	-0.1627	-0.06318	0.09952
R-HSA-380284	Loss of proteins required for interphase microtubule organization from the centrosome	-0.1627	-0.06318	0.09952
R-HSA-141405	Inhibition of the proteolytic activity of APC/C required for the onset of anaphase by mitotic spindle checkpoint components	-0.242404	-0.1434	0.0990039
R-HSA-141430	Inactivation of APC/C via direct inhibition of the APC/C complex	-0.242404	-0.1434	0.0990039
R-HSA-73854	RNA Polymerase I Promoter Clearance	-0.1686	-0.07082	0.09778
R-HSA-9022702	MECP2 regulates transcription of neuronal ligands	-0.275	-0.1773	0.0977
R-HSA-9615017	FOXO-mediated transcription of oxidative stress, metabolic and neuronal genes	-0.2191	-0.1215	0.0976
R-HSA-9825892	Regulation of MITF-M-dependent genes involved in cell cycle and proliferation	-0.121094	-0.02367	0.0974238
R-HSA-449836	Other interleukin signaling	-0.1665	-0.0691059	0.0973941
R-HSA-9619665	EGR2 and SOX10-mediated initiation of Schwann cell myelination	-0.112957	-0.01629	0.0966673
R-HSA-1834941	STING mediated induction of host immune responses	-0.249637	-0.153	0.0966372
R-HSA-68962	Activation of the pre-replicative complex	0.0856	0.182	0.0964
R-HSA-1614635	Sulfur amino acid metabolism	-0.241	-0.14502	0.0959802
R-HSA-3270619	IRF3-mediated induction of type I IFN	-0.2738	-0.1779	0.0959
R-HSA-211859	Biological oxidations	-0.09703	-0.0011405	0.0958895
R-HSA-9617324	Negative regulation of NMDA receptor-mediated neuronal transmission	-0.07583	0.02	0.09583
R-HSA-140534	Caspase activation via Death Receptors in the presence of ligand	-0.1152	-0.01981	0.09539
R-HSA-196071	Metabolism of steroid hormones	-0.226641	-0.1313	0.0953411
R-HSA-75876	Synthesis of very long-chain fatty acyl-CoAs	-0.227325	-0.132	0.0953245
R-HSA-73863	RNA Polymerase I Transcription Termination	-0.2551	-0.1606	0.0945
R-HSA-69052	Switching of origins to a post-replicative state	-0.126	-0.03164	0.09436
R-HSA-75072	mRNA Editing	-0.178516	-0.0846041	0.0939121
R-HSA-114516	Disinhibition of SNARE formation	-0.2611	-0.1673	0.0938
R-HSA-5675221	Negative regulation of MAPK pathway	-0.1671	-0.07333	0.09377
R-HSA-5368598	Negative regulation of TCF-dependent signaling by DVL-interacting proteins	-0.2025	-0.109	0.0935
R-HSA-8868766	rRNA processing in the mitochondrion	-0.2377	-0.1443	0.0934
R-HSA-9854907	Regulation of MITF-M dependent genes involved in metabolism	0.0118422	0.1051	0.0932578
R-HSA-209776	Metabolism of amine-derived hormones	0.0510096	0.1439	0.0928904
R-HSA-8937144	Aryl hydrocarbon receptor signalling	-0.06549	0.0272338	0.0927238
R-HSA-3371511	HSF1 activation	-0.09463	-0.00239	0.09224
R-HSA-380270	Recruitment of mitotic centrosome proteins and complexes	-0.159	-0.0671	0.0919
R-HSA-380287	Centrosome maturation	-0.159	-0.0671	0.0919
R-HSA-913709	O-linked glycosylation of mucins	-0.1294	-0.03795	0.09145
R-HSA-212676	Dopamine Neurotransmitter Release Cycle	-0.1559	-0.06515	0.09075
R-HSA-3108214	SUMOylation of DNA damage response and repair proteins	-0.1533	-0.06255	0.09075
R-HSA-191273	Cholesterol biosynthesis	-0.18729	-0.09655	0.09074
R-HSA-156580	Phase II - Conjugation of compounds	-0.0780826	0.01263	0.0907126
R-HSA-9034013	NTF3 activates NTRK3 signaling	-0.2015	-0.1112	0.0903
R-HSA-380320	Recruitment of NuMA to mitotic centrosomes	-0.1517	-0.06226	0.08944
R-HSA-4641262	Disassembly of the destruction complex and recruitment of AXIN to the membrane	-0.1351	-0.04656	0.08854
R-HSA-73864	RNA Polymerase I Transcription	-0.1725	-0.08415	0.08835
R-HSA-180024	DARPP-32 events	-0.2329	-0.1449	0.088
R-HSA-69200	Phosphorylation of proteins involved in G1/S transition by active Cyclin E:Cdk2 complexes	-0.07606	0.01181	0.08787
R-HSA-435354	Zinc transporters	-0.1635	-0.07608	0.08742
R-HSA-9620244	Long-term potentiation	-0.1168	-0.02959	0.08721
R-HSA-199220	Vitamin B5 (pantothenate) metabolism	-0.036189	0.05099	0.087179
R-HSA-9007101	Rab regulation of trafficking	-0.1567	-0.06966	0.08704
R-HSA-2465910	MASTL Facilitates Mitotic Progression	-0.1683	-0.08131	0.08699
R-HSA-5654688	SHC-mediated cascade:FGFR1	-0.317542	-0.2307	0.0868423
R-HSA-76071	RNA Polymerase III Transcription Initiation From Type 3 Promoter	-0.2606	-0.1762	0.0844
R-HSA-4641265	Repression of WNT target genes	-0.187044	-0.103	0.084044
R-HSA-389661	Glyoxylate metabolism and glycine degradation	-0.0767434	0.007072	0.0838154
R-HSA-2142691	Synthesis of Leukotrienes (LT) and Eoxins (EX)	-0.140672	-0.05686	0.0838116
R-HSA-5654704	SHC-mediated cascade:FGFR3	-0.289433	-0.2058	0.0836333
R-HSA-5693548	Sensing of DNA Double Strand Breaks	-0.1952	-0.1117	0.0835
R-HSA-156584	Cytosolic sulfonation of small molecules	-0.0052145	0.07799	0.0832045
R-HSA-379724	tRNA Aminoacylation	-0.145234	-0.06203	0.0832041
R-HSA-198725	Nuclear Events (kinase and transcription factor activation)	-0.1761	-0.09302	0.08308
R-HSA-5654699	SHC-mediated cascade:FGFR2	-0.304235	-0.2215	0.0827351
R-HSA-186763	Downstream signal transduction	-0.09961	-0.01781	0.0818
R-HSA-1483249	Inositol phosphate metabolism	-0.04918	0.03186	0.08104
R-HSA-6794362	Protein-protein interactions at synapses	-0.1194	-0.03836	0.08104
R-HSA-9752946	Expression and translocation of olfactory receptors	-0.1334	-0.05248	0.08092
R-HSA-156711	Polo-like kinase mediated events	-0.08297	-0.002618	0.080352
R-HSA-9858328	OADH complex synthesizes glutaryl-CoA from 2-OA	-0.04587	0.03394	0.07981
R-HSA-4085377	SUMOylation of SUMOylation proteins	-0.1185	-0.03882	0.07968
R-HSA-5620920	Cargo trafficking to the periciliary membrane	-0.2072	-0.1282	0.079
R-HSA-69205	G1/S-Specific Transcription	-0.1509	-0.07225	0.07865
R-HSA-69190	DNA strand elongation	-0.02628	0.05235	0.07863
R-HSA-112310	Neurotransmitter release cycle	-0.167832	-0.08922	0.0786119
R-HSA-9614399	Regulation of localization of FOXO transcription factors	-0.1349	-0.0567698	0.0781302
R-HSA-9022699	MECP2 regulates neuronal receptors and channels	-0.2132	-0.1352	0.078
R-HSA-9853506	OGDH complex synthesizes succinyl-CoA from 2-OG	-0.07748	0.0004542	0.0779342
R-HSA-170984	ARMS-mediated activation	-0.07264	0.004891	0.077531
R-HSA-8964572	Lipid particle organization	-0.09086	-0.01362	0.07724
R-HSA-480985	Synthesis of dolichyl-phosphate-glucose	-0.372707	-0.2964	0.0763068
R-HSA-5173105	O-linked glycosylation	-0.0489135	0.0271	0.0760135
R-HSA-5693554	Resolution of D-loop Structures through Synthesis-Dependent Strand Annealing (SDSA)	-0.1693	-0.09352	0.07578
R-HSA-181430	Norepinephrine Neurotransmitter Release Cycle	-0.1858	-0.1109	0.0749
R-HSA-181429	Serotonin Neurotransmitter Release Cycle	-0.1841	-0.1094	0.0747
R-HSA-9842860	Regulation of endogenous retroelements	-0.0337	0.04078	0.07448
R-HSA-69273	Cyclin A/B1/B2 associated events during G2/M transition	-0.1077	-0.03428	0.07342
R-HSA-74751	Insulin receptor signalling cascade	-0.111321	-0.03792	0.0734011
R-HSA-75105	Fatty acyl-CoA biosynthesis	-0.1936	-0.1205	0.0731
R-HSA-399997	Acetylcholine regulates insulin secretion	-0.264	-0.191	0.073
R-HSA-933541	TRAF6 mediated IRF7 activation	-0.197954	-0.1251	0.0728537
R-HSA-5632681	Ligand-receptor interactions	0.143563	0.2162	0.0726372
R-HSA-5694530	Cargo concentration in the ER	-0.217032	-0.1444	0.0726318
R-HSA-141424	Amplification of signal from the kinetochores	-0.1473	-0.07485	0.07245
R-HSA-141444	Amplification of signal from unattached kinetochores via a MAD2 inhibitory signal	-0.1473	-0.07485	0.07245
R-HSA-450604	KSRP (KHSRP) binds and destabilizes mRNA	-0.1349	-0.06254	0.07236
R-HSA-6782315	tRNA modification in the nucleus and cytosol	-0.1512	-0.07898	0.07222
R-HSA-451306	Ionotropic activity of kainate receptors	0.1047	0.176406	0.0717062
R-HSA-451308	Activation of Ca-permeable Kainate Receptor	0.1047	0.176406	0.0717062
R-HSA-888590	GABA synthesis, release, reuptake and degradation	-0.1681	-0.09666	0.07144
R-HSA-2500257	Resolution of Sister Chromatid Cohesion	-0.1556	-0.08447	0.07113
R-HSA-450513	Tristetraprolin (TTP, ZFP36) binds and destabilizes mRNA	-0.0833801	-0.01295	0.0704301
R-HSA-176187	Activation of ATR in response to replication stress	0.0665826	0.1368	0.0702174
R-HSA-202670	ERKs are inactivated	-0.253268	-0.183457	0.0698101
R-HSA-5673000	RAF activation	-0.1958	-0.1265	0.0693
R-HSA-381753	Olfactory Signaling Pathway	-0.1528	-0.08367	0.06913
R-HSA-72200	mRNA Editing: C to U Conversion	0.02998	0.09881	0.06883
R-HSA-75094	Formation of the Editosome	0.02998	0.09881	0.06883
R-HSA-8963743	Digestion and absorption	0.103524	0.1718	0.0682759
R-HSA-196299	Beta-catenin phosphorylation cascade	-0.1675	-0.09923	0.06827
R-HSA-446210	Synthesis of UDP-N-acetyl-glucosamine	-0.205202	-0.1379	0.0673019
R-HSA-5357769	Caspase activation via extrinsic apoptotic signalling pathway	-0.123	-0.056339	0.066661
R-HSA-400511	Synthesis, secretion, and inactivation of Glucose-dependent Insulinotropic Polypeptide (GIP)	-0.145692	-0.07947	0.0662219
R-HSA-69618	Mitotic Spindle Checkpoint	-0.1556	-0.08994	0.06566
R-HSA-9911233	Expression of NOTCH2NL genes	0.0503252	0.1156	0.0652748
R-HSA-9648025	EML4 and NUDC in mitotic spindle formation	-0.1598	-0.09523	0.06457
R-HSA-83936	Transport of nucleosides and free purine and pyrimidine bases across the plasma membrane	-0.0029219	0.06156	0.0644819
R-HSA-71064	Lysine catabolism	-0.03052	0.03375	0.06427
R-HSA-210500	Glutamate Neurotransmitter Release Cycle	-0.233543	-0.1694	0.0641428
R-HSA-8985801	Regulation of cortical dendrite branching	0.1091	0.1716	0.0625
R-HSA-170968	Frs2-mediated activation	-0.1183	-0.05655	0.06175
R-HSA-6793080	rRNA modification in the mitochondrion	-0.2024	-0.1408	0.0616
R-HSA-3214847	HATs acetylate histones	-0.128345	-0.06681	0.0615349
R-HSA-1855183	Synthesis of IP2, IP, and Ins in the cytosol	-0.06931	-0.009163	0.060147
R-HSA-112308	Presynaptic depolarization and calcium channel opening	0.2926	0.3523	0.0597
R-HSA-5669034	TNFs bind their physiological receptors	-0.0543513	0.005345	0.0596963
R-HSA-5357786	TNFR1-induced proapoptotic signaling	-0.11095	-0.0519814	0.0589687
R-HSA-9832991	Formation of the posterior neural plate	-0.235923	-0.1771	0.0588227
R-HSA-9857492	Protein lipoylation	-0.1016	-0.04331	0.05829
R-HSA-169893	Prolonged ERK activation events	-0.101	-0.04413	0.05687
R-HSA-3371453	Regulation of HSF1-mediated heat shock response	-0.05675	9.128e-05	0.0568413
R-HSA-75035	Chk1/Chk2(Cds1) mediated inactivation of Cyclin B:Cdk1 complex	-0.07906	-0.02229	0.05677
R-HSA-8847453	Synthesis of PIPs in the nucleus	-0.263209	-0.2065	0.0567092
R-HSA-74182	Ketone body metabolism	-0.0993343	-0.04641	0.0529243
R-HSA-5693537	Resolution of D-Loop Structures	-0.1495	-0.09671	0.05279
R-HSA-5693568	Resolution of D-loop Structures through Holliday Junction Intermediates	-0.1495	-0.09671	0.05279
R-HSA-425410	Metal ion SLC transporters	-0.1168	-0.06417	0.05263
R-HSA-9733709	Cardiogenesis	-0.1837	-0.1317	0.052
R-HSA-5693579	Homologous DNA Pairing and Strand Exchange	-0.1198	-0.07004	0.04976
R-HSA-73762	RNA Polymerase I Transcription Initiation	-0.1626	-0.113	0.0496
R-HSA-2142670	Synthesis of epoxy (EET) and dihydroxyeicosatrienoic acids (DHET)	-0.528749	-0.4795	0.049249
R-HSA-8953750	Transcriptional Regulation by E2F6	-0.0508	-0.0018428	0.0489572
R-HSA-264642	Acetylcholine Neurotransmitter Release Cycle	-0.2134	-0.1645	0.0489
R-HSA-5620916	VxPx cargo-targeting to cilium	-0.202051	-0.1534	0.0486506
R-HSA-8875656	MET receptor recycling	-0.0778933	-0.03053	0.0473633
R-HSA-9843940	Regulation of endogenous retroelements by KRAB-ZFP proteins	0.0285	0.07518	0.04668
R-HSA-416993	Trafficking of GluR2-containing AMPA receptors	-0.1319	-0.0853	0.0466
R-HSA-5693616	Presynaptic phase of homologous DNA pairing and strand exchange	-0.115	-0.06864	0.04636
R-HSA-425366	Transport of bile salts and organic acids, metal ions and amine compounds	-0.128301	-0.08225	0.0460512
R-HSA-187687	Signalling to ERKs	-0.1253	-0.08267	0.04263
R-HSA-162658	Golgi Cisternae Pericentriolar Stack Reorganization	-0.1063	-0.06406	0.04224
R-HSA-379726	Mitochondrial tRNA aminoacylation	-0.0809366	-0.0406	0.0403366
R-HSA-4551638	SUMOylation of chromatin organization proteins	-0.102648	-0.06558	0.0370677
R-HSA-450385	Butyrate Response Factor 1 (BRF1) binds and destabilizes mRNA	-0.1116	-0.07573	0.03587
R-HSA-2142816	Synthesis of (16-20)-hydroxyeicosatetraenoic acids (HETE)	-0.4868	-0.4552	0.0316
R-HSA-5685938	HDR through Single Strand Annealing (SSA)	-0.100235	-0.06892	0.0313152
R-HSA-1362300	Transcription of E2F targets under negative control by p107 (RBL1) and p130 (RBL2) in complex with HDAC1	-0.1755	-0.1442	0.0313
R-HSA-2892247	POU5F1 (OCT4), SOX2, NANOG activate genes related to proliferation	-0.184707	-0.1537	0.0310071
R-HSA-264876	Insulin processing	-0.171791	-0.1413	0.0304908
R-HSA-204005	COPII-mediated vesicle transport	-0.116701	-0.09449	0.0222113
