# Supplementary material
Source: Research Square preprint supplement (doi:10.21203/rs.3.rs-8757376/v1)
Supplement: Supplementary file 2 [file 160f71e10ea9b93160f4fc79.xlsx]

## Sheet: Sheet1
AIM2
CASP1
CASP3
CASP4
CASP5
CASP6
CASP8
CASP9
ELANE
GPX4
GSDMA
GSDMB
GSDMC
GSDMD
GSDME
IL18
IL1B
IL6
NLRC4
NLRP1
NLRP2
NLRP3
NLRP6
NLRP7
NOD1
NOD2
PJVK
PLCG1
PRKACA
PYCARD
SCAF11
TIRAP
TNF
BAK1
BAX
CHMP2A
CHMP2B
CHMP3
CHMP4A
CHMP4B
CHMP4C
CHMP6
CHMP7
CYCS
GZMB
HMGB1
IL1A
IRF1
IRF2
TP53
TP63
APIP
DHX9
GZMA
NAIP
NLRP9
ZBP1
CARD8
DPP9
DPP8
STAT3
MALAT1
SIRT1
KCNQ1OT1
TREM2
MIR223
FOXO3
MIR30C1
NFE2L2
NEK7
TXNIP
DDX3X
MIR22
MIR125A
GBP1
MEG3
MIR135B
MIR556
GJA1
UBR2
CPTP
PRDM1
MIR214
GAS5
VDR
PCSK9
BRD4
IKBKE
AGER
PKM
CRTAC1
TET2
CTSV
UTS2
MIR155
MLKL
NFKB1
APOE
SDHB
P2RX7
EEF2K
CD274
FGF21
DLX6-AS1
MIR23A
KLF3-AS1
CEBPB
BSG
TFAM
PGF
NLRX1
SLC16A4
IL32
CHRFAM7A
MIR21
MIR124-1
MIR195
MIR485
MALT1
TLR2
GSK3B
STK4
PTGS2
MST1
PRF1
TRIM24
ELAVL1
MPEG1
MIR204
HOTTIP
CDKN2B-AS1
MIR9-1
MIR9-2
MIR9-3
MIR497
EPHA2
ABL1
HDAC6
SQSTM1
IRF3
CDK9
TREM1
TSLP
ZDHHC1
STING1
HNP1
PTEN
DRD2
ADORA1
ADORA2B
ADORA2A
ADORA3
METTL3
PECAM1
TRIM31
METTL14
MIR25
IFI16
CAMP
MRE11
FNDC4
FNDC5
