# Supplementary material
Source: Research Square preprint supplement (doi:10.21203/rs.3.rs-8757376/v1)
Supplement: Supplementary file 3 [file 77dc3e8ef427d2d8198e3fd1.xlsx]

## Sheet: Sheet1
Ingenuity Canonical Pathways	-log(p-value)	Ratio	z-score	Molecules
Primary Immunodeficiency Signaling	5	0.255	#NUM!	AIRE,BLNK,CD19,CD3D,CD40LG,CD79A,CD8A,DCLRE1C,ICOS,IGLL1/IGLL5,JCHAIN,TNFRSF13B,ZAP70
Atherosclerosis Signaling	4.02	0.159	#NUM!	ALOX15B,APOE,CD40LG,COL10A1,CXCL12,CXCR4,F3,LCAT,MMP9,ORM1,ORM2,PLA2G12A,PLA2G2A,PLA2G2D,PLA2G4A,PLA2G7,PNPLA8,RBP4,REL,TNFSF14
PI3K Signaling in B Lymphocytes	3.83	0.15	-0.728	ATF1,ATF2,BLK,BLNK,CAMK2A,CD19,CD79A,CR2,DAPP1,IKBKE,MRAS,NFATC1,PIK3AP1,PIK3CA,PLCB1,PLCL1,PLEKHA3,PRKCI,RAP1B,RASD2,REL
Eicosanoid Signaling	3.82	0.2	-1.134	ALOX15B,HPGDS,LCAT,PLA2G12A,PLA2G2A,PLA2G2D,PLA2G4A,PLA2G7,PNPLA8,PTGDR,PTGDS,PTGER1,PTGIS
Osteoarthritis Pathway	3.58	0.125	0.209	ALPP,ATF2,CCN4,COL10A1,CREB5,FRZB,FZD6,FZD7,GLI2,GREM1,HDAC4,HIF1A,HMGB1,IL1R1,IL1RAP,IL1RAPL1,ITGA11,ITGA6,ITGB6,ITLN1,LEP,MMP9,RBP4,REL,RUNX2,SMAD9,SPP1,VEGFA,VEGFD
Tumor Microenvironment Pathway	3.55	0.135	-0.209	CSF2,CXCL12,CXCR4,FAS,FGF12,FGF13,HIF1A,HLA-G,IGF1,IL10,LEP,LEPR,MMP11,MMP19,MMP9,MRAS,PIK3C3,PIK3CA,RAP1B,RASD2,REL,SPP1,VEGFA,VEGFD
Antioxidant Action of Vitamin C	3.51	0.159	1.387	CSF2,CSF2RA,IKBKE,LCAT,NAPEPLD,PLA2G12A,PLA2G2A,PLA2G2D,PLA2G4A,PLA2G7,PLCB1,PLCL1,PNPLA8,REL,SLC2A14,SLC2A5,TXNRD1
Sperm Motility	3.22	0.119	-1.387	BLK,CACNA1I,CATSPER2,CNGB1,CSF2RA,DSTYK,DYRK3,EPHB1,FRK,GNAI1,GNB3,LCAT,MET,MRAS,NTRK2,PDE1A,PLA2G12A,PLA2G2A,PLA2G2D,PLA2G4A,PLA2G7,PLCB1,PLCL1,PNPLA8,PRKCI,ROR2,SLC12A2,YES1,ZAP70
Role of Tissue Factor in Cancer	3.14	0.148	#NUM!	BLK,CSF2,EIF4E,F3,FGA,FGG,FRK,ITGA6,MRAS,PDIA6,PIK3C3,PIK3CA,PLCB1,RAP1B,RASD2,VEGFA,YES1
p53 Signaling	2.99	0.153	-0.277	E2F1,FAS,HIF1A,JMY,KAT2B,PCNA,PERP,PIK3C3,PIK3CA,PLAGL1,PMAIP1,RRM2B,SERPINE2,SNAI2,TP63
Pulmonary Healing Signaling Pathway	2.91	0.122	0	BLK,CSF2,CXCL12,CXCR4,ELANE,FRK,FZD6,FZD7,HIF1A,MMP11,MMP19,MMP9,MRAS,NFATC1,PRKCI,RAP1B,RASD2,SMAD9,SOS1,VEGFA,VEGFD,WWTR1,YAP1,YES1
Axonal Guidance Signaling	2.88	0.0976	#NUM!	ACE,ACE2,ACTR3,ADAM28,ADAMDEC1,ADAMTS2,BMP8B,CXCL12,CXCR4,EIF4E,EPHB1,EPHB6,FZD6,FZD7,GLI2,GNAI1,GNB3,IGF1,ITGA11,ITGA6,ITGB6,MET,MMP11,MMP9,MRAS,NFATC1,NTNG1,NTRK2,PIK3C3,PIK3CA,PLCB1,PLCL1,PRKCI,RAP1B,RASD2,ROBO1,ROBO2,SEMA3B,SEMA3C,SEMA3G,SEMA4D,SOS1,TUBA3C/TUBA3D,TUBA4A,TUBB2A,UNC5A,VEGFA,VEGFD
Phospholipases	2.86	0.177	-1.508	LCAT,NAPEPLD,PLA1A,PLA2G12A,PLA2G2A,PLA2G2D,PLA2G4A,PLA2G7,PLCB1,PLCL1,PNPLA8
VEGF Family Ligand-Receptor Interactions	2.71	0.155	-1.155	MRAS,PIK3C3,PIK3CA,PLA2G12A,PLA2G2A,PLA2G2D,PLA2G4A,PRKCI,RAP1B,RASD2,SOS1,VEGFA,VEGFD
Prostanoid Biosynthesis	2.64	0.4	0	HPGDS,PTGDS,PTGES3,PTGIS
MSP-RON Signaling In Cancer Cells Pathway	2.61	0.129	-1	ATF2,CREB5,ELF5,HIF1A,ITGA6,KLK10,KLK7,MET,MRAS,PIK3C3,PIK3CA,RAP1B,RASD2,REL,SOS1,VEGFA,VEGFD,YWHAE
Role Of Osteoclasts In Rheumatoid Arthritis Signaling Pathway	2.6	0.106	-1.3	ADAM28,ATF2,BLNK,COL10A1,COL21A1,COL4A4,CREB5,CSF2,CTSK,FCGR3A/FCGR3B,FRZB,IKBKE,IL10,IL1R1,IL1RAP,IL1RAPL1,MMP11,MMP19,MMP9,MRAS,NFATC1,PIK3C3,PIK3CA,RAP1B,RASD2,RHOB,RHOBTB1,SFRP1,SOS1,SPP1,TAB2
Estrogen-Dependent Breast Cancer Signaling	2.43	0.15	-1.134	ATF2,CREB5,HSD17B14,HSD17B2,HSD17B7,IGF1,MRAS,PIK3C3,PIK3CA,RAP1B,RASD2,REL
ERK/MAPK Signaling	2.41	0.112	-0.894	ATF1,ATF2,CREB5,DUSP6,EIF4E,ELF5,ITGA11,ITGA6,ITGB6,MRAS,NFATC1,PIK3C3,PIK3CA,PLA2G12A,PLA2G2A,PLA2G2D,PLA2G4A,PPP1R12A,PRKCI,RAP1B,RASD2,SOS1,TLN2,VRK2
HIF1α Signaling	2.39	0.113	-0.209	ADRA1B,CAMK1G,CAMK2A,EDN1,EGLN3,EIF4E,HIF1A,HSPA1A/HSPA1B,IGF1,MET,MMP11,MMP19,MMP9,MRAS,PIK3C3,PIK3CA,PRKCI,RAP1B,RASD2,SLC2A14,SLC2A5,VEGFA,VEGFD
Airway Pathology in Chronic Obstructive Pulmonary Disease	2.37	0.133	#NUM!	CD40LG,CSF2,CTSG,ELANE,FGF12,FGF13,LEP,MMP9,MPO,ORM1,ORM2,PTGDS,RBP4,TNFSF14,TNFSF15
Agranulocyte Adhesion and Diapedesis	2.36	0.114	#NUM!	ACTA1,ACTC1,CCL19,CCL22,CCL28,CLDN10,CLDN14,CLDN3,CXCL12,CXCL13,CXCL5,CXCR4,CXCR5,GNAI1,IL1R1,MMP11,MMP19,MMP9,MYH3,MYO10,MYO18A,SELL
Role of Macrophages, Fibroblasts and Endothelial Cells in Rheumatoid Arthritis	2.29	0.1	#NUM!	ATF2,CAMK2A,CREB5,CSF2,CXCL12,FCGR3A/FCGR3B,FRZB,FZD6,FZD7,IKBKE,IL10,IL1R1,IL1RAP,IL1RAPL1,IRAK4,JCHAIN,MRAS,NFATC1,NLK,PIK3C3,PIK3CA,PLCB1,PLCL1,PRKCI,RAP1B,RASD2,ROR2,SFRP1,TLR1,TLR10,VEGFA,VEGFD
Glucocorticoid Receptor Signaling	2.27	0.0904	#NUM!	CCNH,CD3D,CD3G,CSF2,FGG,GJA1,GTF2H1,GTF2H2,HLA-DOB,HLA-DQA2,HLA-G,HMGB1,HP,HSPA1A/HSPA1B,IGF1,IKBKE,IL10,IL17RD,IL1R1,KAT2B,KRT17,KRT222,KRT27,KRT4,MED14,MMP9,MNAT1,MRAS,NCOR1,NDUFA5,NDUFB9,NDUFS2,NFATC1,PC,PIK3C3,PIK3CA,PLA2G12A,PLA2G2A,PLA2G2D,PLA2G4A,POLR2J2/POLR2J3,POLR2K,PTGES3,RAP1B,RASD2,SOS1,SUMO1,TAF4B,TAF9
MSP-RON Signaling In Macrophages Pathway	2.27	0.129	-1.387	ATF2,CREB5,HLA-DOB,HLA-DQA2,IKBKE,IL10,KLK10,KLK7,MRAS,PIK3C3,PIK3CA,RAP1B,RASD2,REL,SOS1
Endothelin-1 Signaling	2.23	0.113	-2.236	ADCY1,EDN1,GNAI1,LCAT,MRAS,NAPEPLD,PIK3C3,PIK3CA,PLA2G12A,PLA2G2A,PLA2G2D,PLA2G4A,PLA2G7,PLCB1,PLCL1,PNPLA8,PRKCI,RAP1B,RASD2,SHF,SOS1
Estrogen Receptor Signaling	2.2	0.0948	-1.372	ADCY1,ATF2,CREB5,EIF4E,GNAI1,GNB3,HIF1A,IGF1,LEP,LEPR,MED13L,MED14,MED17,MED21,MMP11,MMP19,MMP9,MRAS,NCOR1,NDUFA5,NDUFB9,NDUFS2,PCNA,PIK3C3,PIK3CA,PLCB1,PLCL1,PPP1R12A,PRKCI,RAP1B,RASD2,REL,RUNX2,SHF,SOS1,TRIM63,VEGFA,VEGFD
WNT/Ca+ pathway	2.19	0.154	-0.333	ATF2,CAMK2A,CREB5,FZD6,FZD7,NFATC1,PDE6B,PLCB1,PLCL1,REL
Role Of Osteoblasts In Rheumatoid Arthritis Signaling Pathway	2.19	0.107	1.043	CD40LG,CSF2,CTSG,CTSK,CTSO,CXCL12,FRZB,FZD6,FZD7,IGF1,LEP,MMP11,MMP19,MMP9,PIK3C3,PIK3CA,RUNX2,SFRP1,SMAD9,SMURF2,TNFSF14,TNFSF15,VEGFA,VEGFD
VEGF Signaling	2.16	0.134	0	ACTA1,ACTC1,EIF1AX,HIF1A,MRAS,PIK3C3,PIK3CA,RAP1B,RASD2,SOS1,VEGFA,VEGFD,YWHAE
Hepatic Fibrosis / Hepatic Stellate Cell Activation	2.13	0.111	#NUM!	CD40LG,COL10A1,COL21A1,COL4A4,EDN1,FAS,IGF1,IL10,IL1R1,IL1RAP,IL1RAPL1,LEP,LEPR,MET,MMP9,MYH3,MYO10,MYO18A,REL,VEGFA,VEGFD
Adipogenesis pathway	2.08	0.12	#NUM!	CCNH,CLOCK,FZD6,FZD7,GTF2H1,GTF2H2,HAT1,HDAC4,HIF1A,KAT2B,KLF3,KLF5,LEP,MNAT1,RUNX1T1,SMAD9
NF-κB Activation by Viruses	2.07	0.141	-0.333	CR2,CXCR5,IKBKE,ITGA6,MRAS,PIK3C3,PIK3CA,PRKCI,RAP1B,RASD2,REL
Chondroitin Sulfate Degradation (Metazoa)	2.05	0.286	1	CEMIP,HEXA,HEXD,HYAL3
Role of MAPK Signaling in the Pathogenesis of Influenza	2.03	0.139	#NUM!	ATF2,LCAT,MRAS,PLA2G12A,PLA2G2A,PLA2G2D,PLA2G4A,PLA2G7,PNPLA8,RAP1B,RASD2
ILK Signaling	1.98	0.107	-0.277	ACTA1,ACTC1,ATF2,CREB5,FBLIM1,HIF1A,ITGB6,LIMS1,MMP9,MYH3,MYO10,MYO18A,PIK3C3,PIK3CA,PPP1R12A,REL,RHOB,RHOBTB1,SNAI2,VEGFA,VEGFD
Crosstalk between Dendritic Cells and Natural Killer Cells	1.98	0.132	1.633	ACTA1,ACTC1,CAMK2A,CD209,CD40LG,CSF2,FAS,HLA-G,KIR2DL1/KIR2DL3,NCR3,REL,TLN2
GM-CSF Signaling	1.96	0.143	0	BCL2A1,CAMK2A,CSF2,CSF2RA,MRAS,PIK3C3,PIK3CA,RAP1B,RASD2,SOS1
Assembly of RNA Polymerase II Complex	1.95	0.16	-2.828	CCNH,GTF2H1,GTF2H2,MNAT1,POLR2J2/POLR2J3,POLR2K,TAF4B,TAF9
Multiple Sclerosis Signaling Pathway	1.94	0.105	0.426	CAPN11,CD40LG,CSF2,DUSP6,EED,FAS,HLA-DOB,HLA-DQA2,HLA-G,IL10,IRF4,LEP,MMP9,MPO,MTF2,PARP15,PARP16,RNF213,TLR1,TLR10,TNFSF14,TNFSF15
Dermatan Sulfate Degradation (Metazoa)	1.94	0.267	1	CEMIP,HEXA,HEXD,HYAL3
Granulocyte Adhesion and Diapedesis	1.92	0.109	#NUM!	CCL19,CCL22,CCL28,CLDN10,CLDN14,CLDN3,CXCL12,CXCL13,CXCL5,CXCR4,CXCR5,GNAI1,IL1R1,IL1RAP,IL1RAPL1,MMP11,MMP19,MMP9,SELL
Circadian Rhythm Signaling	1.89	0.0989	#NUM!	ADCY1,ATF2,BLK,BTRC,CACNA1I,CAMK2A,CATSPER2,CIART,CLOCK,CREB5,CRY1,EIF4E,FBXL3,FRK,GNAI1,GNB3,HIF1A,MRAS,NTRK2,PLCB1,PLCL1,PRKCI,PTGDS,RAP1B,RASD2,YES1
Pathogen Induced Cytokine Storm Signaling Pathway	1.88	0.0938	0.354	CCL19,CCL22,CCL28,CD40LG,COL10A1,COL21A1,COL4A4,CSF2,CSF2RA,CXCL12,CXCL13,CXCL5,CXCR4,EOMES,FGA,FGG,HLA-DOB,HLA-DQA2,IL10,IL1R1,IL1RAP,IL1RAPL1,LEP,NLRC3,SLC2A14,SLC2A5,TLR1,TLR10,TNFSF14,TNFSF15,VEGFA,VEGFD
Paxillin Signaling	1.85	0.123	0.333	ACTA1,ACTC1,ARF6,ITGA11,ITGA6,ITGB6,MRAS,PIK3C3,PIK3CA,RAP1B,RASD2,SOS1,TLN2
BMP signaling pathway	1.8	0.129	0.707	ATF2,BMP8B,GREM1,MRAS,RAP1B,RASD2,REL,RUNX2,SMAD9,SOS1,SOSTDC1
Integrin Signaling	1.78	0.102	0	ACTA1,ACTC1,ACTR3,ARF6,CAPN11,ITGA11,ITGA6,ITGB6,LIMS1,MRAS,NEDD9,PIK3C3,PIK3CA,PPP1R12A,RAP1B,RASD2,RHOB,RHOBTB1,SOS1,TLN2,TSPAN2
p38 MAPK Signaling	1.77	0.117	-1.941	ATF1,ATF2,CREB5,FAS,IL1R1,IL1RAP,IL1RAPL1,IRAK4,MAPT,PLA2G12A,PLA2G2A,PLA2G2D,PLA2G4A,TAB2
Oxytocin In Brain Signaling Pathway	1.77	0.104	-0.894	ATF2,CACNA1I,CATSPER2,CREB5,GNAI1,GNB3,LCAT,MRAS,NLRP8,PIK3C3,PIK3CA,PLA2G12A,PLA2G2A,PLA2G2D,PLA2G4A,PLA2G7,PNPLA8,PRKCI,RAP1B,RASD2
cAMP-mediated signaling	1.76	0.0996	0.894	ADCY1,ADORA3,AKAP1,AKAP10,AKAP9,ATF2,CAMK1G,CAMK2A,CHRM3,CNGB1,CREB5,CREM,DUSP6,GDPD1,GNAI1,GRM8,NAPEPLD,PDE1A,PDE3B,PDE6B,PTGDR,S1PR1,TDP2
Gap Junction Signaling	1.74	0.103	#NUM!	ACTA1,ACTC1,ADCY1,GJA1,GJA5,GJB2,GNAI1,HTR2B,MRAS,PIK3C3,PIK3CA,PLCB1,PLCL1,PRKCI,RAP1B,RASD2,SOS1,TUBA3C/TUBA3D,TUBA4A,TUBB2A
NAD Signaling Pathway	1.74	0.11	-0.535	CLOCK,GJA1,HIF1A,IGF1,NUDT12,PARP15,PARP16,PIK3C3,PIK3CA,POLR2J2/POLR2J3,POLR2K,SIRT4,SLC29A3,SLC5A8,TPCN1,VEGFA
Macropinocytosis Signaling	1.73	0.132	-1.89	ARF6,ITGB6,MET,MRAS,MRC1,PIK3C3,PIK3CA,PRKCI,RAP1B,RASD2
Nucleotide Excision Repair Pathway	1.71	0.171	#NUM!	CCNH,GTF2H1,GTF2H2,MNAT1,POLR2J2/POLR2J3,POLR2K
tRNA Splicing	1.7	0.156	-0.378	GDPD1,NAPEPLD,PDE1A,PDE3B,PDE6B,TDP2,TSEN15
HMGB1 Signaling	1.69	0.107	-1.265	CD40LG,CSF2,HAT1,HMGB1,IL1R1,KAT2B,LEP,MRAS,PIK3C3,PIK3CA,RAP1B,RASD2,REL,RHOB,RHOBTB1,TNFSF14,TNFSF15
Acute Phase Response Signaling	1.69	0.103	0.905	C1S,FGA,FGG,HAMP,HP,IKBKE,IL1R1,IL1RAP,MRAS,ORM1,ORM2,PIK3CA,RAP1B,RASD2,RBP4,REL,SAA1,SERPIND1,SOS1
LXR/RXR Activation	1.69	0.114	2.111	APOE,CYP51A1,FGA,IL1R1,IL1RAP,IL1RAPL1,LCAT,MMP9,NCOR1,ORM1,ORM2,RBP4,REL,SAA1
Chemokine Signaling	1.69	0.13	1	CAMK1G,CAMK2A,CXCL12,CXCR4,GNAI1,MRAS,PLCB1,PPP1R12A,RAP1B,RASD2
Melatonin Degradation II	1.67	0.5	#NUM!	IL4I1,MAOB
Trans, trans-farnesyl Diphosphate Biosynthesis	1.67	0.5	#NUM!	FDPS,IDI1
Neuroprotective Role of THOP1 in Alzheimer's Disease	1.67	0.116	0	ACE,CTSG,DPP4,FAP,GZMK,GZMM,HLA-G,KLK10,KLK7,MAPT,MMP9,PNOC,YWHAE
Renal Cell Carcinoma Signaling	1.66	0.128	-0.816	EGLN3,HIF1A,MET,MRAS,PIK3C3,PIK3CA,RAP1B,RASD2,SOS1,VEGFA
14-3-3-mediated Signaling	1.61	0.111	-2.53	MAPT,MRAS,PIK3C3,PIK3CA,PLCB1,PLCL1,PRKCI,RAP1B,RASD2,TUBA3C/TUBA3D,TUBA4A,TUBB2A,YAP1,YWHAE
Actin Nucleation by ARP-WASP Complex	1.6	0.121	0	ACTR3,ITGA11,ITGA6,ITGB6,MRAS,PPP1R12A,RAP1B,RASD2,RHOB,RHOBTB1,SOS1
Relaxin Signaling	1.59	0.106	0	ADCY1,GDPD1,GNAI1,GNB3,MMP9,MRAS,NAPEPLD,PDE1A,PDE3B,PDE6B,PIK3C3,PIK3CA,RAP1B,REL,TDP2,VEGFA
Synaptic Long Term Depression	1.58	0.101	-1.698	CACNA1I,CATSPER2,CRH,GNAI1,GRM8,IGF1,LCAT,MRAS,PLA2G12A,PLA2G2A,PLA2G2D,PLA2G4A,PLA2G7,PLCB1,PLCL1,PNPLA8,PRKCI,RAP1B,RASD2
Sertoli Cell-Sertoli Cell Junction Signaling	1.58	0.099	#NUM!	ACTA1,ACTC1,ATF2,CLDN10,CLDN14,CLDN3,DLG1,F11R,ITGA11,ITGA6,ITGB6,MAGI2,MRAS,MYO7A,PALS2,RAP1B,RASD2,TUBA3C/TUBA3D,TUBA4A,TUBB2A
Inhibition of Matrix Metalloproteases	1.55	0.158	0	MMP11,MMP19,MMP9,TFPI2,THBS2,TIMP4
Pulmonary Fibrosis Idiopathic Signaling Pathway	1.54	0.0901	-0.577	ACTA1,ACTC1,ATF2,CCN4,COL10A1,COL21A1,COL4A4,CXCL12,EDN1,EED,FZD6,FZD7,GLI2,ITGB6,MMP11,MMP19,MMP9,MRAS,MTF2,PIK3C3,PIK3CA,PMAIP1,RAP1B,RASD2,REL,RTEL1,SOS1,WWTR1,YAP1
Regulation Of The Epithelial Mesenchymal Transition By Growth Factors Pathway	1.52	0.099	0	CD40LG,CLDN3,FGF12,FGF13,IKBKE,MET,MMP9,MRAS,PIK3C3,PIK3CA,RAP1B,RASD2,REL,SNAI2,SOS1,TNFSF14,TNFSF15,WWTR1,YAP1
Glioma Invasiveness Signaling	1.51	0.127	-1.134	MMP9,MRAS,PIK3C3,PIK3CA,RAP1B,RASD2,RHOB,RHOBTB1,TIMP4
Role of NANOG in Mammalian Embryonic Stem Cell Pluripotency	1.5	0.11	-0.816	BMP8B,FZD6,FZD7,GATA6,LIFR,MRAS,PIK3C3,PIK3CA,RAP1B,RASD2,RIF1,SMAD9,SOS1
CCR3 Signaling in Eosinophils	1.48	0.107	-1.897	GNAI1,GNB3,MRAS,PIK3C3,PIK3CA,PLA2G12A,PLA2G2A,PLA2G2D,PLA2G4A,PLCB1,PPP1R12A,PRKCI,RAP1B,RASD2
Thrombin Signaling	1.48	0.0955	-1	ADCY1,CAMK1G,CAMK2A,GATA3,GATA5,GATA6,GNAI1,GNB3,MRAS,PIK3C3,PIK3CA,PLCB1,PLCL1,PPP1R12A,PRKCI,RAP1B,RASD2,REL,RHOB,RHOBTB1,SOS1
Ovarian Cancer Signaling	1.48	0.103	-0.333	E2F1,EDN1,FZD6,FZD7,GJA1,HDAC4,MMP9,MRAS,MSH2,PIK3C3,PIK3CA,RAD51,RAP1B,RASD2,VEGFA,VEGFD
Arsenate Detoxification I (Glutaredoxin)	1.47	0.4	#NUM!	AS3MT,GLRX2
P2Y Purigenic Receptor Signaling Pathway	1.46	0.106	-0.577	ADCY1,ATF2,CREB5,GNAI1,GNB3,MRAS,PIK3C3,PIK3CA,PLCB1,PLCL1,PRKCI,RAP1B,RASD2,REL
PEDF Signaling	1.46	0.119	-0.707	ARHGAP22,DOCK3,FAS,IKBKE,MRAS,PIK3C3,PIK3CA,RAP1B,RASD2,REL
IL-15 Production	1.45	0.108	-0.577	BLK,CSF2RA,DSTYK,DYRK3,EPHB1,FRK,MET,NTRK2,PRKCI,REL,ROR2,YES1,ZAP70
Role of MAPK Signaling in Promoting the Pathogenesis of Influenza	1.45	0.111	0	ATF2,ATP6V1E2,LCAT,MRAS,PLA2G12A,PLA2G2A,PLA2G2D,PLA2G4A,PLA2G7,PNPLA8,RAP1B,RASD2
Oxytocin Signaling Pathway	1.44	0.0909	-1	ATF2,ATP2B1,CREB5,GJA1,GNAI1,GNB3,LEP,MRAS,MYH3,MYO10,MYO18A,NFATC1,PIK3C3,PIK3CA,PLA2G12A,PLA2G2A,PLA2G2D,PLA2G4A,PLCB1,PPP1R12A,PRKCI,RAP1B,RASD2,REL,SOS1
p70S6K Signaling	1.43	0.105	-0.577	CD19,CD79A,GNAI1,MAPT,MRAS,PIK3C3,PIK3CA,PLCB1,PLCL1,PRKCI,RAP1B,RASD2,SOS1,YWHAE
LPS-stimulated MAPK Signaling	1.43	0.118	-0.707	ATF1,ATF2,IKBKE,MRAS,PIK3C3,PIK3CA,PRKCI,RAP1B,RASD2,REL
HIPPO signaling	1.43	0.118	1.633	BTRC,DLG1,DLG2,PPP1R12A,RASSF6,SAV1,TEAD3,WWTR1,YAP1,YWHAE
Colorectal Cancer Metastasis Signaling	1.4	0.0909	0.688	ADCY1,APPL1,FZD6,FZD7,GNAI1,GNB3,MMP11,MMP19,MMP9,MRAS,MSH2,PIK3C3,PIK3CA,PTGER1,RAP1B,RASD2,REL,RHOB,RHOBTB1,SOS1,TLR1,TLR10,VEGFA,VEGFD
FcγRIIB Signaling in B Lymphocytes	1.4	0.116	-0.378	BLNK,CACNA1I,CATSPER2,CD79A,MRAS,PIK3C3,PIK3CA,RAP1B,RASD2,SOS1
Phagosome Formation	1.39	0.0792	-1.387	ACTR3,ADGRG5,ADORA3,ADRA1B,AP1S3,ARF6,CD209,CHRM3,CMKLR1,CMKLR2,CR2,FCAR,FCGR3A/FCGR3B,FZD6,FZD7,GPR18,GPR183,GPR65,GRM8,HTR2B,ITGA11,ITGA6,ITGB6,JCHAIN,LCAT,MRAS,MRC1,MYH3,MYO10,MYO18A,NAPEPLD,NMUR2,PIK3C3,PIK3CA,PIP4K2B,PLA2G12A,PLA2G2A,PLA2G2D,PLA2G4A,PLA2G7,PNPLA8,PRKCI,PTGDR,PTGER1,RAP1B,RASD2,S1PR1,SOS1,SSTR2,TLN2,TLR1,TLR10,YES1
Phagosome Maturation	1.38	0.101	#NUM!	ATP6V1E2,CTSG,CTSK,CTSO,DCTN4,DYNC1LI1,HLA-G,MPO,PIK3C3,SNAP25,TUBA3C/TUBA3D,TUBA4A,TUBB2A,TUBD1,TUBE1
Prostate Cancer Signaling	1.37	0.108	#NUM!	ATF2,CREB5,E2F1,HDAC4,MRAS,NKX3-1,PIK3C3,PIK3CA,RAP1B,RASD2,REL,SOS1
ID1 Signaling Pathway	1.37	0.095	-0.688	BHLHE22,BLK,CHRNA1,E2F1,FRK,GLI2,HIF1A,LIFR,MMP9,MRAS,PIK3C3,PIK3CA,RAP1B,RASD2,SMAD9,TGM2,VEGFA,VEGFD,YES1
Neuroinflammation Signaling Pathway	1.36	0.0879	1.043	ATF2,BIRC7,CREB5,CXCL12,FAS,HLA-DOB,HLA-DQA2,HLA-G,HMGB1,IKBKE,IL10,IL1R1,IRAK4,KCNJ5,MAPT,MMP9,NFATC1,PIK3C3,PIK3CA,PLA2G12A,PLA2G2A,PLA2G2D,PLA2G4A,REL,SLC1A3,TLR1,TLR10
Estrogen Biosynthesis	1.36	0.143	0	CYP1B1,CYP3A5,CYP51A1,HSD17B14,HSD17B2,HSD17B7
Cardiac Hypertrophy Signaling (Enhanced)	1.36	0.0811	-1.372	ACE,ADCY1,ADRA1B,ATF2,CAMK2A,CD40LG,CSF2,DLG1,EDN1,EIF4E,FGF12,FGF13,FZD6,FZD7,GDPD1,GNAI1,GNB3,HDAC4,IGF1,IKBKE,IL17RD,IL1R1,ITGA11,ITGA6,ITGB6,LEP,MRAS,NAPEPLD,NFATC1,PDE1A,PDE3B,PDE6B,PIK3C3,PIK3CA,PLCB1,PLCL1,PRKCI,RAP1B,RASD2,REL,TDP2,TNFSF14,TNFSF15
Angiopoietin Signaling	1.34	0.118	0.447	ANGPTL1,IKBKE,MRAS,PIK3C3,PIK3CA,RAP1B,RASD2,REL,SOS1
Regulation of Cellular Mechanics by Calpain Protease	1.34	0.114	1	CAPN11,CAST,CNGB1,ITGA11,ITGA6,ITGB6,MRAS,RAP1B,RASD2,TLN2
Synaptogenesis Signaling Pathway	1.32	0.0871	1.8	ACTR3,ADCY1,APOE,ATF2,CAMK2A,CDH10,CDH3,CNTNAP2,COMP,CREB5,EPHB1,EPHB6,GRM8,MAPT,MRAS,NTRK2,PIK3C3,PIK3CA,RAP1B,RASD2,RASGRF1,SHF,SNAP25,SOS1,STXBP6,THBS2,YES1
Zymosterol Biosynthesis	1.31	0.333	#NUM!	CYP51A1,HSD17B7
